# Supplementary material for: Experiences of nicotine users motivated to quit during the COVID-19 pandemic: a secondary qualitative analysis
Source: PubMed Central journal article supplement — BMJ Open. 2023 Jun 26;13(6):e070906. doi: 10.1136/bmjopen-2022-070906 (PMC10410857; doi:10.1136/bmjopen-2022-070906), 2023-06-26
Supplement: bmjopen-2022-070906.draft_revisions.pdf [file bmjopen-2022-070906.draft_revisions.pdf]

# BMJ Open

BMJ Open is committed to open peer review. As part of this commitment we make the peer review history of every article we publish publicly available.

When an article is published we post the peer reviewers' comments and the authors' responses online. We also post the versions of the paper that were used during peer review. These are the versions that the peer review comments apply to.

The versions of the paper that follow are the versions that were submitted during the peer review process. They are not the versions of record or the final published versions. They should not be cited or distributed as the published version of this manuscript.

BMJ Open is an open access journal and the full, final, typeset and author-corrected version of record of the manuscript is available on our site with no access controls, subscription charges or pay-per-view fees (<http://bmjopen.bmj.com>).

If you have any questions on BMJ Open's open peer review process please email [info.bmjopen@bmj.com](mailto:info.bmjopen@bmj.com)

# BMJ Open

## Experiences of Nicotine Users Motivated to Quit During the COVID-19 Pandemic: A Secondary Qualitative Analysis

|                               |                                                                                                                                                                                                                 |
|-------------------------------|-----------------------------------------------------------------------------------------------------------------------------------------------------------------------------------------------------------------|
| Journal:                      | <i>BMJ Open</i>                                                                                                                                                                                                 |
| Manuscript ID                 | bmjopen-2022-070906                                                                                                                                                                                             |
| Article Type:                 | Original research                                                                                                                                                                                               |
| Date Submitted by the Author: | 08-Dec-2022                                                                                                                                                                                                     |
| Complete List of Authors:     | Sharma, Ramona; The University of British Columbia Okanagan, School of Social Work<br>Rodberg, Danielle; The University of British Columbia Okanagan, School of Nursing<br>Struik, Laura; UBC Okanagan, Nursing |
| Keywords:                     | COVID-19, ONCOLOGY, PUBLIC HEALTH, SOCIAL MEDICINE                                                                                                                                                              |
|                               |                                                                                                                                                                                                                 |

SCHOLARONE™  
Manuscripts

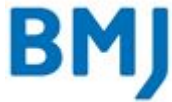

I, the Submitting Author has the right to grant and does grant on behalf of all authors of the Work (as defined in the below author licence), an exclusive licence and/or a non-exclusive licence for contributions from authors who are: i) UK Crown employees; ii) where BMJ has agreed a CC-BY licence shall apply, and/or iii) in accordance with the terms applicable for US Federal Government officers or employees acting as part of their official duties; on a worldwide, perpetual, irrevocable, royalty-free basis to BMJ Publishing Group Ltd ("BMJ") its licensees and where the relevant Journal is co-owned by BMJ to the co-owners of the Journal, to publish the Work in this journal and any other BMJ products and to exploit all rights, as set out in our [licence](#).

The Submitting Author accepts and understands that any supply made under these terms is made by BMJ to the Submitting Author unless you are acting as an employee on behalf of your employer or a postgraduate student of an affiliated institution which is paying any applicable article publishing charge ("APC") for Open Access articles. Where the Submitting Author wishes to make the Work available on an Open Access basis (and intends to pay the relevant APC), the terms of reuse of such Open Access shall be governed by a Creative Commons licence – details of these licences and which [Creative Commons](#) licence will apply to this Work are set out in our licence referred to above.

Other than as permitted in any relevant BMJ Author's Self Archiving Policies, I confirm this Work has not been accepted for publication elsewhere, is not being considered for publication elsewhere and does not duplicate material already published. I confirm all authors consent to publication of this Work and authorise the granting of this licence.

## EXPERIENCES OF NICOTINE USERS DURING COVID-19

**EXPERIENCES OF NICOTINE USERS MOTIVATED TO QUIT DURING THE COVID-19 PANDEMIC: A  
SECONDARY QUALITATIVE ANALYSIS****AUTHORS**

- Corresponding Author: Ramona H. Sharma, BSc, MSW Student - School of Social Work, The University of British Columbia (Okanagan Campus), Kelowna, Canada
  - Postal address: Faculty of Health and Social Development, 1147 Research Road, University of British Columbia Okanagan, Kelowna, BC Canada, V1V 1V7
  - Email: [ramona.sharma@ubc.ca](mailto:ramona.sharma@ubc.ca)
- Danielle Rodberg, BSN Student - School of Nursing, The University of British Columbia (Okanagan Campus), Kelowna, Canada
- Laura L. Struik, PhD, Assistant Professor - School of Nursing, The University of British Columbia (Okanagan Campus), Kelowna, Canada

**WORD COUNT**

3960 words

**KEYWORDS**

Nicotine, Smoking, Electronic Nicotine Delivery Systems, COVID-19

## ABSTRACT

**Objectives:** The COVID-19 pandemic has brought to light a variety of key factors that affect tobacco use, including behavioral patterns, social support and connection, and physical and mental health. What we do not know is how those motivated to quit were impacted by the pandemic. As such, understanding the unique experiences and needs of people motivated to quit smoking or vaping during the COVID-19 pandemic is critical. The aim of this study was to examine the cessation experiences of nicotine users during the COVID-19 pandemic. **Design:** We conducted an auto-driven qualitative secondary analysis of semi-structured interviews with individuals engaged in cigarette smoking, dual use, or e-cigarette use. **Setting:** British Columbia, Canada. **Participants:** Relevant data were drawn from 33 participants out of the primary study's 80-participant sample pool. **Measures:** Interview questions explored barriers and facilitators to quitting nicotine use. We then used an auto-driven qualitative secondary analysis approach to identify emergent themes and subthemes surrounding pandemic-specific barriers and facilitators to quitting, and unique needs for cessation support in the context of the COVID-19 pandemic. **Results:** Pandemic-specific barriers included lifestyle limitations and poor mental health due to isolation. Facilitators to quitting during the pandemic included reduced access and opportunities to use nicotine products, as well as time for personal reflection on nicotine use behaviors. Suggestions for cessation programming included a primary focus on enhancing social support features (e.g., discussion forums, support groups), followed by increasing awareness of the benefits of quitting, and enhancing visibility of resources available to support quitting. **Conclusions:** The findings provide directions for how cessation supports can be tailored to better meet the needs of users motivated to quit during and beyond the COVID-19 pandemic.

## STRENGTHS AND LIMITATIONS OF THIS STUDY

- Our qualitative approach provides detailed data on the unique needs of nicotine users hoping to quit in both pandemic and post-pandemic contexts.
- We recruited a diverse array of participants, including smokers, vapers, and dual users.
- The larger study that the present data is derived from was not designed to investigate quitting during the pandemic, which may impact generalizability.

## INTRODUCTION

Globally, nicotine addiction continues to remain one of the most significant public health threats [1]. However, many nicotine users of all ages report a desire to quit [2]. Environmental and psychosocial factors play a key role in shaping cessation and reduction trajectories, including the availability of appropriate and accessible supports, diversity and accessibility of available nicotine products, federal and regional policies, historical contexts such as ongoing economic, public health, and socio-political events, and individual characteristics such as mental health, income, education, and social support [3]. One example of a significant and multifaceted environmental factor that has influenced tobacco use behaviors is the recent COVID-19 pandemic. Indeed, tobacco use patterns and cessation trajectories appear to have shifted in various directions because of the pandemic.

For some tobacco users, the pandemic correlated with an increase in use. For example, a higher proportion of Canadians reported vaping on a daily basis compared with before the pandemic in 2019. According to the 2021 Canadian Tobacco and Nicotine Survey (4), among those who reported vaping in the past 30 days, 55% responded that they vaped on a daily basis, compared with 44% in 2019 [4]. In relation to cigarette smoking, 3% of Canadian smokers reported an increase in smoking [5]. This increase in use is disproportionate among certain groups, and researchers have brought forward how the pandemic has interacted with and subsequently enhanced pre-pandemic tobacco-related health risks among disadvantaged groups [6].

Mental health appears to play a major role in increased use of tobacco products during the pandemic. In Canada, individuals who reported having fair or poor mental health in 2020 were more likely to have increased their use of nicotine products [7]. Among Canadians who vaped in the past 30 days in 2021, 18% reported that their main reason for vaping was to reduce stress and anxiety [8]. Stress reduction was more commonly reported as the main reason for vaping by youth aged 15 to 19 in 2020 (33%) compared to 2019 (21%) [8]. Similar to vaping, many cigarette users have discussed experiencing a sense of relief from smoking during the pandemic – distressing emotions such as anxiety and depression skyrocketed during the pandemic, and as such, individuals started smoking more to cope and experience a sense of calm [9].

By contrast, some nicotine users experienced a decrease in their nicotine use, an increase in their motivation to quit, or experienced no change. For example, in 2020, about 14% of young Canadians reported vaping on a regular basis — a slight decrease from 15% in 2019 [8, 10]. Cigarette use decreased considerably between 2019 and 2020, with an overall 12% per cent drop among those aged 25 and older, and a 5% drop among those aged 15-19 [10, 8]. In addition, in 2020, 37% of Canadians aged 15 and over who reported vaping daily, and 39% of those in the same age demographic that smoked cigarettes daily, made at least one quit attempt lasting 24 hours [8]. Data from the Netherlands has demonstrated that quit smoking motivations during the pandemic generally surrounded perceptions of being at risk for developing severe illness, smokers being at higher risk than non-smokers, needing to quit smoking to reduce complaints during isolating with others in the household [11].

The COVID-19 pandemic has facilitated the emergence of alternative health care modalities; more people are turning to website, SMS, and/or telephone-based healthcare modalities, including resources for cessation support [12]. Simultaneously, the COVID-19 pandemic led to a reduction in existing cessation supports due to closures and staffing, infrastructure, and resource shortages [13].

1  
2  
3 These rapid changes to available cessation resources and programming likely affected the trajectory of  
4 those trying to quit. Understanding how cessation was impacted and how individuals' cessation needs  
5 shifted is critical to informing the development of more responsive and adaptive cessation resources  
6 that take into account the unique influence of the pandemic [14]. As a result, the aim of this study is to  
7 explore the cessation experiences of nicotine users motivated to quit during the COVID-19 pandemic.  
8  
9

## 10 **METHODS**

### 11 **Design**

12  
13 We employed auto-driven qualitative secondary analysis, which is an extended investigation of  
14 qualitative data gathered by the primary team of researchers [15]. In this vein, we aimed to extend our  
15 understanding of participant responses to questions posed in the primary study questions. More  
16 specifically, we sought to understand COVID-19-specific barriers and facilitators to quitting nicotine,  
17 which builds on the following questions asked in the primary research study: 1) "What might be some  
18 barriers to quitting?"; 2) "What are other aspects of your life that help facilitate reducing/quitting?"  
19 Ethical approval was received from the Behavioral Research Ethics Board at the University of British  
20 Columbia's Okanagan campus (#H21-00145). The design and analyses within this study were not pre-  
21 registered on a publicly available platform; as such, the results should be considered exploratory. The  
22 Standards for Reporting Qualitative Research (SRQR) reporting guidelines were used for quality appraisal  
23 [16]. Reflexivity was maintained by the research team throughout data analysis and manuscript writing  
24 by recording, discussing, and challenging established assumptions at all data collection and analysis  
25 stages.  
26  
27  
28  
29  
30  
31

### 32 **Primary Study**

33  
34 In the primary study, we conducted semi-structured interviews with 80 participants across  
35 British Columbia (BC), Canada between May to August 2021; these lasted between 30-60 minutes in  
36 duration. The purpose of this study was to understand the cessation needs of BC residents to inform  
37 improvements for online cessation programming (see online supplementary file 1 for the interview  
38 guide, which includes details of other question topics, such as motivations behind participants' nicotine  
39 use and cessation patterns and needs with respect to a free, provincially-funded online cessation  
40 support, QuitNow). Eligible participants were recruited through targeted Facebook and Instagram ads  
41 via a third party (PH1 Research). Participants met the following eligibility criteria: motivated to quit  
42 vaping or smoking, ages 16 and over, able to communicate in English, and able to provide informed  
43 consent. Participants completed a demographic survey and a 60-minute, audio-recorded, UBC Zoom  
44 interview, after which they received a \$50 online gift card to thank them for their time and input. These  
45 interviews were transcribed and analyzed by the research team using NVivo qualitative data analysis  
46 software. Participant interviews were undertaken by four researchers (author RS and further individuals  
47 named in Acknowledgements) of various disciplines (social work, nursing, kinesiology) who received  
48 identical training and utilized a pre-established interview guide to minimize individual differences in  
49 interview outcomes as a result of interviewer characteristics. Conscious efforts were made to seek  
50 elaboration and clarification from participants and not to accept potentially common assumptions at  
51 face value. No authors were known to any participants of this research prior to undertaking the study.  
52  
53  
54  
55  
56  
57  
58  
59  
60

## Data Collection

Two researchers (authors RS and DR) collected data on participant experiences surrounding COVID-19 and its influence on participant nicotine use and cessation needs. In each NVivo demographic file (n=80) from the primary study, keywords such as “COVID-19”, “pandemic”, “COVID”, “lockdown”, “isolation”, “home”, “stay AND home”, “public AND health AND order”, “health AND order”, “virtual”, “remote”, “online”, “Zoom”, “work AND home”, “not AND working”, “working AND less” were searched. In total, 33 participants discussed the impact of COVID-19 on their cessation experiences. All of these responses were collected and compiled in a Word document.

## Data Analysis

Upon compilation of participant responses, two collaborative coding sessions were held and, via inductive content analysis [17], a codebook was created and applied to all relevant responses to identify common patterns among participant cessation experiences and needs during the pandemic. We then charted all themes and subthemes onto Excel software to allow for visualization and comparison of major findings. Finally, we disaggregated all identified themes and subthemes by gender, nicotine user type, and age, but did not find significant differences in theme endorsement between the stated groups.

## Patient and Public Involvement

Participants were not involved in any aspect of the study design, recruitment, or conduct. Upon recruitment, participants were asked if they would like to receive the research findings via email upon completion of the study; findings will be disseminated through a written summary to participants who opted in. Academic outputs will be disseminated through social media and community networks.

## RESULTS

### Sample

We gathered COVID-19 related data from 33 participants. Participants included in this study were primarily male (55%), and non-Indigenous (73%). Most of the sample was between 16 and 29 years old (57%) (16-18, 18%; 19-24, 21%; 25-29, 18%), with the remaining 43% aged 30 and older. The majority of participants were dual users of both combustible cigarettes and e-cigarettes (40%), followed by only smokers (33%), and only vapers (27%).

### Themes

From participant reports, we found several themes that fit within the following three categories: (1) barriers to quitting nicotine use during the pandemic; (2) facilitators to quitting or reducing nicotine use during the pandemic; and (3) suggestions for improving cessation programming during the pandemic. The breakdown of these categories and associated themes, as well as the frequency of endorsement are outlined in Table 1.

Table 1. Themes and subthemes identified in participant responses and their associated frequencies



| Themes (n, %)                                                                   | Subthemes                                                                                                                                                                         | n(%)   |
|---------------------------------------------------------------------------------|-----------------------------------------------------------------------------------------------------------------------------------------------------------------------------------|--------|
| Barriers to quitting nicotine use during the pandemic (n=21, 64%)               | Isolation lent to lifestyle limitations (fewer activities, increased boredom, and minimal socializing)                                                                            | 16(48) |
|                                                                                 | Isolation increased stress and fostered poor mental health                                                                                                                        | 8(24)  |
| Facilitators to quit or reduce nicotine use during the pandemic (n=11, 33%)     | Pandemic reduced accessibility and opportunities to smoke/vape (fewer events, less social pressure, decreased access, etc.)                                                       | 6(18)  |
|                                                                                 | Pandemic prompted reflection on smoking/vaping behaviours                                                                                                                         | 5(15)  |
| Suggestions for improving cessation programming during the pandemic (n=19, 58%) | Enhance social support features (e.g., hosting virtual support via zoom and discussion forums; offering small in-person support groups)                                           | 11(33) |
|                                                                                 | Increase awareness of quitting benefits in pandemic context (e.g., impacts of smoking/vaping on COVID-19 health outcomes and financial implications during COVID-19 unemployment) | 7(21)  |
|                                                                                 | Increase awareness of resources and advice for those trying to quit during the pandemic                                                                                           | 5(15)  |

#### Barriers to quitting nicotine use during the pandemic

Numerous participants (64%) reported experiencing barriers to quitting nicotine use during the pandemic, particularly in relation to isolation. Of the individuals who experienced barriers to quitting, approximately half (48%) said the lifestyle limitations they experienced due to the pandemic were a barrier for them. Participants described how isolation measures resulted in a reduction in activities individuals could attend, limitations on socializing, and subsequently, an increase in boredom:

*'Last year for me personally, my partner and I planned on quitting and then COVID happened, and we didn't have anything to keep ourselves entertained so that's how we just fell back into the pit' (Participant 84, female).*

In this vein, individuals saw smoking and vaping as an activity to pass the time while being confined to their home environment, despite many not wanting to smoke or vape. A couple of participants even reported that nicotine usage provided them with a reason to go outside during the pandemic when they were otherwise advised to remain indoors. Furthermore, some participants reported that being confined to their home environment created an uncondusive environment for cessation, due to a lack of in-person support from family members, or being trapped in an environment with smokers:

*'I never smoked before COVID, but with COVID you're hanging out with the same people in the same bubble so you're doing what everyone is doing together' (Participant 29, female).*

Another prominent barrier to quitting was an elevated level of stress during the pandemic and associated with this, poor mental health. While some participants just spoke of general stress due to the

1  
2  
3 pandemic, several participants identified employment and school as specific stressors during the  
4 pandemic. According to nearly a quarter (24%) of participants, nicotine usage helped individuals cope  
5 with the stress they were experiencing:  
6  
7

8 'I'm working from home because of COVID. When I feel under a lot of pressure, I reach towards  
9 cigarettes...' (Participant 76, male).  
10

11  
12 Facilitators to quitting or reducing nicotine use during the pandemic

13 A third (33%) of participants reported experiencing facilitators for quitting nicotine use during  
14 the pandemic. A major theme reported by 18% of participants was that the pandemic reduced  
15 accessibility and opportunities to smoke/vape. A few individuals reported that this was because they  
16 were not able to attend social gatherings (e.g., parties) that were often associated with peer pressure to  
17 smoke or vape:  
18  
19

20  
21 '... if you smoke or vape in a more social setting, that all goes out the window with the  
22 Coronavirus...' (Participant 13, male).  
23  
24

25 In addition, a few individuals discussed how reduced access to nicotine-related products due to  
26 store closures, lockdowns, and isolation measures made it easier for them to reduce their nicotine  
27 usage:  
28  
29

30 'My vape broke at the beginning of the pandemic when all the stores were closed and nobody  
31 was going anywhere. I wasn't able to fix it, and I couldn't exactly ask my parents to go buy me a  
32 new vape, so I ended up pretty much quitting around then which was not fun but in hindsight  
33 was a stroke of luck' (Participant 31, male).  
34  
35

36  
37 Another facilitator commonly reported (15%) by participants was that the pandemic prompted  
38 individuals to become more introspective on their smoking/vaping behaviours. Individuals approached  
39 this with a variety of motivations. For example, one individual said witnessing someone in their social  
40 circle quit during the pandemic increased their own motivation for quitting; another individual stated  
41 that they wanted to quit to improve their lung health given the elevated negative respiratory impacts of  
42 COVID-19 on smokers; and a third individual said they wanted to save money for post-pandemic  
43 activities:  
44  
45

46  
47 '... I'm saving up for travelling right now and not for vaping so much so if I save enough money...  
48 I can actually go home after this silly pandemic is over' (Participant 73, male).  
49  
50

51 Suggestions for improving cessation programming during the pandemic

52 Over half of participants (55%) made comments in reference to improvements they would have  
53 liked to see with online cessation supports during COVID-19. Nicotine users had a variety of suggestions  
54 to tailor cessation supports for the pandemic context. The most common recommendation (33%) was to  
55 enhance social support features within cessation programming. The loss of social connection during the  
56  
57  
58  
59  
60

1  
2  
3 pandemic emphasized the need to ensure that social support was available to nicotine users in this  
4 context. In addition to in-person support groups, individuals advised that programming incorporates  
5 virtual support in the form of meetings via Zoom or online discussion forums to connect with others:  
6  
7

8 'I think organizing Zoom meetings or small group chats where you can say what you've  
9 accomplished and how you're struggling right now and then maybe create a few friends who are  
10 all trying to quit together' (Participant 37, male).  
11  
12

13 A large number of participants (21%) also suggested that programming increase awareness of  
14 the benefits of quitting specifically in relation to the pandemic. Individuals believed that since COVID-19  
15 is a respiratory disease, widely disseminating information on the health impacts of COVID-19 on people  
16 who smoke/vape would resonate with users. Participants also recommended including the financial  
17 implications of smoking/vaping as people were more attentive to money-related matters during the  
18 times of unemployment from COVID-19 layoffs:  
19  
20  
21

22 'I guarantee if people are scrolling through this, and they see the average smoker spends \$3,000  
23 a year on cigarettes, especially during COVID when people are losing their jobs, that would be a  
24 pretty big selling point' (Participant 64, male).  
25  
26  
27

28 A number of participants (15%) also highlighted a need for increased awareness of resources  
29 and advice for those trying to quit during the pandemic. Suggestions for achieving this included  
30 advertising through the means of social media and at locations that coincided with the lifestyle of the  
31 public during the pandemic (e.g., grocery stores and health centres). Additionally, as the pandemic  
32 resulted in boredom, people advised that suggestions on activities individuals could use to replace  
33 smoking and vaping would help people fill their free time:  
34  
35  
36

37 'I think maybe having a different strategy for people that are more isolated throughout COVID  
38 versus once restrictions start easing out so maybe they could recommend some other strategies  
39 and distractions, let's say as an example, going for a walk' (Participant 29, female).  
40  
41

## 42 **DISCUSSION**

43  
44

45 The present study highlights the impacts of the COVID-19 pandemic on individual nicotine  
46 cessation journeys. In addition, it establishes the importance of cessation support remaining up-to-date  
47 and taking into account the new and ever-changing psychosocial and socio-environmental factors that  
48 come with a global crisis. Finally, it speaks to the significance of centering participant voices and learning  
49 firsthand from nicotine users about their unique needs as it relates to barriers and facilitators to  
50 successfully quitting nicotine use.  
51

52 The pandemic revealed unique vulnerabilities of nicotine users that were not previously  
53 emphasized, such as the effects of boredom, stress, and isolation. Isolation in particular was a  
54 noteworthy barrier to quitting tobacco use according to this study. Many participants talked about how  
55 this isolation resulted in immense boredom. Boredom has been found to play a key role in increased  
56  
57  
58  
59  
60

1  
2  
3 alcohol and cannabis consumption during the pandemic [18], and our findings reveal that this similarly  
4 applies to use of tobacco products. The inability to engage in routine activities (e.g., enjoy outdoor  
5 activities, and engage in their regular exercise routine) that often served to distract them from using  
6 nicotine resulted in many participants turning to nicotine to help them pass the time. This finding is in  
7 line with other research identifying how nicotine use tends to increase when routines are disrupted and  
8 boredom is resultantly increased [19-20]. The ongoing impact of isolation cannot be underestimated,  
9 and our study findings foreground its role on tobacco use behaviors, which is largely negative.

10  
11  
12 It is also interesting that individuals spoke about continuing to smoke in order to go outside,  
13 versus going outside in order to smoke. The pandemic appeared to create a shift in focus (being outside  
14 rather than satisfying a craving) in relation to smoking. Having to go outside for a smoke has been  
15 previously perceived as a “hassle”, particularly after public smoke free bans were in place [21]. However,  
16 going outside for a smoke during the pandemic appears to have shifted this perspective among some  
17 smokers, wherein smoking was perceived as something that enabled a needed respite from the  
18 monotony of being indoors. Public health measures would benefit from considering the nature of  
19 tobacco use when implementing stay at home orders, and particularly consider how removing the ability  
20 to leave one’s home can perpetuate health risk behaviors, like smoking. Given that distractions have  
21 been identified as a key affordance to quitting [22], ensuring that healthy distractions, for example  
22 games and opportunities for inter-user communication embedded within app-based quit supports, are  
23 accessible and available during a pandemic is essential.

24  
25  
26  
27  
28 Some individuals found that the isolation associated with the pandemic made it easier to quit  
29 because there were fewer opportunities to experience social (“peer”) pressures around nicotine use;  
30 there were fewer parties and gatherings, and fewer opportunities to socialize with others who smoke  
31 and/or vape. On the other hand, living with other smokers and/or vapers and not being able to leave a  
32 shared environment due to lockdown measures proved a major barrier to quitting. Our findings  
33 corroborate existing studies that highlight how the opinions and behaviors of peers play a significant  
34 role in nicotine use maintenance [23]. However, as isolation and not seeing peers proved to be both a  
35 risk factor and a protective factor for increasing nicotine use, it is fundamental to note that that these  
36 findings are pertaining to exposure to social influences and contexts, and not social support. Social  
37 support is an integral element of cessation [24], and reduced connection with others due to the  
38 pandemic actually places an even greater weight on the importance of social support. In this vein, and  
39 according to the findings, the pandemic increased the perception that there should be priority on  
40 enhancing social support in existing cessation support programs, such as through forums, virtual and in-  
41 person support groups, coaching, and buddy systems, among others.

42  
43  
44  
45  
46 Although participants spoke about general pandemic-related stress and its impact on increased  
47 tobacco use, many participants also discussed stress specifically associated with working from home or  
48 being laid off. Indeed, the pandemic introduced a myriad of sources of stress to the general population,  
49 including layoffs, isolation measures, reduced income, and reduced job security [24]. Previous literature  
50 has found that increased stress and anxiety about employment and finances is associated with greater  
51 nicotine consumption [25]. In this vein, it is likely that nicotine users smoked or vaped more to cope  
52 with financial and employment-related stress, which reveals how nicotine users are particularly  
53 vulnerable from a health risk perspective in the context of job instability. It is also interesting that some  
54  
55  
56  
57  
58  
59  
60

1  
2  
3 nicotine users decided to quit or reduce their smoking or vaping in order to save money. In this vein,  
4 emphasizing the financial benefits of quitting may be particularly relevant in this context.  
5

6 The findings of this study indicate the need for interventions to incorporate elements that  
7 address the unique susceptibilities experienced by users, such as the effects of isolation, stress, and  
8 boredom, as these are traits and states that are likely to persist beyond a pandemic context. Examples  
9 of such elements may include tools and strategies such as gamification to incorporate distractions, or  
10 tailored financial incentives, such as saving money for something meaningful that the nicotine user may  
11 like to purchase. In addition, the findings emphasize the need to encourage and support quitting  
12 nicotine use by offering online and hybrid cessation services, as well as utilizing novel modalities for  
13 information dissemination (e.g., Instagram, Facebook, and TikTok ads, Zoom groups, app-based  
14 cessation programs) [26, 11]. This is important because the literature has demonstrated that the  
15 pandemic caused significant drops in traditional, in-person cessation program enrolments [26]. By  
16 implementing participant suggestions, many of the barriers stated by individuals could potentially be  
17 eliminated or minimized. Finally, when developing new programs for cessation, we must also ensure  
18 that people who face greater systemic barriers, such as Indigenous and rural populations, can access  
19 these supports [27].  
20  
21  
22  
23  
24

### 25 **Strengths and Limitations**

26 This research has several limitations. First, interviews are subject to recall and social desirability  
27 biases. Second, as participants were solely from BC, Canada, participants' experiences may not be  
28 representative of experiences in a broader group of nicotine users. In addition, it must be noted that BC  
29 implemented pandemic response measures differentially from other provinces, which may limit the  
30 transferability of the findings to individuals in areas where the response measures were different from  
31 that of BC. Third, since we did not directly ask questions about the COVID-19 pandemic, not all  
32 participants from the primary project provided their opinions. It is possible more participants would  
33 have provided in-depth information if intentional questions surrounding the pandemic had been  
34 incorporated into the original interviews. Fourth, due to our selection of keywords, it is possible some  
35 statements about COVID-19 and the pandemic could have been missed. Fifth, given that data were  
36 collected during a specific time period (May to August 2021), sociocultural and policy changes evolving  
37 with the pandemic may have continued to influence cessation needs beyond the scope of these findings.  
38 Finally, our sample may be unique in that participants may belong to a higher socioeconomic status than  
39 the general population of nicotine users worldwide as indicated by access to a desktop or mobile device  
40 and an Internet connection. Despite these limitations, this study has some noteworthy strengths. First,  
41 drawing secondary data from a very large primary study allowed for maximum variation across a range  
42 of sample characteristics, providing a rich dataset from which to develop themes. Next, our use of  
43 inductive qualitative methods enabled a detailed analytical approach. Finally, collecting rich interview  
44 data over months allowed us to capture nuanced, as well as consistent themes in the context of an ever-  
45 changing pandemic landscape in real time.  
46  
47  
48  
49  
50  
51  
52

### 53 **CONCLUSIONS**

54  
55  
56  
57  
58  
59  
60

1  
2  
3 This qualitative study provided a snapshot into the lived experiences, needs, and desires of  
4 nicotine users motivated to quit during the COVID-19 pandemic. While isolation from the pandemic lent  
5 to some facilitators to quitting (e.g., reduced exposure to social pressures), participants reported a  
6 broader number of barriers to quitting associated with isolation. In addition, stress, especially financial  
7 stress, associated with the pandemic played a critical role in disrupting cessation efforts. Cessation  
8 programming would benefit from considering these unique impacts of the pandemic on cessation.  
9  
10

## 11 12 **ACKNOWLEDGEMENTS**

13 We thank all the individuals who reported their experiences quitting nicotine use. We also thank  
14 Shaheer Khan, Kyla Christianson, and Christine Yang who assisted with initial data collection and  
15 analysis.  
16  
17

## 18 19 **COMPETING INTERESTS STATEMENT**

20 The authors have no conflicts of interest to declare.  
21

## 22 23 **FUNDING STATEMENT**

24 This work was supported by funding from the British Columbia Ministry of Health, via a BC Lung  
25 Foundation Research Agreement (grant#: #018471) and a Canadian Cancer Society Scholar Award  
26 (Prevention) (grant#: 707156).  
27  
28

## 29 30 **AUTHOR CONTRIBUTIONS**

31 RS oversaw participant recruitment, data collection, interview transcription, primary data analysis, and  
32 conceptualization of the manuscript. LS, as senior author, conceptualized and designed the greater  
33 project and research protocol, and obtained research funding. DR led conduction of secondary data  
34 analysis. RS and DR jointly developed the manuscript, with LS overseeing and providing feedback on  
35 draft versions. All authors have seen and approved the final version.  
36  
37

## 38 39 **PATIENT CONSENT**

40 Not required.  
41

## 42 43 **ETHICAL APPROVAL**

44 Behavioral Research Ethics Board at the University of British Columbia's Okanagan campus (#H21-  
45 00145).  
46

## 47 48 **DATA SHARING STATEMENT**

49 We have uploaded the semi-structured interview guide as a Supplementary File. To protect participant  
50 identities, we do not intend to share participant interview transcripts in a repository. All requests for  
51 data sharing may be directed to the authors.  
52  
53  
54  
55  
56  
57  
58  
59  
60

## REFERENCES

1. World Health Organization. Tobacco [Internet]. Who.int. World Health Organization: WHO; 2022. Available from: <https://www.who.int/news-room/fact-sheets/detail/tobacco>
2. Centers for Disease Control and Prevention. Smoking Cessation: Fast Facts [Internet]. CDC Tobacco Free. 2020 [cited 2022 Nov 3]. Available from: [https://www.cdc.gov/tobacco/data\\_statistics/fact\\_sheets/cessation/smoking-cessation-fast-facts/index.html](https://www.cdc.gov/tobacco/data_statistics/fact_sheets/cessation/smoking-cessation-fast-facts/index.html)
3. Castro Y, Heck K, Forster JL, Widome R, Cubbin C. Social and Environmental Factors Related to Smoking Cessation among Mothers: Findings from the Geographic Research on Wellbeing (GROW) Study. *American Journal of Health Behavior* [Internet]. 2015 Nov 1 [cited 2022 Nov 3];39(6):809–22. Available from: <https://www.ncbi.nlm.nih.gov/pmc/articles/PMC4603443/>
4. Statistics Canada. Canadian Tobacco and Nicotine Survey, 2021 [Internet]. [www150.statcan.gc.ca](http://www150.statcan.gc.ca). Government of Canada; 2022 [cited 2022 Nov 3]. Available from: <https://www150.statcan.gc.ca/n1/daily-quotidien/220505/dq220505c-eng.htm>
5. Zajacova A, Jehn A, Stackhouse M, Denice P, Ramos H. Changes in health behaviours during early COVID-19 and socio-demographic disparities: a cross-sectional analysis. *Canadian Journal of Public Health*. 2020 Nov 10;111(6):953–62.
6. Melamed OC, Zawertailo L, Schwartz R, Buckley L, Selby P. Commentary - Protecting vulnerable groups from tobacco-related harm during and following the COVID-19 pandemic. *Health Promotion and Chronic Disease Prevention in Canada* [Internet]. 2021 Jun [cited 2022 Nov 3];41(10). Available from: <https://www.canada.ca/en/public-health/services/reports-publications/health-promotion-chronic-disease-prevention-canada-research-policy-practice/vol-41-no-10-2021/protecting-vulnerable-groups-tobacco-harm-covid-19-pandemic.html>
7. Statistics Canada. StatCan COVID-19: Data to Insights for a Better Canada [Internet]. StatCan COVID-19: Data to Insights for a Better Canada. Government of Canada; 2022 [cited 2022 Nov 2]. Available from: <https://www150.statcan.gc.ca/n1/en/catalogue/45280001>
8. Statistics Canada. Canadian Tobacco and Nicotine Survey, 2020 [Internet]. [www150.statcan.gc.ca](http://www150.statcan.gc.ca). Government of Canada; 2021 [cited 2022 Nov 3]. Available from: <https://www150.statcan.gc.ca/n1/daily-quotidien/210317/dq210317b-eng.htm>
9. Kayhan Tetik B, Gedik Tekinemre I, Taş S. The Effect of the COVID-19 Pandemic on Smoking Cessation Success. *Journal of Community Health* [Internet]. 2020 Jul 8 [cited 2021 Mar 21];46(3). Available from: <https://www.ncbi.nlm.nih.gov/pmc/articles/PMC7340767/>
10. Statistics Canada. Canadian Tobacco and Nicotine Survey, 2019 [Internet]. [www150.statcan.gc.ca](http://www150.statcan.gc.ca). Government of Canada; 2020 [cited 2022 Nov 3]. Available from: <https://www150.statcan.gc.ca/n1/daily-quotidien/200305/dq200305a-eng.htm>
11. Elling J, Crutzen R, Talhout R, De Vries H. Tobacco smoking and smoking cessation in times of COVID-19. *Tobacco Prevention & Cessation* [Internet]. 2020 Jul 1 [cited 2020 Aug 2];6(July). Available from: <https://www.ncbi.nlm.nih.gov/pmc/articles/PMC7549523/>
12. Kopelovich SL, Monroe-DeVita M, Buck BE, Brenner C, Moser L, Jarskog LF, et al. Community Mental Health Care Delivery During the COVID-19 Pandemic: Practical Strategies for Improving Care for People with Serious Mental Illness. *Community Mental Health Journal* [Internet]. 2020

- 1  
2  
3 Jun 19 [cited 2022 Nov 3];57(3). Available from:  
4 <https://www.ncbi.nlm.nih.gov/pmc/articles/PMC7304659/>  
5  
6 13. Bandi P, Asare S, Majmundar A, Xue Z, Han X, Westmaas JL, et al. Changes in Smoking Cessation–  
7 Related Behaviors Among US Adults During the COVID-19 Pandemic. *JAMA Network Open*  
8 [Internet]. 2022 Aug 1 [cited 2022 Nov 3];5(8):e2225149. Available from:  
9 <https://jamanetwork.com/journals/jamanetworkopen/fullarticle/2794810>  
10  
11 14. Bommele J, Hopman P, Walters BH, Geboers C, Croes E, Fong GT, et al. The double-edged  
12 relationship between COVID-19 stress and smoking: Implications for smoking cessation. *Tobacco*  
13 *Induced Diseases* [Internet]. 2020 Jul 27 [cited 2022 Nov 3];18(63). Available from:  
14 <https://www.ncbi.nlm.nih.gov/pmc/articles/PMC7386200/>  
15  
16 15. Heaton J. *Reworking qualitative data*. London; Thousand Oaks, California: Sage; 2004.  
17  
18 16. O'Brien BC, Harris IB, Beckman TJ, Reed DA, Cook DA. Standards for reporting qualitative  
19 research: a synthesis of recommendations. *Acad Med*. 2014;89(9):1245-1251.  
20  
21 17. Elo S, Kyngäs H. The qualitative content analysis process. *Journal of Advanced Nursing* [Internet].  
22 2008 [cited 2022 Nov 3];62(1):107–15. Available from:  
23 [https://onlinelibrary.wiley.com/doi/full/10.1111/j.1365-](https://onlinelibrary.wiley.com/doi/full/10.1111/j.1365-2648.2007.04569.x?casa_token=3D_JuR1WRpIAAAA%3ADg1qqPLGNpHDXG4R4i19FDoQmSJl1KljhvQ3-L3UuLuiB5pcxwgoiLN4Az4YtsiXjCO_lyq1o_wMQ)  
24 [2648.2007.04569.x?casa\\_token=3D\\_JuR1WRpIAAAA%3ADg1qqPLGNpHDXG4R4i19FDoQmSJl1](https://onlinelibrary.wiley.com/doi/full/10.1111/j.1365-2648.2007.04569.x?casa_token=3D_JuR1WRpIAAAA%3ADg1qqPLGNpHDXG4R4i19FDoQmSJl1KljhvQ3-L3UuLuiB5pcxwgoiLN4Az4YtsiXjCO_lyq1o_wMQ)  
25 [KljhvQ3-L3UuLuiB5pcxwgoiLN4Az4YtsiXjCO\\_lyq1o\\_wMQ](https://onlinelibrary.wiley.com/doi/full/10.1111/j.1365-2648.2007.04569.x?casa_token=3D_JuR1WRpIAAAA%3ADg1qqPLGNpHDXG4R4i19FDoQmSJl1KljhvQ3-L3UuLuiB5pcxwgoiLN4Az4YtsiXjCO_lyq1o_wMQ)  
26  
27 18. Statistics Canada. Alcohol and cannabis use during the pandemic: Canadian Perspectives Survey  
28 Series 6 [Internet]. [www150.statcan.gc.ca](http://www150.statcan.gc.ca). Government of Canada; 2021 [cited 2022 Nov 3].  
29 Available from: <https://www150.statcan.gc.ca/n1/daily-quotidien/210304/dq210304a-eng.htm>  
30  
31 19. Gonzalez M, Epperson AE, Halpern-Felsher B, Halliday DM, Song AV. Smokers Are More Likely to  
32 Smoke More after the COVID-19 California Lockdown Order. *International Journal of*  
33 *Environmental Research and Public Health* [Internet]. 2021 Mar 5 [cited 2022 Nov 3];18(5):2582.  
34 Available from: <https://www.ncbi.nlm.nih.gov/pmc/articles/PMC7967350/>  
35  
36 20. Smith B, Lim M. How the COVID-19 pandemic is focusing attention on loneliness and social  
37 isolation. *Public Health Research & Practice* [Internet]. 2020 [cited 2022 Nov 3];30(2). Available  
38 from: <https://pdfs.semanticscholar.org/d4b8/7055101c6b3988c43eb3a53f59b8be68e986.pdf>  
39  
40 21. Ritchie D, Amos A, Martin C. Public places after smoke-free—A qualitative exploration of the  
41 changes in smoking behaviour. *Health & Place* [Internet]. 2010 May [cited 2022 Nov  
42 3];16(3):461–9. Available from:  
43 <https://www.sciencedirect.com/science/article/abs/pii/S1353829209001476>  
44  
45 22. Struik LL, Bottorff JL, Baskerville NB, Oliffe JL. The Crush the Crave Quit Smoking App and Young  
46 Adult Smokers: Qualitative Case Study of Affordances. *JMIR mHealth and uHealth* [Internet].  
47 2018 Jun 8 [cited 2022 Nov 3];6(6):e9489. Available from:  
48 <https://mhealth.jmir.org/2018/6/e134/>  
49  
50 23. Soulakova JN, Tang C-Y, Leonardo SA, Taliaferro LA. Motivational Benefits of Social Support and  
51 Behavioural Interventions for Smoking Cessation. *Journal of Smoking Cessation* [Internet]. 2018  
52 Jan 21 [cited 2022 Nov 3];13(4):216–26. Available from:  
53 <https://www.ncbi.nlm.nih.gov/pmc/articles/PMC6459678/>  
54  
55 24. World Health Organization. COVID-19 pandemic triggers 25% increase in prevalence of anxiety  
56 and depression worldwide [Internet]. News. World Health Organization; 2022 [cited 2022 Nov  
57  
58  
59  
60



- 1  
2  
3 3]. Available from: <https://www.who.int/news/item/02-03-2022-covid-19-pandemic-triggers-25-increase-in-prevalence-of-anxiety-and-depression-worldwide>  
4  
5  
6 25. Kalkhoran SM, Levy DE, Rigotti NA. Smoking and E-Cigarette Use Among U.S. Adults During the  
7 COVID-19 Pandemic. *American Journal of Preventive Medicine* [Internet]. 2021 Oct [cited 2022  
8 Nov 3];62(3). Available from: <https://doi.org/10.1016/j.amepre.2021.08.018>  
9  
10 26. Ahluwalia IB, Myers M, Cohen JE. COVID-19 pandemic: an opportunity for tobacco use cessation.  
11 *The Lancet Public Health* [Internet]. 2020 Nov 1 [cited 2022 Nov 3];5(11):e577. Available from:  
12 [https://www.thelancet.com/journals/lanpub/article/PIIS2468-2667\(20\)30236-X/fulltext](https://www.thelancet.com/journals/lanpub/article/PIIS2468-2667(20)30236-X/fulltext)  
13  
14 27. Minian N, Veldhuizen S, Tanzini E, Duench S, deRuiter WK, Barker M, et al. Changes in the reach  
15 of a smoking cessation program in Ontario, Canada, during the COVID-19 pandemic: a cross-  
16 sectional study. *Canadian Medical Association Open Access Journal* [Internet]. 2021 Oct 1 [cited  
17 2022 Nov 3];9(4):E957–65. Available from: <https://www.cmajopen.ca/content/9/4/E957>  
18  
19  
20  
21  
22  
23  
24  
25  
26  
27  
28  
29  
30  
31  
32  
33  
34  
35  
36  
37  
38  
39  
40  
41  
42  
43  
44  
45  
46  
47  
48  
49  
50  
51  
52  
53  
54  
55  
56  
57  
58  
59  
60

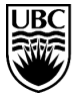

## QUITNOW RESEARCH STUDY PROTOCOL

### INTERVIEW GUIDE FOR NON-INDIGENOUS CURRENT QUITNOW USERS

#### Preparation (using Zoom for interviews)

1. AV check
2. Recording ready (recording app on phone)
3. Materials for sharing uploaded (questionnaire, interview guide, consent form)
4. Facilitator notes
5. Ensure consent for all participants has been received
6. Make sure phone calls are blocked from phone

#### NOTE:

- Try your best to interview the participant as close to 1 hour as you can
  - Take your time – if you are not rushed, then participants will feel less rushed to answer your questions
  - Pause for a few seconds after participants answer – this will prompt participants to add more to their answer. Saying something like “*mhm...*” after they answer as if you are expecting them to say more.
  - Encourage participants to take their time with their responses.
- Encourage creative thinking
  - Do not limit participants with what they believe is possible. People do their best creative thinking when they do not think about practical constraints.
- Try to ask as many open-ended (vs. Closed-ended) questions as possible
  - Example of a closed-ended question: *Do you like that?*
  - Example of an open-ended question: *What do you like about that?*
- Phrases you can use to prompt participants to talk more:
  - *Tell me more about \_\_\_\_.*
  - *How can you see \_\_\_\_ being incorporated into the website?*
  - *How can you see \_\_\_\_ (flaw of the website) \_\_\_\_ being fixed?*
  - *What else?*
- Responses to difficult answers:
  - Participant: there’s nothing I don’t like about it! It’s great!
    - Answer: “*What’s so great about it?*”
    - Answer: “*What can make it better?*”
    - Answer: “*I’m glad you like it so much! We’re also interested in what you don’t like about the website, as insignificant as it may be – where do you think the website can improve?*”
    - Answer: “*On a scale of 1-10, how confident do you think this website will be in helping you quit?*” - if below 10, ask “*how could the website be changed so that your answer is 10?*”

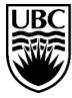

### Welcome/Instructions for Facilitators (5 minutes)

1. Hello, thank you for taking the time
2. Introduce yourself
3. Questionnaire – thank them for completing it
  - o \*If they haven't had a chance to do it, screen share the questionnaire and complete it with them.
4. Purpose of the study: to invite BC residents to provide their input of the smoking cessation service, QuitNow.
5. Consent – ongoing process (can discontinue at any point)
6. Questions?
7. Interview is being recorded – is that okay? \*start recording\*
8. Acknowledge that this research is taking place on the unceded territory of the Syilx/Okanagan people.
9. Remind participants that we are not QuitNow employees and that they can share any type of feedback.
10. Encourage participants to open up the website while they are conducting the interview

### QuitNow Questions (~30 minutes)

*We are now going to ask you to walk through the QuitNow website and talk about what aspects of it worked well and which ones did not. So, to start...*

1. Do you/have you used QuitNow on your mobile device and/or laptop?
2. How did you hear about QuitNow?
3. How have you used QuitNow to help you quit?
4. Why did you start using QuitNow? What kept you coming back? OR Why did you not use it/stop using it?
5. What about QuitNow do you like the most?
  - a. Which aspects do you use the most?
  - b. How did (said aspects) help you in reaching your goals of reducing or quitting?
  - c. Can you tell me about a time when (said aspect) helped you?
  - d. How could this aspect be improved/even better?
6. What about QuitNow do you not like?
  - a. What were its limitations in relation to your efforts to reduce/quit?
  - b. What were you hoping for instead?
  - c. How could this limitation be addressed (e.g., should it be removed, or could it be improved)?
7. How would you like to receive support on QuitNow?
8. Would you want the QuitNow forum to have discussion threads?
  - a. If you were at week 1, would you want to hear about what others did during week 12?
  - b. Alternatively, would you like to see threads based on themes (e.g., struggles, successes, triggers, motivations, etc.)?
  - c. Or do you prefer to just have an open forum?
9. What types of information would you like to see on QuitNow (e.g., benefits of quitting, consequences of not quitting, stories from others, tips to stay nicotine-free, suggestions for distractions, what to expect, etc.)?
10. What do you think of incorporating support for quitting e-cigarettes on QuitNow?



- a. How should it be different to cigarette cessation support?
- b. How should it be similar?
11. What additional features would you like to see on QuitNow?
12. Do you have any suggestions for improving the look and feel of QuitNow?
13. Would you recommend QuitNow to your friends/family? Why or why not?
14. How could we get the word out that QuitNow exists?
15. What might be some barriers (e.g., stress, friends or family who smoke)? How could/should these be mitigated by QuitNow?
16. Outside of QuitNow, what are other aspects of your life that help facilitate reducing/quitting (e.g., social support, willpower, etc.)? How could/should these be incorporated into QuitNow?
17. For current QuitNow users: You have told me that you have [reduced/quit/no change in] smoking since you were first introduced to QuitNow. What do you think has been the biggest influencing factor? Overall, how helpful has QuitNow been to you?
18. Thinking about what we have talked about so far, if you could provide the developers of QuitNow with some advice, what would it be?
19. If you could have anything you wanted (i.e., in an ideal world), what would you want QuitNow have/do for you?
20. If we were to do a follow up study with a focus group, would you be interested in taking part in that? We will contact you if we do this.
21. Would you like to receive the results of the study once it is published?

#### **Closing: final comments (5 minutes)**

Thank you for joining me today and helping us understand more about what we can do to improve BC's largest smoking cessation service. This will help us to tailor the website so that it is better able to meet the needs of BC residents who are trying to quit smoking or vaping. We are at the end of this session but before we leave, do you have any final thoughts that you would like to share?

- Which vendor would you like to receive your \$50 honorarium for?
- Would you live to be contacted to participate in a follow-up study?
- Would you like to receive the results of the study once they are published?

#### **After the Interview**

1. Update spreadsheet (OneDrive):
  - a. Ensure participant information is updated (i.e., smoke status, vape status, QuitNow user, age, gender, consent, questionnaire, interview, honorarium, agree to follow-up contact, would like to receive the results of the study)
  - b. Record if they would like to participate in a follow up focus group
  - c. Record if they would like to receive results of the study
2. Upload to OneDrive
  - a. Recording
  - b. Questionnaire
3. \*\*Ensure files are labelled with participant ID, gender, and QuitNow status \*\*
  - a. E.g., "#23, M, Y" for participant number 23, male, QuitNow user (Y)
  - b. E.g., "#23, F, N" for participant number 23, female, QuitNow non-user

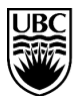

## INTERVIEW GUIDE FOR NON-INDIGENOUS POTENTIAL QUITNOW USERS

### Preparation (using Zoom for interviews)

1. AV check
2. Recording ready (recording app on phone)
3. Materials for sharing uploaded (questionnaire, interview guide, consent form)
4. Facilitator notes
5. Ensure consent for all participants has been received
6. Make sure phone calls are blocked from phone

### NOTE:

- Try your best to interview the participant as close to 1 hour as you can
  - Take your time – if you are not rushed, then participants will feel less rushed to answer your questions
  - Pause for a few seconds after participants answer – this will prompt participants to add more to their answer. Saying something like “*mhm...*” after they answer as if you are expecting them to say more.
  - Encourage participants to take their time with their responses.
- Encourage creative thinking
  - Do not limit participants with what they believe is possible. People do their best creative thinking when they do not think about practical constraints.
- Try to ask as many open-ended (vs. Closed-ended) questions as possible
  - Example of a closed-ended question: *Do you like that?*
  - Example of an open-ended question: *What do you like about that?*
- Phrases you can use to prompt participants to talk more:
  - *Tell me more about \_\_\_\_.*
  - *How can you see \_\_\_\_ being incorporated into the website?*
  - *How can you see \_\_\_\_ (flaw of the website) \_\_\_\_ being fixed?*
  - *What else?*
- Responses to difficult answers:
  - Participant: there’s nothing I don’t like about it! It’s great!
    - Answer: *“What’s so great about it?”*
    - Answer: *“What can make it better?”*
    - Answer: *“I’m glad you like it so much! We’re also interested in what you don’t like about the website, as insignificant as it may be – where do you think the website can improve?”*

Answer: *“On a scale of 1-10, how confident do you think this website will be in helping you quit?”* - if below 10, ask *“how could the website be changed so that your answer is 10?”*

### Welcome/Instructions for Facilitators (5 minutes)

1. Hello, thank you for taking the time
2. Introduce yourself
3. Questionnaire – thank them for completing it



- \*If they haven't had a chance to do it, screen share the questionnaire and complete it with them.
4. Purpose of the study: to invite BC residents to provide their input of the smoking cessation service, QuitNow.
5. Consent – ongoing process (can discontinue at any point)
6. Questions?
7. Interview is being recorded – is that okay? \*start recording\*
8. Acknowledge that this research is taking place on the unceded territory of the Syilx/Okanagan people.
9. Remind participants that we are not QuitNow employees and that they can share any type of feedback.
10. Encourage participants to open up the website while they are conducting the interview

### QuitNow Questions (~30 minutes)

*Before this interview, you were asked to take a look at the QuitNow website, so I want to now hear about your reactions to the website and what it currently offers.*

1. Let's start with the overall look and feel.
  - a. What is your initial reaction?
  - b. How could it be improved?
2. What aspects of the website did you like?
  - a. What would you find helpful in quitting smoking?
  - b. What would keep you coming back?
3. What did you not like?
  - a. What are the major limitations of the site?
  - b. What makes you not want to come back to it?
4. How would you like to receive support on QuitNow?
5. Would you want the QuitNow forum to have discussion threads?
  - a. If you were at week 1, would you want to hear about what others did during week 12?
  - b. Alternatively, would you like to see threads based on themes (e.g., struggles, successes, triggers, motivations, etc.)?
  - c. Or do you prefer to just have an open forum?
6. What types of information would you like to see on QuitNow (e.g., benefits of quitting, consequences of not quitting, stories from others, tips to stay nicotine-free, suggestions for distractions, what to expect, etc.)?
7. What do you think of incorporating support for quitting e-cigarettes on QuitNow?
  - a. How should it be different to cigarette cessation support?
  - b. How should it be similar?
8. Outside of QuitNow, what are other aspects in your life that help facilitate reducing/quitting (e.g., social support, willpower, etc.)? How could/should these be incorporated into QuitNow?
9. What additional features would you like to see on QuitNow?
10. Thinking about what we have talked about so far, if you could provide the developers of QuitNow with some advice, what would it be?
11. Would you recommend QuitNow to your friends/family? Why or why not?
12. What might be some barriers (e.g., stress, friends/family who smoke) to quitting? How could/should these be mitigated by QuitNow?



**a place of mind**  
THE UNIVERSITY OF BRITISH COLUMBIA

13. Would you be more likely to use QuitNow on your mobile device or laptop?
14. If you could have anything you wanted, what would you want QuitNow have/do for you?
15. How could we get the word out that QuitNow exists?
16. If we were to do a follow up study with a focus group, would you be interested in taking part in that? We will contact you if we do this.
17. Would you like to receive the results of the study once it is published?

#### **Closing: final comments (5 minutes)**

Thank you for joining me today and helping us understand more about what we can do to improve BC's largest smoking cessation service. This will help us to tailor the website so that it is better able to meet the needs of BC residents who are trying to quit smoking or vaping. We are at the end of this session but before we leave, do you have any final thoughts that you would like to share?

- Which vendor would you like to receive your \$50 honorarium for?
- Would you like to be contacted to participate in a follow-up study?
- Would you like to receive the results of the study once they are published?

#### **After the Interview**

1. Update spreadsheet (OneDrive):
  - a. Ensure participant information is updated (i.e., smoke status, vape status, QuitNow user, age, gender, consent, questionnaire, interview, honorarium, agree to follow-up, would like results of the study)
  - b. Record if they would like to participate in a follow up focus group
  - c. Record if they would like to receive results of the study
2. Upload to OneDrive
  - a. Recording
  - b. Questionnaire
3. \*\*Ensure files are labelled with participant ID, gender, and QuitNow status \*\*
  - a. E.g., "#23, M, Y" for participant number 23, male, QuitNow user (Y)
  - b. E.g., "#23, F, N" for participant number 23, female, QuitNow non-user



## INTERVIEW GUIDE FOR INDIGENOUS CURRENT QUITNOW USERS

### Preparation (using Zoom for interviews)

1. AV check
2. Recording ready (recording app on phone)
3. Materials for sharing uploaded (questionnaire, interview guide, consent form)
4. Facilitator notes
5. Ensure consent for all participants has been received
6. Make sure phone calls are blocked from phone

### Welcome/Instructions for Facilitators (5 minutes)

1. Hello, thank you for taking the time
2. Introduce yourself
3. Questionnaire – thank them for completing it; if they haven't had a chance to do it, go through it on share screen
4. Purpose of the study: to invite BC residents to provide their input of the smoking cessation service, QuitNow.
5. Questions?
6. Interview is being recorded – is that okay?
7. Acknowledge that this research is taking place on the unceded territory of the Syilx/Okanagan people.

### QuitNow Questions (~50 minutes)

*We are now going to ask you to walk through the QuitNow website and talk about what aspects of it worked well and which ones did not. So, to start...*

1. Do you/have you used QuitNow on your mobile device and/or laptop?
2. How did you hear about QuitNow?
3. How have you used QuitNow to help you quit?
4. Why did you start using QuitNow? What kept you coming back? OR Why did you not use it/stop using it?
5. We understand that you identify as Indigenous. Which nation do you belong to?
6. We understand that tobacco is considered a medicine in some Indigenous cultures. Is that the case with your nation as well?
  - a. How should this be honored in QuitNow?
7. What other aspects of your nation's culture or of Indigenous culture in general might be honored in QuitNow?
8. What about QuitNow do you like the most?
  - a. Which aspects do you use the most?
  - b. How (said aspects) help you in reaching your goals of reducing or quitting?
  - c. Can you tell me about a time when (said aspect) helped you?
  - d. How could this aspect be improved/even better?
  - e. What aspects of QuitNow resonate with your nation's culture or Indigenous culture in general as you understand it?





9. What about QuitNow do you not like?
  - a. What were its limitations in relation to your efforts to reduce/quit?
  - b. What were you hoping for instead?
  - c. How could this limitation be addressed (e.g., should it be removed, or could it be improved)?
  - d. What aspects of QuitNow do not resonate with your nation's culture or Indigenous culture in general as you understand it? How could this be addressed?
10. How would you like to receive social support on QuitNow?
11. Would you want the QuitNow forum to have discussion threads?
  - a. If you were at week 1, would you want to hear about what others did during week 12?
  - b. Alternatively, would you like to see threads based on themes (e.g., struggles, successes, triggers, motivations, etc.)?
  - c. Or do you prefer to just have an open forum?
12. What types of information would you like to see on QuitNow (e.g., benefits of quitting, consequences of not quitting, stories from others, tips to stay nicotine-free, suggestions for distractions, what to expect, etc.)?
13. What do you think of incorporating support for quitting e-cigarettes (e.g., Juul) on QuitNow?
  - a. How should it be different to cigarette cessation support?
  - b. How should it be similar?
14. What additional features would you like to see on QuitNow?
15. Do you have any suggestions for improving the look and feel of QuitNow?
16. Would you recommend QuitNow to your friends/family? Why or why not?
17. How could we get the word out that QuitNow exists?
18. Outside of QuitNow, what are other aspects in your life that help facilitate reducing/quitting (e.g., social support, willpower, etc.)? How could/should these be incorporated into QuitNow?
19. What might be some barriers (e.g., stress, friends or family who smoke)? How could/should these be mitigated by QuitNow?
20. For QuitNow users: You have told me that you have [reduced/quit/no change in] smoking since you were first introduced to QuitNow. What do you think has been the biggest influencing factor? Overall, how helpful has QuitNow been to you?
21. Thinking about what we have talked about so far, if you could provide the developers of QuitNow with some advice, what would it be?
22. If you could have anything you wanted (i.e., in an ideal world), what would you want QuitNow have/do for you?

**Closing: final comments (5 minutes)**

Thank you for joining me today and helping us understand more about what we can do to improve BC's largest smoking cessation service. This will help us to tailor the website so that it is better able to meet the needs of BC residents who are trying to quit smoking or vaping. We are at the end of this session but before we leave, do you have any final thoughts that you would like to share?

way' limlæmt, | thank you



## INTERVIEW GUIDE FOR INDIGENOUS POTENTIAL QUITNOW USERS

### Preparation (using Zoom for interviews)

1. AV check
2. Recording ready (recording app on phone)
3. Materials for sharing uploaded (questionnaire, interview guide, consent form)
4. Facilitator notes
5. Ensure consent for all participants has been received
6. Make sure phone calls are blocked from phone

### Welcome/Instructions for Facilitators (5 minutes)

1. Hello, thank you for taking the time
2. Introduce yourself
3. Questionnaire – thank them for completing it; if they haven't had a chance to do it, go through it on share screen
4. Purpose of the study: to invite BC residents to provide their input of the smoking cessation service, QuitNow.
5. Questions?
6. Confirm that they have looked through the QuitNow website
7. Interview is being recorded – is that okay?
8. Acknowledge that this research is taking place on the unceded territory of the Syilx/Okanagan people.

### QuitNow Questions (~30 minutes)

*Before this interview, you were asked to take a look at the QuitNow website, so I want to now hear about your reactions to the website and what it currently offers.*

1. Let's start with the overall look and feel.
  - a. What is your initial reaction?
  - b. How could it be improved?
2. What aspects of the website did you like?
  - a. What would you find helpful in quitting smoking?
  - b. What would keep you coming back?
3. What did you not like?
  - a. What are the major limitations of the site?
  - b. What makes you not want to come back to it?
4. How would you like to receive support on QuitNow?
5. Would you want the QuitNow forum to have discussion threads?
  - a. If you were at week 1, would you want to hear about what others did during week 12?
  - b. Alternatively, would you like to see threads based on themes (e.g., struggles, successes, triggers, motivations, etc.)?
  - c. Or do you prefer to just have an open forum?
6. What types of information would you like to see on QuitNow (e.g., benefits of quitting, consequences of not quitting, stories from others, tips to stay nicotine-free, suggestions for distractions, what to expect, etc.)?



**a place of mind**  
THE UNIVERSITY OF BRITISH COLUMBIA

7. What do you think of incorporating support for quitting e-cigarettes (e.g., Juul) on QuitNow?
  - a. How should it be different to cigarette cessation support?
  - b. How should it be similar?
8. You mentioned that you identify as Indigenous. Which nation do you belong to?
9. We understand that tobacco is considered a medicine in some Indigenous cultures. Is that the case with your nation as well?
  - a. How should this be honored in QuitNow?
10. What other aspects of your nation's culture or of Indigenous culture in general might be honored in QuitNow?
11. Outside of QuitNow, what are other aspects in your life that help facilitate reducing/quitting (e.g., social support, willpower, etc.)? How could/should these be incorporated into QuitNow?
12. What additional features would you like to see on QuitNow?
13. Thinking about what we have talked about so far, if you could provide the developers of QuitNow with some advice, what would it be?
14. Would you recommend QuitNow to your friends/family? Why or why not?
15. What might be some barriers (e.g., stress, friends/family who smoke) to quitting? How could/should these be mitigated by QuitNow?
16. Would you be more likely to use QuitNow on your mobile device or laptop?
17. If you could have anything you wanted, what would you want QuitNow have/do for you?
18. How could we get the word out that QuitNow exists?
19. If we were to do a follow up study with a focus group, would you be interested in taking part in that? We will contact you if we do this.
20. Would you like to receive the results of the study once it is published?

**Closing: final comments (5 minutes)**

Thank you for joining me today and helping us understand more about what we can do to improve BC's largest smoking cessation service. This will help us to tailor the website so that it is better able to meet the needs of BC residents who are trying to quit smoking or vaping. We are at the end of this session but before we leave, do you have any final thoughts that you would like to share?

way' limlæmt,| thank you

# Reporting checklist for qualitative study.

Based on the SRQR guidelines.

## EXPERIENCES OF NICOTINE USERS MOTIVATED TO QUIT DURING THE COVID-19 PANDEMIC: A SECONDARY QUALITATIVE ANALYSIS

### AUTHORS

-Ramona H. Sharma, BSc, MSW Student - School of Social Work, The University of British Columbia (Okanagan Campus), Kelowna, Canada

-Danielle Rodberg, BSN Student - School of Nursing, The University of British Columbia (Okanagan Campus), Kelowna, Canada

-Laura L. Struik, PhD, Assistant Professor - School of Nursing, The University of British Columbia (Okanagan Campus), Kelowna, Canada

|                     | Reporting Item                                                                                                                                                                                                                                          | Page Number |
|---------------------|---------------------------------------------------------------------------------------------------------------------------------------------------------------------------------------------------------------------------------------------------------|-------------|
| <b>Title</b>        |                                                                                                                                                                                                                                                         |             |
|                     | <a href="#">#1</a> Concise description of the nature and topic of the study identifying the study as qualitative or indicating the approach (e.g. ethnography, grounded theory) or data collection methods (e.g. interview, focus group) is recommended | 1-4         |
| <b>Abstract</b>     |                                                                                                                                                                                                                                                         |             |
|                     | <a href="#">#2</a> Summary of the key elements of the study using the abstract format of the intended publication; typically includes background, purpose, methods, results and conclusions                                                             | 2           |
| <b>Introduction</b> |                                                                                                                                                                                                                                                         |             |
| Problem formulation | <a href="#">#3</a> Description and significance of the problem / phenomenon studied: review of relevant theory and empirical work; problem statement                                                                                                    | 3-4         |

|                                             |                     |                                                                                                                                                                                                                                                                                                                                                                                                                                                                                                                                                                                                                                      |     |
|---------------------------------------------|---------------------|--------------------------------------------------------------------------------------------------------------------------------------------------------------------------------------------------------------------------------------------------------------------------------------------------------------------------------------------------------------------------------------------------------------------------------------------------------------------------------------------------------------------------------------------------------------------------------------------------------------------------------------|-----|
| Purpose or research question                | <a href="#">#4</a>  | Purpose of the study and specific objectives or questions                                                                                                                                                                                                                                                                                                                                                                                                                                                                                                                                                                            | 4   |
| <b>Methods</b>                              |                     |                                                                                                                                                                                                                                                                                                                                                                                                                                                                                                                                                                                                                                      |     |
| Qualitative approach and research paradigm  | <a href="#">#5</a>  | Qualitative approach (e.g. ethnography, grounded theory, case study, phenomenology, narrative research) and guiding theory if appropriate; identifying the research paradigm (e.g. postpositivist, constructivist / interpretivist) is also recommended; rationale. The rationale should briefly discuss the justification for choosing that theory, approach, method or technique rather than other options available; the assumptions and limitations implicit in those choices and how those choices influence study conclusions and transferability. As appropriate the rationale for several items might be discussed together. | 4   |
| Researcher characteristics and reflexivity  | <a href="#">#6</a>  | Researchers' characteristics that may influence the research, including personal attributes, qualifications / experience, relationship with participants, assumptions and / or presuppositions; potential or actual interaction between researchers' characteristics and the research questions, approach, methods, results and / or transferability                                                                                                                                                                                                                                                                                 | 4-5 |
| Context                                     | <a href="#">#7</a>  | Setting / site and salient contextual factors; rationale                                                                                                                                                                                                                                                                                                                                                                                                                                                                                                                                                                             | 3-5 |
| Sampling strategy                           | <a href="#">#8</a>  | How and why research participants, documents, or events were selected; criteria for deciding when no further sampling was necessary (e.g. sampling saturation); rationale                                                                                                                                                                                                                                                                                                                                                                                                                                                            | 4   |
| Ethical issues pertaining to human subjects | <a href="#">#9</a>  | Documentation of approval by an appropriate ethics review board and participant consent, or explanation for lack thereof; other confidentiality and data security issues                                                                                                                                                                                                                                                                                                                                                                                                                                                             | 4   |
| Data collection methods                     | <a href="#">#10</a> | Types of data collected; details of data collection procedures including (as appropriate) start and stop dates of data collection and analysis, iterative                                                                                                                                                                                                                                                                                                                                                                                                                                                                            | 4-5 |

|    |                              |                     |                                                          |
|----|------------------------------|---------------------|----------------------------------------------------------|
| 1  |                              |                     |                                                          |
| 2  |                              |                     |                                                          |
| 3  |                              |                     |                                                          |
| 4  |                              |                     | process, triangulation of sources / methods, and         |
| 5  |                              |                     | modification of procedures in response to evolving       |
| 6  |                              |                     | study findings; rationale                                |
| 7  |                              |                     |                                                          |
| 8  | Data collection              | <a href="#">#11</a> | Description of instruments (e.g. interview guides,       |
| 9  | instruments and              |                     | questionnaires) and devices (e.g. audio recorders)       |
| 10 | technologies                 |                     | used for data collection; if / how the instruments(s)    |
| 11 |                              |                     | changed over the course of the study                     |
| 12 |                              |                     |                                                          |
| 13 |                              |                     |                                                          |
| 14 | Units of study               | <a href="#">#12</a> | Number and relevant characteristics of participants,     |
| 15 |                              |                     | documents, or events included in the study; level of     |
| 16 |                              |                     | participation (could be reported in results)             |
| 17 |                              |                     |                                                          |
| 18 |                              |                     |                                                          |
| 19 | Data processing              | <a href="#">#13</a> | Methods for processing data prior to and during          |
| 20 |                              |                     | analysis, including transcription, data entry, data      |
| 21 |                              |                     | management and security, verification of data            |
| 22 |                              |                     | integrity, data coding, and anonymisation /              |
| 23 |                              |                     | deidentification of excerpts                             |
| 24 |                              |                     |                                                          |
| 25 |                              |                     |                                                          |
| 26 | Data analysis                | <a href="#">#14</a> | Process by which inferences, themes, etc. were           |
| 27 |                              |                     | identified and developed, including the researchers      |
| 28 |                              |                     | involved in data analysis; usually references a specific |
| 29 |                              |                     | paradigm or approach; rationale                          |
| 30 |                              |                     |                                                          |
| 31 |                              |                     |                                                          |
| 32 | Techniques to enhance        | <a href="#">#15</a> | Techniques to enhance trustworthiness and credibility    |
| 33 | trustworthiness              |                     | of data analysis (e.g. member checking, audit trail,     |
| 34 |                              |                     | triangulation); rationale                                |
| 35 |                              |                     |                                                          |
| 36 |                              |                     |                                                          |
| 37 | <b>Results/findings</b>      |                     |                                                          |
| 38 |                              |                     |                                                          |
| 39 | Syntheses and                | <a href="#">#16</a> | Main findings (e.g. interpretations, inferences, and     |
| 40 | interpretation               |                     | themes); might include development of a theory or        |
| 41 |                              |                     | model, or integration with prior research or theory      |
| 42 |                              |                     |                                                          |
| 43 |                              |                     |                                                          |
| 44 | Links to empirical data      | <a href="#">#17</a> | Evidence (e.g. quotes, field notes, text excerpts,       |
| 45 |                              |                     | photographs) to substantiate analytic findings           |
| 46 |                              |                     |                                                          |
| 47 |                              |                     |                                                          |
| 48 | <b>Discussion</b>            |                     |                                                          |
| 49 |                              |                     |                                                          |
| 50 | Intergration with prior      | <a href="#">#18</a> | Short summary of main findings; explanation of how       |
| 51 | work, implications,          |                     | findings and conclusions connect to, support,            |
| 52 | transferability and          |                     | elaborate on, or challenge conclusions of earlier        |
| 53 | contribution(s) to the field |                     | scholarship; discussion of scope of application /        |
| 54 |                              |                     |                                                          |
| 55 |                              |                     |                                                          |
| 56 |                              |                     |                                                          |
| 57 |                              |                     |                                                          |
| 58 |                              |                     |                                                          |
| 59 |                              |                     |                                                          |
| 60 |                              |                     |                                                          |

1  
2  
3  
4  
5  
6  
7  
8  
9  
10  
11  
12  
13  
14  
15  
16  
17  
18  
19  
20  
21  
22  
23  
24  
25  
26  
27  
28  
29  
30  
31  
32  
33  
34  
35  
36  
37  
38  
39  
40  
41  
42  
43  
44  
45  
46  
47  
48  
49  
50  
51  
52  
53  
54  
55  
56  
57  
58  
59  
60

generalizability; identification of unique contributions(s) to scholarship in a discipline or field

Limitations [#19](#) Trustworthiness and limitations of findings 10

#### Other

Conflicts of interest [#20](#) Potential sources of influence of perceived influence on study conduct and conclusions; how these were managed 11

Funding [#21](#) Sources of funding and other support; role of funders in data collection, interpretation and reporting 11

The SRQR checklist is distributed with permission of Wolters Kluwer © 2014 by the Association of American Medical Colleges. This checklist was completed on 26. April 2019 using <https://www.goodreports.org/>, a tool made by the [EQUATOR Network](#) in collaboration with [Penelope.ai](#)

# BMJ Open

## Experiences of Nicotine Users Motivated to Quit During the COVID-19 Pandemic: A Secondary Qualitative Analysis

|                                 |                                                                                                                                                                                                                 |
|---------------------------------|-----------------------------------------------------------------------------------------------------------------------------------------------------------------------------------------------------------------|
| Journal:                        | <i>BMJ Open</i>                                                                                                                                                                                                 |
| Manuscript ID                   | bmjopen-2022-070906.R1                                                                                                                                                                                          |
| Article Type:                   | Original research                                                                                                                                                                                               |
| Date Submitted by the Author:   | 17-Apr-2023                                                                                                                                                                                                     |
| Complete List of Authors:       | Sharma, Ramona; The University of British Columbia Okanagan, School of Social Work<br>Rodberg, Danielle; The University of British Columbia Okanagan, School of Nursing<br>Struik, Laura; UBC Okanagan, Nursing |
| <b>Primary Subject Heading</b>: | Smoking and tobacco                                                                                                                                                                                             |
| Secondary Subject Heading:      | Qualitative research, Public health, Oncology, Addiction                                                                                                                                                        |
| Keywords:                       | COVID-19, ONCOLOGY, PUBLIC HEALTH, SOCIAL MEDICINE                                                                                                                                                              |
|                                 |                                                                                                                                                                                                                 |

SCHOLARONE™  
Manuscripts





I, the Submitting Author has the right to grant and does grant on behalf of all authors of the Work (as defined in the below author licence), an exclusive licence and/or a non-exclusive licence for contributions from authors who are: i) UK Crown employees; ii) where BMJ has agreed a CC-BY licence shall apply, and/or iii) in accordance with the terms applicable for US Federal Government officers or employees acting as part of their official duties; on a worldwide, perpetual, irrevocable, royalty-free basis to BMJ Publishing Group Ltd ("BMJ") its licensees and where the relevant Journal is co-owned by BMJ to the co-owners of the Journal, to publish the Work in this journal and any other BMJ products and to exploit all rights, as set out in our [licence](#).

The Submitting Author accepts and understands that any supply made under these terms is made by BMJ to the Submitting Author unless you are acting as an employee on behalf of your employer or a postgraduate student of an affiliated institution which is paying any applicable article publishing charge ("APC") for Open Access articles. Where the Submitting Author wishes to make the Work available on an Open Access basis (and intends to pay the relevant APC), the terms of reuse of such Open Access shall be governed by a Creative Commons licence – details of these licences and which [Creative Commons](#) licence will apply to this Work are set out in our licence referred to above.

Other than as permitted in any relevant BMJ Author's Self Archiving Policies, I confirm this Work has not been accepted for publication elsewhere, is not being considered for publication elsewhere and does not duplicate material already published. I confirm all authors consent to publication of this Work and authorise the granting of this licence.

## EXPERIENCES OF NICOTINE USERS DURING COVID-19

**EXPERIENCES OF NICOTINE USERS MOTIVATED TO QUIT DURING THE COVID-19 PANDEMIC: A  
SECONDARY QUALITATIVE ANALYSIS****AUTHORS**

- Corresponding Author: Ramona H. Sharma, BSc, MSW Student - School of Social Work, The University of British Columbia (Okanagan Campus), Kelowna, Canada
  - Postal address: Faculty of Health and Social Development, 1147 Research Road, University of British Columbia Okanagan, Kelowna, BC Canada, V1V 1V7
  - Email: [ramona.sharma@ubc.ca](mailto:ramona.sharma@ubc.ca)
- Danielle Rodberg, BSN Student - School of Nursing, The University of British Columbia (Okanagan Campus), Kelowna, Canada
- Laura L. Struik, PhD, Assistant Professor - School of Nursing, The University of British Columbia (Okanagan Campus), Kelowna, Canada

**WORD COUNT**

6026 words

**KEYWORDS**

Nicotine, Smoking, Electronic Nicotine Delivery Systems, COVID-19

## ABSTRACT

**Objectives:** The COVID-19 pandemic has brought to light a variety of key factors that affect tobacco use, including behavioral patterns, social support and connection, and physical and mental health. What we do not know is how those motivated to quit were impacted by the pandemic. As such, understanding the unique experiences and needs of people motivated to quit smoking or vaping during the COVID-19 pandemic is critical. The aim of this study was to examine the cessation experiences of nicotine users during the COVID-19 pandemic. **Design:** We conducted a supplementary secondary analysis of primary qualitative data, i.e., semi-structured interviews with individuals engaged in cigarette use (smoking), e-cigarette use (vaping), and dual use. **Setting:** British Columbia, Canada. **Participants:** Relevant data were drawn from 33 participants out of the primary study's 80-participant sample pool. **Measures:** Interview questions explored barriers and facilitators to quitting nicotine use. We then used an auto-driven qualitative secondary analysis approach to identify relevant and additional emergent themes and subthemes surrounding pandemic-specific barriers and facilitators to quitting, and unique needs for cessation support in the context of the COVID-19 pandemic. **Results:** Pandemic-specific barriers included lifestyle limitations and poor mental health due to isolation. Facilitators to quitting during the pandemic included reduced access and opportunities to use nicotine products, as well as time for personal reflection on nicotine use behaviors. Suggestions for cessation programming included a primary focus on enhancing social support features (e.g., discussion forums, support groups), followed by increasing awareness of the benefits of quitting, and enhancing visibility of resources available to support quitting. **Conclusions:** The findings provide directions for how cessation supports can be tailored to better meet the needs of users motivated to quit during and beyond the COVID-19 pandemic.

## STRENGTHS AND LIMITATIONS OF THIS STUDY

- Our qualitative approach provides detailed data on the unique needs of nicotine users hoping to quit in both pandemic and post-pandemic contexts.
- We recruited a diverse array of participants, including smokers, vapers, and dual users.
- The larger study that the present data is derived from was not designed to investigate pandemic-specific factors influencing quitting, which may impact generalizability.

## INTRODUCTION

Globally, nicotine addiction continues to remain one of the most significant public health threats [1]. However, many nicotine users of all ages report a desire to quit [2]. Environmental and psychosocial factors play a key role in shaping cessation and reduction trajectories, including the availability of appropriate and accessible supports, diversity and accessibility of available nicotine products, federal and regional policies, historical contexts such as ongoing economic, public health, and socio-political events, and individual characteristics such as mental health, income, education, and social support [3]. One example of a significant and multifaceted environmental factor that has influenced tobacco use behaviors is the recent COVID-19 pandemic.

Tobacco use patterns and cessation trajectories appear to have shifted in various directions because of the pandemic with some users reporting an increase in usage and others reporting a decrease in usage. The variability of these reports aligns with changes seen in Canadian vaping rates. According to the Canadian Tobacco and Nicotine Survey (CTNS), youth between the ages of 15 to 19 demonstrated a decrease in vaping with 15% of youth vaping in the past 30 days in 2019 compared to 13% in 2021 [4-5]. However, other age ranges showed an increase in vaping with an increase from 15% to 17% among adults ages 20 to 24 and an increase of 3% to 4% among adults aged 25 and older [4-5]. This increase in use is disproportionate among certain groups, and researchers have brought forward how the pandemic has interacted with and subsequently enhanced pre-pandemic tobacco-related health risks among disadvantaged groups [6].

Mental health appears to play a major role in increased use of tobacco products during the pandemic. In Canada, individuals who reported having fair or poor mental health in 2020 were more likely to have increased their use of nicotine products [7]. Among Canadians who vaped in the past 30 days in 2021, 18% reported that their main reason for vaping was to reduce stress and anxiety [8]. Stress reduction was more commonly reported as the main reason for vaping by youth aged 15 to 19 in 2020 (33%) compared to 2019 (21%) [8]. Similarly, many cigarette users have discussed experiencing a sense of relief from smoking with individuals smoking more to cope with the stress of the pandemic and experience a sense of calm [9].

In contrast, for some nicotine users, the pandemic was accompanied by a decrease in nicotine use and an increase in motivation to quit. From an international lens, global trends show smoking rates have been trending downwards since the onset of the pandemic. In the United States, use of a tobacco product within the past 30 days decreased significantly from 2019 to 2021 among both high school and middle school students from 31% to 13% and 12% to 4%, respectively [10-11]. As well, e-cigarette usage rates among middle to high school students showed momentous decline from 27% to 11% [10-11]. Data from the Netherlands shows smoking cessation motivations were associated with concern regarding heightened risk for developing severe illness and needing to quit to reduce complaints from others in the household during isolation [12]. However, national data from the Netherlands shows minimal declines in smoking across the timeline of the pandemic with adult smoking rates declining from 22% in 2019 to 21% in 2021 [13-14]. Other countries showed more significant reductions, with smoking experiencing a decline in New Zealand from 14% (2019) to 11% (2021), a more significant change than those reported in years prior, and Scotland even more so from 17% (2019) to 11% (2021) [15-17]. Similarly, in the same time period, e-cigarette usage in Scotland declined, with rates shrinking from 7%

1  
2  
3 to 5%, after remaining at 7% since 2015 [16-17]; by contrast, e-cigarette use in New Zealand increased  
4 from 4% to 6% throughout the pandemic [15]. In sum, worldwide, the rates of pandemic nicotine use  
5 demonstrate significant variability.  
6

7 In addition, the COVID-19 pandemic has facilitated the emergence of alternative health care  
8 modalities; more people are turning to website, SMS, and/or telephone-based healthcare modalities,  
9 including resources for cessation support [12]. Simultaneously, the COVID-19 pandemic led to a  
10 reduction in existing cessation supports due to closures and staffing, infrastructure, and resource  
11 shortages [18]. These rapid changes to available cessation resources and programming likely affected  
12 the trajectory of those trying to quit. Understanding how cessation was impacted and how individuals'  
13 cessation needs shifted is critical to informing the development of more responsive and adaptive  
14 cessation resources that consider the unique influence of the pandemic [19]. As a result, the aim of this  
15 study is to explore the cessation experiences of nicotine users motivated to quit during the COVID-19  
16 pandemic.  
17  
18  
19  
20

## 21 **METHODS**

### 22 **Design**

23 We conducted a supplementary secondary analysis of primary qualitative data in order to  
24 examine participant perspectives and experiences uniquely related to quitting during the COVID-19  
25 pandemic [20]. Our method was auto-driven and data-driven in the sense that COVID-19 was not a topic  
26 specifically addressed by our interview guides, but was rather raised by the informants (auto-driven) as  
27 discovered after primary data analysis (data-driven). In other words, upon completion of primary data  
28 analysis, we noticed a theme of several participants describing novel and unexpected nicotine-related  
29 experiences that happened solely due to the pandemic. To explore this in depth and provide voice to the  
30 sub-set of participants who discussed COVID-specific experiences, we conducted a post-hoc  
31 retrospective interpretation of previously coded data through keyword searching [20]. In addition to  
32 identifying general themes as discussed by participants, we sought to understand COVID-19-specific  
33 barriers and facilitators to quitting nicotine, which builds on the following questions asked in the  
34 primary research study: (1) "What might be some barriers to quitting?"; (2) "What are other aspects of  
35 your life that help facilitate reducing/quitting?"  
36  
37  
38  
39  
40

41 Ethical approval was received from the Behavioral Research Ethics Board at the University of  
42 British Columbia's Okanagan campus (#H21-00145). The design and analyses within this study were not  
43 pre-registered on a publicly available platform; as such, the results should be considered exploratory.  
44 The Standards for Reporting Qualitative Research (SRQR) reporting guidelines were used for quality  
45 appraisal [16]. Reflexivity was maintained by the research team throughout data analysis and  
46 manuscript writing by recording, discussing, and challenging established assumptions at all data  
47 collection and analysis stages.  
48  
49  
50

### 51 **Primary Study**

52 In the primary study, we conducted semi-structured interviews with 80 participants across  
53 British Columbia (BC), Canada between May to August 2021; these lasted between 30-60 minutes in  
54 duration. The purpose of this study was to understand the cessation needs of BC residents to inform  
55  
56  
57  
58  
59  
60

1  
2  
3 improvements for online cessation programming (see online supplementary file 1 for the interview  
4 guide, which includes details of other question topics, such as motivations behind participants' nicotine  
5 use and cessation patterns and needs with respect to a free, provincially funded online cessation  
6 support, QuitNow).  
7

8 Eligible participants were recruited through targeted Facebook and Instagram ads via a third  
9 party (PH1 Research). Participants met the following eligibility criteria: motivated to quit vaping or  
10 smoking, ages 16 and over, able to communicate in English, and able to provide informed consent. To  
11 provide informed consent, individuals who demonstrated interest were emailed an information sheet  
12 describing study purposes and procedures, potential benefits/risks of participating, confidentiality,  
13 remuneration and funding sources, researcher contact information, and consent (i.e., how to provide it,  
14 and what consenting meant). They were then able to provide informed consent (i.e., their  
15 understanding of the nature of the study, their consent to participate, and their consent to having their  
16 interview audio-recorded) via two options: (1) in writing by e-mail at their convenience, or (2) verbally at  
17 the beginning of their audio-recorded interview with a research team member (scheduled based on  
18 their preferred availability).  
19  
20  
21

22 Participants completed a demographic survey and an audio-recorded UBC Zoom interview, after  
23 which they received a \$50 online gift card to thank them for their time and input. These interviews were  
24 transcribed and analyzed by the research team using NVivo qualitative data analysis software.  
25 Participant interviews were undertaken by four researchers (author RS and further individuals named in  
26 Acknowledgements) of various disciplines (social work, nursing, kinesiology) who received identical  
27 training and utilized a pre-established interview guide to minimize individual differences in interview  
28 outcomes as a result of interviewer characteristics. Conscious efforts were made to seek elaboration  
29 and clarification from participants and not to accept potentially common assumptions at face value. No  
30 authors were known to any participants of this research prior to undertaking the study.  
31  
32  
33  
34

### 35 **Data Collection**

36 Two researchers (authors RS and DR) collected data on participant experiences surrounding  
37 COVID-19 and its influence on participant nicotine use and cessation needs. In each NVivo demographic  
38 file (n=80) from the primary study, keywords such as "COVID-19", "pandemic", "COVID", "lockdown",  
39 "isolation", "home", "stay AND home", "public AND health AND order", "health AND order", "virtual",  
40 "remote", "online", "Zoom", "work AND home", "not AND working", "working AND less" were searched.  
41  
42

43 As only a subset of participants discussed COVID-19-related topics and as the pre-coded NVivo  
44 files were organized in relation to the interview questions asked in the primary study, this approach on  
45 the basis of keyword searching was utilized to (1) rapidly identify the participants that discussed COVID,  
46 and (2) identify COVID-specific themes *within* the responses provided to the abovementioned interview  
47 questions (i.e., within barriers and facilitators to quitting). The specific keywords used were identified by  
48 the authors RS and DR in a collaborative brainstorming session as terms commonly used by the general  
49 population (as well as by participants as recalled from primary interviews) when discussing pandemic-  
50 related events in conversation, in current events and news, and on social media. As participant accounts  
51 emerged while searching, more keywords were identified as discovered.  
52  
53

54 Once all participants that discussed COVID-specific topics were identified via keyword searching,  
55 their full interview transcripts were reviewed as well to ensure any details from their unique experiences  
56  
57  
58

were not missed. In total, 33 participants discussed the impact of COVID-19 on their cessation experiences. All these responses were collected and compiled in a Word document.

### Data Analysis

Upon compilation of participant responses, two collaborative coding sessions were held and, via inductive content analysis [20], a codebook was created and applied to all relevant responses to identify common patterns among participant cessation experiences and needs during the pandemic. We then charted all themes and subthemes onto Excel software to allow for visualization and comparison of major findings. Finally, we disaggregated all identified themes and subthemes by gender, nicotine user type, and age, and Indigeneity, and did not find significant differences in theme endorsement between the stated groups; however, within subthemes, we made note of unique nuances in responses provided by Indigenous participants due to the unique factors affecting Indigenous peoples in Canada in relation to tobacco and nicotine use as a result of the ongoing and residual intergenerational impacts of colonization [21].

### Patient and Public Involvement

Participants were not involved in any aspect of the study design, recruitment, or conduct of neither the primary nor the present study. Upon recruitment for the primary study, participants were asked if they would like to receive the research findings via email upon completion of the study; findings will be disseminated through a written summary to participants who opted in. Academic outputs will be disseminated through social media and community networks.

## RESULTS

### Sample

Participants included in this study (N=33) were primarily male (55%), and of various racial and ethnic backgrounds, with White (European) heritage being the most frequently cited (33%), followed by Indigenous (27%), defined as an Aboriginal person of Canada (First Nations, Métis, and Inuit). Most of the sample was between 16 and 29 years old (57%), with the remaining 43% aged 30 and older. Finally, most participants were dual users of both combustible cigarettes and e-cigarettes (40%), followed by only smokers (33%), and only vapers (27%). A complete breakdown of participant characteristics is provided below in Table 1.

Table 1. Participant characteristics

| Demographic    |                | n (%)   |
|----------------|----------------|---------|
| Gender         | Female         | 15 (45) |
|                | Male           | 18 (55) |
| Race/Ethnicity | White          | 11 (33) |
|                | Indigenous     | 9 (27)  |
|                | Asian          | 4 (12)  |
|                | South Asian    | 2 (6)   |
|                | Latin American | 1 (3)   |

|              |                              |         |
|--------------|------------------------------|---------|
|              | Black                        | 1 (3)   |
|              | Biracial/Multiracial         | 2 (6)   |
|              | Other/Not Listed             | 3 (9)   |
| Age          | 16-18                        | 6 (18)  |
|              | 19-24                        | 7 (21)  |
|              | 25-29                        | 6 (18)  |
|              | 30+                          | 14 (43) |
| Nicotine Use | Smokers (Cigarettes-Only)    | 11 (33) |
|              | Vapers (Vapor Products-Only) | 9 (27)  |
|              | Dual Users                   | 13 (40) |

\*Expressed as a percentage of the total sample (N=33).

## Themes

From participant reports, we found several themes that fit within the following three thematic categories: (1) barriers to quitting nicotine use during the pandemic; (2) facilitators to quitting or reducing nicotine use during the pandemic; and (3) suggestions for improving cessation programming during the pandemic. The breakdown of these themes, as well as associated frequencies of endorsement ('n' being the number of participants endorsing the category/theme/subtheme) and percentages (as a proportion of the total sample for categories and themes, and of the respective category for subthemes), are outlined in Table 2.

Table 2. Themes and subthemes discussed by participants and associated frequencies (n) and percentages (%) of participants endorsing these

| Categories<br>(n, %*)                                                                  | Themes<br>(n, %*)                                                                                                                                                                                                                                  | Subthemes<br>(n, %**)                                                                                                                                                                                                                                                                                                                                                                                                                                                                                                                                                                                                                                                                                |
|----------------------------------------------------------------------------------------|----------------------------------------------------------------------------------------------------------------------------------------------------------------------------------------------------------------------------------------------------|------------------------------------------------------------------------------------------------------------------------------------------------------------------------------------------------------------------------------------------------------------------------------------------------------------------------------------------------------------------------------------------------------------------------------------------------------------------------------------------------------------------------------------------------------------------------------------------------------------------------------------------------------------------------------------------------------|
| <b>Barriers to quitting/reducing nicotine use during the pandemic</b><br><br>(21, 64%) | <b>Isolation, uncertainty, and shifts in environment and lifestyle</b> (due to fewer activities, increased boredom, diminished socializing, altered home social environment, loss of existing coping strategies/activities, etc.)<br><br>(16, 48%) | Smoking/vaping <u>more</u> to: <ul style="list-style-type: none"> <li>• Curb boredom (6, 29%)</li> <li>• Cope with triggers (3, 14%)</li> <li>• Be able to go outside (2, 10%)</li> <li>• Get away from screens ("Zoom fatigue") (2, 29%)</li> <li>• Satisfy the need to use hands when engaging in repetitive activities (TV; homework) (1, 5%)</li> </ul> Smoking/vaping <u>more</u> due to: <ul style="list-style-type: none"> <li>• Not knowing if/where one could go outside the home (2, 10%)</li> <li>• Being away from workplaces that restricted use (2, 10%)</li> <li>• Being indoors with other users (2, 10%)</li> <li>• Not being able to spend time with non-users (2, 10%)</li> </ul> |
|                                                                                        | <b>Increased stress and worsened mental health</b> (due to lack of support, reduced access to social and professional supports, etc.)                                                                                                              | Smoking/vaping <u>more</u> to: <ul style="list-style-type: none"> <li>• Cope with general stress and anxiety (5, 24%)</li> <li>• Cope with work-related stress and anxiety (3, 14%) <ul style="list-style-type: none"> <li>○ Due to working from home (blurring of boundaries between work/home) (2, 10%)</li> <li>○ Due to working in-person (fear of getting sick; less time off; burnout) (1, 5%)</li> </ul> </li> </ul>                                                                                                                                                                                                                                                                          |



|                                                                                             |                                                                                                                                                            |                                                                                                                                                                                                                                                                                                                                                                                                                                                   |
|---------------------------------------------------------------------------------------------|------------------------------------------------------------------------------------------------------------------------------------------------------------|---------------------------------------------------------------------------------------------------------------------------------------------------------------------------------------------------------------------------------------------------------------------------------------------------------------------------------------------------------------------------------------------------------------------------------------------------|
|                                                                                             | (8, 24%)                                                                                                                                                   | Smoking/vaping <u>more</u> due to: <ul style="list-style-type: none"> <li>Lack of COVID-specific mental health supports (3, 14%)</li> <li>Lack of incorporation of general and COVID-specific trauma (e.g., deaths of loved ones) and associated vulnerabilities of certain populations in supports (1, 5%)</li> </ul>                                                                                                                            |
| <b>Facilitators to quitting/reducing nicotine use during the pandemic</b><br><br>(11, 33%)  | <b>Reduced access to nicotine products and opportunities for usage</b><br>(due to fewer/restricted social events, business closures, etc.)<br><br>(6, 18%) | Smoking/vaping <u>less</u> due to: <ul style="list-style-type: none"> <li>Less opportunities to be around users (3, 27%)</li> <li>Less social pressure (3, 27%)</li> <li>Inability to purchase smoke/vape products (e.g., underage vapers) (1, 9%)</li> </ul>                                                                                                                                                                                     |
|                                                                                             | <b>Increased introspection and reflection on own behaviours</b> (due to increased time alone)<br><br>(5, 15%)                                              | Smoking/vaping <u>less</u> to: <ul style="list-style-type: none"> <li>Improve own lung health (2, 18%)</li> <li>Save money (to travel, see loved ones) (2, 18%)</li> </ul> Smoking/vaping <u>less</u> due to: <ul style="list-style-type: none"> <li>Seeing others quit during the pandemic (2, 18%)</li> <li>Fear of contracting COVID (1, 27%)</li> <li>Identifying new cognitive strategies to cope with negative emotions (1, 27%)</li> </ul> |
| <b>Suggestions for improving cessation programming during the pandemic</b><br><br>(19, 58%) | <b>Enhance social support features</b> (virtual and in-person)<br><br>(11, 33%)                                                                            | Virtual supports: <ul style="list-style-type: none"> <li>Zoom meetings (3, 16%)</li> <li>Discussion forums (3, 16%)</li> <li>Group chats (2, 11%)</li> </ul> In-person supports: <ul style="list-style-type: none"> <li>Small support groups (2, 11%)</li> <li>Plans for in-person activities when restrictions ease (2, 11%)</li> </ul>                                                                                                          |
|                                                                                             | <b>Increase awareness of quitting benefits during the pandemic</b><br><br>(7, 21%)                                                                         | Health benefits: <ul style="list-style-type: none"> <li>Discuss health implications of smoking/vaping and quitting (4, 21%)</li> </ul> Financial benefits: <ul style="list-style-type: none"> <li>Discuss financial implications of smoking/vaping during pandemic layoffs (3, 16%)</li> <li>Provide financial incentives (monetary rewards) (1, 5%)</li> </ul>                                                                                   |
|                                                                                             | <b>Provide pandemic-specific resources and advice for trying to quit during the pandemic</b><br><br>(5, 15%)                                               | Target visible locations for dissemination: <ul style="list-style-type: none"> <li>Social media (4, 15%)</li> <li>In-person locations where people are able to go (grocery stores, health facilities) (2, 11%)</li> </ul> Include culturally relevant practices for Indigenous nicotine users, e.g.: <ul style="list-style-type: none"> <li>Sweat lodges (1, 5%)</li> </ul>                                                                       |

\*Expressed as a percentage of the total sample (N=33).

\*\*Expressed as a percentage of the respective category (n indicated in first column).

#### Barriers to quitting nicotine use during the pandemic

1  
2  
3 Numerous participants (64%) reported experiencing barriers to quitting nicotine use during the  
4 pandemic, particularly in relation to pandemic-specific isolation. Approximately half (48%) of all  
5 participants said the lifestyle limitations they experienced due to the pandemic were a barrier for them.  
6 Many participants described how isolation measures resulted in a reduction in activities individuals  
7 could attend, limitations on socializing, and subsequently, an increase in boredom:  
8  
9

10  
11 'Last year for me personally, my partner and I planned on quitting and then COVID happened,  
12 and we didn't have anything to keep ourselves entertained so that's how we just fell back into  
13 the pit' (Participant 84, Indigenous female).  
14  
15

16 In this vein, individuals saw smoking and vaping as an activity to pass the time while being confined to  
17 their home environment, despite many not wanting to smoke or vape. In relation to boredom, one  
18 participant also described vaping to satiate the desire to do something with their hands while engaging  
19 in monotonous activities that became everyday activities during the pandemic, such as watching TV:  
20  
21

22  
23 'Since COVID, [vaping] is just something to do especially if I'm like doing homework all day or  
24 watching something all day every day and want to do something with my hands' (Participant 94,  
25 Indigenous female).  
26  
27

28 In addition, participants highlighted pandemic-specific isolation as a barrier to being able to  
29 engage in the alternate activities and distractions they usually use to cope with nicotine-specific triggers  
30 and cravings. Participants also noted how isolation combined with uncertainty on what they were able  
31 to do outside the home in the context of provincial stay-home orders and recommendations created a  
32 unique situation which further magnified isolation as a barrier:  
33  
34

35  
36 'Instead of smoking, we'd be going on a hike, or for a walk... That being said, I don't necessarily  
37 know the rules because of this pandemic and what's allowed' (Participant 32, male).  
38

39 A couple of participants even reported that nicotine usage provided them with a reason to go outside  
40 during the pandemic when they were otherwise advised to remain indoors:  
41  
42

43  
44 'While being stuck at home with the pandemic it was kind of nice to just have a break to get  
45 outside. I think for a while there, I wanted to smoke because I was spending all day, every day  
46 inside my house on Zoom, so smoke breaks were a way to get outside' (Participant 59, male).  
47

48 Interestingly, a few more participants specifically described wanting to leave the house to engage in  
49 nicotine use after encountering unavoidable "Zoom-fatigue", or other computer-related fatigue due to  
50 elevated screen time as a result of the sudden transfer of school and work settings to virtual platforms:  
51  
52

53  
54 'I think the hardest part is being busy all day long with Zoom fatigue or being on the computer  
55 all day during a pandemic. This is my primary source of employment and I'm finding that I just  
56  
57  
58  
59  
60

1  
2  
3 want to walk away from the computer sometimes, so I end up [leaving the house to smoke]’  
4 (Participant 34, male).  
5  
6

7 Similarly, a few participants described being home instead of at work all day proved problematic  
8 for them, as their work settings provided protective factors for reducing use through regulations or  
9 other environmental factors:  
10

11  
12 ‘If I had to go to work and be at work all day, I wouldn't smoke all day at work because according  
13 to my work I can't smoke. It's terrible right now during this pandemic where I'm home and I can  
14 [smoke all day]’ (Participant 62, male).  
15  
16

17 Furthermore, some participants reported that being confined to their home environment created an  
18 inconducive environment for cessation, due to a lack of in-person support from family members, like  
19 being trapped in an environment with smokers:  
20

21  
22 ‘I never smoked before COVID, but with COVID you're hanging out with the same people in the  
23 same bubble so you're doing what everyone is doing together. I think once COVID restrictions  
24 ease up it might make it easier [to not smoke] and then you can go outside of your bubble and  
25 hang out with people who don't, like all my other friends don't’ (Participant 29, female).  
26  
27  
28

29 Another prominent barrier to quitting was an elevated level of stress during the pandemic and  
30 associated with this, poor mental health. While some participants just spoke of general stress due to the  
31 pandemic, several participants identified employment and school as specific stressors during the  
32 pandemic – both as a result of having to work at home or long hours outside the home. According to  
33 nearly a quarter (24%) of participants, nicotine use helped them cope with this stress:  
34  
35

36  
37 ‘I'm working from home because of COVID. When I feel under a lot of pressure, I reach towards  
38 cigarettes...’ (Participant 76, Indigenous male).  
39

40  
41 ‘COVID just added so much stress. I work in a produce warehouse, so I never really got time off.  
42 I've worked through this whole pandemic, and I never got one day off, and it wears on you. Plus,  
43 what if I get sick, I don't wanna think of that, so I [smoke]’ (Participant 73, Indigenous male).  
44  
45

46 In addition, a few participants spoke of a lack of pandemic-specific mental health supports in the  
47 context of provincial stay-at-home regulations and ongoing COVID-related stress and trauma, which  
48 exacerbated existing barriers, created further barriers for coping with mental health, and led them to  
49 smoke and vape instead:  
50

51  
52 ‘[The government] put [restrictions] down during COVID and put everyone under more stress  
53 with no mental health supports... I have a job, I have a nice house and I still can't get therapy...  
54 but I can [smoke]’ (Participant 46, female).  
55  
56  
57  
58  
59  
60

1  
2  
3 'I've used the tools that [online provincial cessation supports] have to get away from smoking...  
4 But for some people or some populations, it really doesn't help sometimes. Like I work a very  
5 stressful job, and my life is very stressful, more than the average person. I've had four deaths in  
6 the last year. They talk about stress, but [don't] exactly target the added stress of calling family  
7 in and telling them people died. It just makes it hard' (Participant 76, Indigenous male).  
8  
9

#### 10 Facilitators to quitting or reducing nicotine use during the pandemic

11 A third (33%) of participants reported encountering facilitators for quitting nicotine use during  
12 the pandemic. A major theme reported by 18% was that the pandemic reduced accessibility and  
13 opportunities to smoke/vape. A few individuals reported this was because they were unable to attend  
14 social gatherings (e.g., parties) that were often associated with peer pressure to smoke/vape:  
15  
16

17  
18 '... if you smoke or vape in a more social setting, that all goes out the window with the  
19 Coronavirus...' (Participant 13, male).  
20  
21

22 In addition, a few individuals discussed how reduced access to nicotine-related products due to store  
23 closures, lockdowns, and isolation measures made it easier for them to reduce their nicotine usage:  
24  
25

26 'My vape broke at the beginning of the pandemic when all the stores were closed and nobody  
27 was going anywhere. I wasn't able to fix it, and I couldn't exactly ask my parents to go buy me a  
28 new vape, so I ended up pretty much quitting around then which was not fun but in hindsight  
29 was a stroke of luck' (Participant 31, male).  
30  
31

32  
33 'I do have one friend that quit, and he was somebody that said I'll never quit, it's not a problem,  
34 I'll do it my whole life . . . When COVID happened, and he couldn't go to any stores, he realized  
35 how horrible he felt because of it. And just from that one second and being like, okay, my lungs  
36 hurt less, it drove him to quit, which was motivating for me' (Participant 20, female).  
37  
38

39 As such, another facilitator commonly reported (15%) by participants was that the pandemic  
40 prompted individuals to become more introspective on their smoking/vaping behaviours, as well as on  
41 their behaviours that indirectly contributed to smoking/vaping, e.g.:  
42  
43

44 'Sometimes when I'm irrational and mad that will make me smoke and I learned to rationalize a  
45 lot more during this pandemic with all the time alone and away' (Participant 47, male).  
46  
47

48 Indeed, people approached introspection with a variety of motivations. For example, as quoted above, a  
49 few participants said witnessing someone in their social circle quit during the pandemic increased their  
50 own motivation for quitting. Similarly, some stated that they wanted to quit to improve their lung health  
51 given the elevated negative respiratory impacts of COVID-19 on smokers, and others said they wanted  
52 to save money for post-pandemic activities, such as traveling and seeing their families:  
53  
54  
55  
56  
57  
58  
59  
60

1  
2  
3 'I want to travel again. But now you can't travel. I'm saving up for travelling right now and not  
4 for vaping... if I save enough money, I might actually be able to see my family... I can actually go  
5 home after this silly pandemic is over' (Participant 73, Indigenous male).  
6  
7

#### 8 Suggestions for improving cessation programming during the pandemic

9 Over half of participants (55%) made comments in reference to improvements they would have  
10 liked to see with online nicotine cessation supports during COVID-19. Participants had a variety of  
11 suggestions, such as identifying unique coping strategies for people who are more isolated due to  
12 COVID. The most common recommendation (33%) was to enhance social support features. The loss of  
13 social connection during the pandemic emphasized the need to ensure that social support was available  
14 to nicotine users in this context. In addition to in-person support groups, individuals advised that  
15 programming incorporate virtual support in the form of meetings via Zoom or online discussion forums  
16 to connect with others:  
17  
18  
19  
20

21 'I think organizing Zoom meetings or small group chats where you can say what you've  
22 accomplished and how you're struggling right now and then maybe create a few friends who are  
23 all trying to quit together' (Participant 37, male).  
24  
25

26 'Forums are a really positive thing as well, because it allows people to talk to each other,  
27 especially now with COVID. We're all isolated and quitting smoking, and when you're isolated it  
28 can be even harder, because we're all under stress. So, I think being able to have a connection  
29 like that through a community where people can talk to each other and feel support, even if it's  
30 online, is good' (Participant 46, female).  
31  
32  
33

34 Many participants (21%) also suggested that programming increase awareness of the benefits of  
35 quitting specifically in relation to COVID-19. Individuals believed that since COVID-19 is a respiratory  
36 disease, widely disseminating information on the risks and health impacts of COVID-19 in relation to  
37 smoking/vaping would resonate with users:  
38  
39

40 'Smoking and COVID should be more prevalent. I think I think the COVID piece is a valuable thing  
41 to the developers to think about because it's such a hot word, and there's a lot of talk about  
42 respiratory illnesses' (Participant 48, female).  
43  
44  
45

46 Participants also mentioned that, as people were more attentive to money-related matters  
47 during the times of unemployment from COVID-19 layoffs, discussing financial implications of  
48 smoking/vaping and providing monetary incentives and rewards to quitting might provide an additional  
49 motivation to quit during the pandemic:  
50  
51

52 'I guarantee if people are scrolling through this, and they see the average smoker spends \$3,000  
53 a year on cigarettes, especially during COVID when people are losing their jobs, that would be a  
54 pretty big selling point' (Participant 64, Indigenous male).  
55  
56  
57  
58  
59  
60

1  
2  
3 'I love Vancouver [BC], it's the best place in the world, but it's also ridiculously expensive. Right  
4 now, for a lot of people, money is a big issue because with COVID people are out of work. That is  
5 an incentive so giving something monetary would be a reward' (Participant 39, male).  
6  
7

8 Finally, several participants (15%) also highlighted a need for increased awareness of pandemic-  
9 tailored resources and advice for those trying to quit during the pandemic. Suggestions included  
10 advertising through social media and at locations that coincided with the lifestyle of the public during  
11 the pandemic (e.g., grocery stores and health centres). Additionally, as the pandemic resulted in  
12 boredom and a loss of previously established coping strategies, participants suggested activities to  
13 replace smoking/vaping and help people fill their free time and cope, including tailored and culturally  
14 relevant practices for Indigenous nicotine users:  
15  
16  
17

18 'I think maybe having a different strategy for people that are more isolated throughout COVID  
19 versus once restrictions start easing out so maybe they could recommend some other strategies  
20 and distractions, let's say as an example, going for a walk' (Participant 29, female).  
21  
22  
23

24 'I know some people who were chronic major smokers do like the sweat lodge, which helps  
25 clean you out and stuff, so having resources for First Nations people, say in Kamloops [BC],  
26 letting people know they they're going to do a smoking cleanse would be helpful. But I know  
27 with COVID its extremely difficult' (Participant 69, Indigenous female).  
28  
29

## 30 DISCUSSION

31  
32

33 The present study highlights the impacts of the COVID-19 pandemic on individual nicotine  
34 cessation journeys. In addition, it establishes the importance of cessation support remaining up-to-date  
35 and considering the new and ever-changing psychosocial and socio-environmental factors that come  
36 with a global crisis. Finally, it speaks to the significance of centering participant voices and learning  
37 firsthand from nicotine users about their unique needs as it relates to barriers and facilitators to  
38 successfully quitting nicotine use.  
39  
40

41 The pandemic revealed unique vulnerabilities of nicotine users that were not previously  
42 emphasized, such as the effects of boredom, stress, and isolation. Isolation was a noteworthy barrier to  
43 quitting tobacco use according to this study. It is important to situate the concept of isolation within the  
44 macro-level socioenvironmental determinants that led to isolation for this sample. At the time of data  
45 collection, the Province of British Columbia had authorized a number of COVID-specific protective  
46 measures such as restricting capacities at gatherings, businesses, and private events, including partial or  
47 complete closures; suspending interprovincial travel (in addition to federal international travel bans);  
48 introducing vaccines in age- and vulnerability-based phases (e.g., elderly and Indigenous populations  
49 first); and enacting specific restrictions for the partial- and non-vaccinated [22]. Measures were variable  
50 to sudden changes in accordance with the evolving nature of the pandemic [22]. As such, many  
51 participants talked about how isolation as a result of the above led to immense boredom. Boredom has  
52 been found to play a key role in increased alcohol and cannabis consumption during the pandemic [23],  
53 and our findings reveal that this similarly applies to use of tobacco products. The inability to engage in  
54  
55  
56  
57  
58  
59  
60

1  
2  
3 routine activities (e.g., outdoor activities, regular exercise routines), as well as novel activities (e.g.,  
4 travel), that often served to distract them from using nicotine resulted in many participants turning to  
5 nicotine to help them pass the time. This finding is in line with other research identifying how nicotine  
6 use tends to increase when routines are disrupted, and boredom is resultantly increased [24-25].  
7

8 In addition, the pandemic context is unique due to the addition of uncertainty to isolation. Some  
9 participants discussed not even knowing where they could go if they were to leave their house due to  
10 the nature of restrictions. Combining this with the global atmosphere of not knowing if and when the  
11 pandemic will end, this finding speaks to how nicotine users may have felt a loss of control over their  
12 lives, and as such over their abilities to maintain quit status, begin their quit journeys, and/or prevent  
13 relapse. As such, the ongoing impact of isolation as well as associated feelings of diminished control over  
14 outcomes cannot be underestimated, and our study findings foreground its role on tobacco use  
15 behaviors, which is largely negative.  
16

17 It is also interesting that individuals spoke about continuing to smoke in order to go outside,  
18 versus going outside in order to smoke, as well as mentioned several unique motivators for doing so,  
19 such as encountering “Zoom-fatigue” as a result of educational and employment settings being shifted  
20 to remote formats. The pandemic appeared to create a shift in focus (being outside or getting away  
21 from screens rather than satisfying a craving) in relation to smoking. Having to go outside for a smoke  
22 has been previously perceived as a “hassle”, particularly after public smoke-free bans came into place  
23 [26]. However, going outside for a smoke during the pandemic appears to have shifted this perspective  
24 among some smokers, wherein smoking was perceived as something that enabled a needed respite  
25 from the monotony of being indoors. Public health measures would benefit from considering the nature  
26 of tobacco use when implementing stay at home orders, and particularly consider how removing the  
27 ability to leave one’s home – especially in the context of the pandemic-resultant rise in remote and  
28 hybrid work – can perpetuate health risk behaviors, like smoking. Given that distractions have been  
29 identified as a key affordance to quitting [27], ensuring that healthy distractions, for example games and  
30 opportunities for inter-user communication embedded within web- and app-based quit supports, are  
31 accessible and available during and after the pandemic is essential.  
32

33 Some individuals found pandemic isolation to make it easier to quit because there were fewer  
34 opportunities to experience social (“peer”) pressures around nicotine use; there were fewer parties and  
35 gatherings, and fewer opportunities to socialize with others who smoke/vape. On the other hand, living  
36 with other nicotine users and not being able to leave a shared environment due to lockdown measures  
37 proved a major barrier to quitting. Our findings corroborate existing studies that highlight how the  
38 opinions and behaviors of peers play a significant role in nicotine use maintenance [28]. However, as  
39 isolation and not seeing peers proved to be both a risk factor and a protective factor for increasing  
40 nicotine use, it is fundamental to note that that these findings are pertaining to exposure to social  
41 influences and contexts, and not social support. Social support is an integral element of cessation [29],  
42 and reduced connection with others due to the pandemic further highlights this. In this regard, and  
43 according to the findings, the pandemic increased the perception that enhancing social support in  
44 existing cessation supports should be prioritized, such as through forums, virtual and in-person support  
45 groups, coaching, and buddy systems, among others.  
46

47 Although participants spoke about general pandemic-related stress and anxiety and their impact  
48 on increased use, many participants also discussed stress specifically associated with working from  
49  
50  
51  
52  
53  
54  
55  
56  
57  
58  
59  
60

1  
2  
3 home, being laid off, or working in-person during the pandemic. Indeed, the pandemic introduced a  
4 myriad of sources of job-related stress, including layoffs, reduced income, reduced job security, and, for  
5 remote workers, a diminished ability to 'leave work at work' [30]. For in-person and essential workers,  
6 the pandemic led to lengthy work schedules, minimal time off, diminished time to engage in coping and  
7 stress-relieving strategies that hadn't yet been impacted by the pandemic, increased burnout, and  
8 increased susceptibility to the COVID-19 virus [31]. Previous literature has found that increased stress  
9 and anxiety about employment and finances is associated with greater nicotine consumption [32].  
10 Therefore, it makes sense why nicotine users smoked/vaped more to cope with pandemic-specific  
11 financial and employment stress and reveals how nicotine users are particularly vulnerable from a  
12 health risk perspective in the context of job loss, job instability, and burnout. Some nicotine users  
13 decided to quit or reduce use to save money in order to access protective factors such as travel  
14 (distractions), and visiting family (social support), emphasizing that the financial benefits of quitting may  
15 then be particularly relevant within a pandemic and post-pandemic context.

16  
17  
18  
19  
20 Finally, participants spoke of the traumatic stress of coping with pandemic-related deaths, and  
21 the lack of supports addressing COVID-specific traumas, which brings to light the need to incorporate  
22 both general and pandemic-related trauma into cessation supports that target mental health. It is well-  
23 established in the literature that most substance use, including nicotine use, tends to emerge as well as  
24 heighten when individuals experience trauma and feel unable to cope with it [33]. This further taps into  
25 the concept of nicotine users experiencing loss of control over life outcomes and subsequently  
26 succumbing to triggers and relapses. With almost 763 million deaths worldwide as a result of COVID-19,  
27 pandemic-related trauma continues to remain heavily significant and must be addressed by cessation  
28 supports through appropriate mental health resources, such as trauma-informed training for quit  
29 coaches, recommendations for virtual, 24/7 suicide-prevention services, and meaningful social supports  
30 [34].

31  
32  
33  
34 Specific populations, such as Indigenous peoples, are overrepresented in facing heightened  
35 adversities, including those from COVID-19 [35]. Indeed, Indigenous participants described needing to  
36 work in-person during the pandemic, wanting to but being unable to see their families, and experiencing  
37 a greater amount of COVID-related trauma than others they knew. As such, cessation supports must  
38 provide unique, culturally responsive considerations for Indigenous nicotine users, for example by  
39 incorporating support and wisdom from Elders and bands, allowing for family and community  
40 engagement, engaging in traditional and ceremonial activities such as sweat lodges, providing support in  
41 the form of Indigenous quit coaches, and, finally, engaging Indigenous voices and individuals in  
42 developing these interventions [21].

43  
44  
45  
46 In sum, the findings of this study indicate the need for interventions to incorporate elements  
47 addressing the unique susceptibilities experienced by users, such as the effects of isolation and stress, as  
48 these are states likely to persist beyond a pandemic context. Examples of these may include tools and  
49 strategies such as gamification to incorporate distractions, or tailored financial incentives. In addition,  
50 the findings emphasize the need to offer online and hybrid cessation services as well as novel modalities  
51 for information dissemination (e.g., Instagram and TikTok ads, Zoom groups, app-based cessation  
52 programs) as the literature has demonstrated that the pandemic caused significant drops in traditional,  
53 in-person cessation program enrolments [36-37]. By implementing participant suggestions, many  
54 barriers stated by individuals could potentially be eliminated or minimized. Finally, when developing  
55  
56  
57  
58  
59  
60



1  
2  
3 new programs for cessation, we must also ensure that people who face greater systemic barriers, such  
4 as Indigenous and rural populations, can access these supports [38].  
5  
6

### 7 **Strengths and Limitations**

8 This research has several limitations. First, interviews are subject to recall and social desirability  
9 biases. Second, as participants were solely from BC, Canada, participants' experiences may not be  
10 representative of experiences in a broader group of nicotine users. In addition, it must be noted that BC  
11 implemented pandemic response measures differentially from other provinces and countries, which  
12 may limit the transferability of the findings to individuals in areas where the response measures were  
13 different from that of BC. Third, since we did not directly ask questions about the COVID-19 pandemic,  
14 not all participants from the primary project provided their opinions. It is possible more participants  
15 would have provided in-depth information if intentional questions surrounding the pandemic had been  
16 incorporated into the original interviews. Fourth, due to our selection of keywords, it is possible some  
17 statements about COVID-19 and the pandemic could have been missed. Fifth, given that data were  
18 collected during a specific time period (May to August 2021), sociocultural and policy changes evolving  
19 with the pandemic may have continued to influence cessation needs beyond the scope of these findings.  
20 Finally, our sample may be unique in that participants may belong to a higher socioeconomic status than  
21 the general population of nicotine users worldwide as indicated by access to a desktop or mobile device  
22 and an Internet connection. Despite these limitations, this study has some noteworthy strengths. First,  
23 drawing secondary data from a very large primary study allowed for maximum variation across a range  
24 of sample characteristics, providing a rich dataset from which to develop themes. Next, our use of  
25 inductive qualitative methods enabled a detailed analytical approach. Finally, collecting rich interview  
26 data over months allowed us to capture nuanced, as well as consistent themes in the context of an ever-  
27 changing pandemic landscape in real time.  
28  
29  
30  
31  
32  
33  
34

### 35 **CONCLUSIONS**

36  
37  
38 This qualitative study provided a snapshot into the lived experiences, needs, and desires of  
39 nicotine users motivated to quit during the COVID-19 pandemic. While isolation from the pandemic lent  
40 to some facilitators to quitting (e.g., reduced exposure to social pressures), participants reported a  
41 broader number of barriers to quitting associated with isolation. In addition, stress, especially financial  
42 stress, associated with the pandemic played a critical role in disrupting cessation efforts. Cessation  
43 programming would benefit from considering these unique impacts of the pandemic on cessation.  
44  
45  
46

### 47 **ACKNOWLEDGEMENTS**

48 We thank all the individuals who reported their experiences quitting nicotine use. We also thank  
49 Shaheer Khan, Kyla Christianson, and Christine Yang who assisted with initial data collection and  
50 analysis.  
51  
52

### 53 **COMPETING INTERESTS STATEMENT**

54 The authors have no conflicts of interest to declare.  
55  
56  
57  
58  
59  
60

### **FUNDING STATEMENT**

This work was supported by funding from the British Columbia Ministry of Health, via a BC Lung Foundation Research Agreement (grant#: #018471) and a Canadian Cancer Society Scholar Award (Prevention) (grant#: 707156).

### **AUTHOR CONTRIBUTIONS**

RS oversaw participant recruitment, data collection, interview transcription, primary data analysis, and conceptualization of the manuscript. LS, as senior author, conceptualized and designed the greater project and research protocol, and obtained research funding. DR led conduction of secondary data analysis. RS and DR jointly developed the manuscript, with LS overseeing and providing feedback on draft versions. All authors have seen and approved the final version.

### **PATIENT CONSENT**

As the present study involved secondary analysis of primary data, participant consent was not required as they had previously consented to the primary study.

### **ETHICAL APPROVAL**

Behavioral Research Ethics Board at the University of British Columbia's Okanagan campus (#H21-00145).

### **DATA SHARING STATEMENT**

We have uploaded the semi-structured interview guide as a Supplementary File. To protect participant identities, we do not intend to share participant interview transcripts in a repository. All requests for data sharing may be directed to the authors.

## REFERENCES

1. World Health Organization. Tobacco [Internet]. Who.int. World Health Organization: WHO; 2022. Available from: <https://www.who.int/news-room/fact-sheets/detail/tobacco>
2. Centers for Disease Control and Prevention. Smoking Cessation: Fast Facts [Internet]. CDC Tobacco Free. 2020 [cited 2022 Nov 3]. Available from: [https://www.cdc.gov/tobacco/data\\_statistics/fact\\_sheets/cessation/smoking-cessation-fast-facts/index.html](https://www.cdc.gov/tobacco/data_statistics/fact_sheets/cessation/smoking-cessation-fast-facts/index.html)
3. Castro Y, Heck K, Forster JL, Widome R, Cubbin C. Social and Environmental Factors Related to Smoking Cessation among Mothers: Findings from the Geographic Research on Wellbeing (GROW) Study. *American Journal of Health Behavior* [Internet]. 2015 Nov 1 [cited 2022 Nov 3];39(6):809–22. Available from: <https://www.ncbi.nlm.nih.gov/pmc/articles/PMC4603443/>
4. Statistics Canada. Canadian Tobacco and Nicotine Survey, 2021 [Internet]. [www150.statcan.gc.ca](http://www150.statcan.gc.ca). Government of Canada; 2022 [cited 2022 Nov 3]. Available from: <https://www150.statcan.gc.ca/n1/daily-quotidien/220505/dq220505c-eng.htm>
5. Statistics Canada. Canadian Tobacco and Nicotine Survey (CTNS): summary of results for 2019 [Internet]. [www150.statcan.gc.ca](http://www150.statcan.gc.ca). Government of Canada; 2020 [cited 2023 Apr 11]. Available from: <https://www.canada.ca/en/health-canada/services/canadian-tobacco-nicotine-survey/2019-summary.html>
6. Melamed OC, Zawertailo L, Schwartz R, Buckley L, Selby P. Commentary - Protecting vulnerable groups from tobacco-related harm during and following the COVID-19 pandemic. *Health Promotion and Chronic Disease Prevention in Canada* [Internet]. 2021 Jun [cited 2022 Nov 3];41(10). Available from: <https://www.canada.ca/en/public-health/services/reports-publications/health-promotion-chronic-disease-prevention-canada-research-policy-practice/vol-41-no-10-2021/protecting-vulnerable-groups-tobacco-harm-covid-19-pandemic.html>
7. Statistics Canada. StatCan COVID-19: Data to Insights for a Better Canada [Internet]. StatCan COVID-19: Data to Insights for a Better Canada. Government of Canada; 2022 [cited 2022 Nov 2]. Available from: <https://www150.statcan.gc.ca/n1/en/catalogue/45280001>
8. Statistics Canada. Canadian Tobacco and Nicotine Survey, 2020 [Internet]. [www150.statcan.gc.ca](http://www150.statcan.gc.ca). Government of Canada; 2021 [cited 2022 Nov 3]. Available from: <https://www150.statcan.gc.ca/n1/daily-quotidien/210317/dq210317b-eng.htm>
9. Kayhan Tetik B, Gedik Tekinemre I, Taş S. The Effect of the COVID-19 Pandemic on Smoking Cessation Success. *Journal of Community Health* [Internet]. 2020 Jul 8 [cited 2021 Mar 21];46(3). Available from: <https://www.ncbi.nlm.nih.gov/pmc/articles/PMC7340767/>
10. Gentzke AS, Wang TW, Cornelius M, Park-Lee E, Ren C, Sawdey MD et al. Tobacco Product Use and Associated Factors Among Middle and High School Students — National Youth Tobacco Survey, United States, 2021. *MMWR CDC Surveill Summ* [Internet]. 2022 Mar 11 [cited 2023 Apr 11];71(5). Available from: <https://www.cdc.gov/mmwr/volumes/71/ss/pdfs/ss7105a1-H.pdf>
11. Wang TW, Gentzke AS, Creamer MR, Cullen KA, Holder-Hayes E, Sawdey MD et al. Tobacco Product Use and Associated Factors Among Middle and High School Students — United States, 2019. *MMWR CDC Surveill Summ* [Internet]. 2019 Dec 6 [cited 2023 Apr 11];68(12). Available from: [https://www.hawaiihealthmatters.org/content/sites/hawaii/NYTS\\_from\\_MMWR\\_2019.pdf](https://www.hawaiihealthmatters.org/content/sites/hawaii/NYTS_from_MMWR_2019.pdf)
12. Kopelovich SL, Monroe-DeVita M, Buck BE, Brenner C, Moser L, Jarskog LF, et al. Community Mental Health Care Delivery During the COVID-19 Pandemic: Practical Strategies for Improving Care for People with Serious Mental Illness. *Community Mental Health Journal* [Internet]. 2020 Jun 19 [cited 2022 Nov 3];57(3). Available from: <https://www.ncbi.nlm.nih.gov/pmc/articles/PMC7304659/>

13. Bommel  J, Walters BH, Willemsen M. Smoking in the Netherlands: Key Statistics for 2021. Utrecht: Trimbos-instituut; 2022 Jun. Report No.: AF1999.
14. Bommel  J, Walters BH, Willemsen M. Smoking in the Netherlands: Key Statistics for 2019. Utrecht: Trimbos-instituut; 2020 Jul. Report No.: AF1792.
15. New Zealand Ministry of Health. Annual Update of Key Results 2020/21: New Zealand Health Survey [Internet]. Ministry of Health – Manat  Hauora; 2021 Dec 1 [2022 Nov 18; cited 2023 Apr 11]. Available from: <https://www.health.govt.nz/publication/annual-update-key-results-2020-21-new-zealand-health-survey>
16. Birtwistle S, Deakin E, Whitford R, Hinchliffe S, Daniels-Creasey A, Rule S et al. The Scottish Health Survey 2021 – volume 1: main report. Scottish Government; 2022 Nov. Report No.: 9781805251514.
17. Biggs H, Christie S, Wilson V, Elliott C, Shields J, Vosnaki K et al. Scottish Health Survey 2019 – volume 1: main report. Scottish Government; 2020 Sept. Report No.: 9781800040465.
18. Bandi P, Asare S, Majmundar A, Xue Z, Han X, Westmaas JL, et al. Changes in Smoking Cessation–Related Behaviors Among US Adults During the COVID-19 Pandemic. JAMA Network Open [Internet]. 2022 Aug 1 [cited 2022 Nov 3];5(8):e2225149. Available from: <https://jamanetwork.com/journals/jamanetworkopen/fullarticle/2794810>
19. Bommele J, Hopman P, Walters BH, Geboers C, Croes E, Fong GT, et al. The double-edged relationship between COVID-19 stress and smoking: Implications for smoking cessation. Tobacco Induced Diseases [Internet]. 2020 Jul 27 [cited 2022 Nov 3];18(63). Available from: <https://www.ncbi.nlm.nih.gov/pmc/articles/PMC7386200/>
20. Heaton J. Reworking qualitative data. London; Thousand Oaks, California: Sage; 2004.
21. Struik LL, Werstuik S-T, Sundstrom A, Dow-Fleisner S, Ben-David S. Factors that influence the decision to vape among Indigenous youth. BMC Public Health. 2022;22(1). Available from: <https://bmcpublichealth.biomedcentral.com/articles/10.1186/s12889-022-13095-y>
22. Canadian Institute for Health Information. COVID-19 Intervention Timeline in Canada: Data Tables Ottawa, ON; 2021. Available from: <https://www.cihi.ca/en/canadian-covid-19-intervention-timeline>
23. Statistics Canada. Alcohol and cannabis use during the pandemic: Canadian Perspectives Survey Series 6 [Internet]. www150.statcan.gc.ca. Government of Canada; 2021 [cited 2022 Nov 3]. Available from: <https://www150.statcan.gc.ca/n1/daily-quotidien/210304/dq210304a-eng.htm>
24. Gonzalez M, Epperson AE, Halpern-Felsher B, Halliday DM, Song AV. Smokers Are More Likely to Smoke More after the COVID-19 California Lockdown Order. International Journal of Environmental Research and Public Health [Internet]. 2021 Mar 5 [cited 2022 Nov 3];18(5):2582. Available from: <https://www.ncbi.nlm.nih.gov/pmc/articles/PMC7967350/>
25. Smith B, Lim M. How the COVID-19 pandemic is focusing attention on loneliness and social isolation. Public Health Research & Practice [Internet]. 2020 [cited 2022 Nov 3];30(2). Available from: <https://pdfs.semanticscholar.org/d4b8/7055101c6b3988c43eb3a53f59b8be68e986.pdf>
26. Ritchie D, Amos A, Martin C. Public places after smoke-free—A qualitative exploration of the changes in smoking behaviour. Health & Place [Internet]. 2010 May [cited 2022 Nov 3];16(3):461–9. Available from: <https://www.sciencedirect.com/science/article/abs/pii/S1353829209001476>
27. Struik LL, Bottorff JL, Baskerville NB, Oliffe JL. The Crush the Crave Quit Smoking App and Young Adult Smokers: Qualitative Case Study of Affordances. JMIR mHealth and uHealth [Internet]. 2018 Jun 8 [cited 2022 Nov 3];6(6):e9489. Available from: <https://mhealth.jmir.org/2018/6/e134/>
28. Soulakova JN, Tang C-Y, Leonardo SA, Taliaferro LA. Motivational Benefits of Social Support and Behavioural Interventions for Smoking Cessation. Journal of Smoking Cessation [Internet]. 2018

- 1  
2  
3 Jan 21 [cited 2022 Nov 3];13(4):216–26. Available from:  
4 <https://www.ncbi.nlm.nih.gov/pmc/articles/PMC6459678/>  
5  
6 29. Murray RP, Johnston JJ, Dolce JJ, Lee WW, O’Hara P. Social support for smoking cessation and  
7 abstinence: The lung health study. *Addictive Behaviors* [Internet]. 2000 Jul 24 [cited 2023 Apr  
8 11];20(2):159-170. Available from:  
9 <https://www.sciencedirect.com/science/article/pii/S030646039980001X>  
10  
11 30. World Health Organization. COVID-19 pandemic triggers 25% increase in prevalence of anxiety  
12 and depression worldwide [Internet]. News. World Health Organization; 2022 [cited 2022 Nov  
13 3]. Available from: [https://www.who.int/news/item/02-03-2022-covid-19-pandemic-triggers-  
14 25-increase-in-prevalence-of-anxiety-and-depression-worldwide](https://www.who.int/news/item/02-03-2022-covid-19-pandemic-triggers-25-increase-in-prevalence-of-anxiety-and-depression-worldwide)  
15  
16 31. Chan XW, Shang S, Brough P, Wilkinson A, Lu C. Work, life and COVID-19: A Rapid Review and  
17 practical recommendations for the post-pandemic workplace. *Asia Pacific Journal of Human  
18 Resources*. 2022;61(2):257–76. Available from: <https://doi.org/10.1111/1744-7941.12355>  
19  
20 32. Kalkhoran SM, Levy DE, Rigotti NA. Smoking and E-Cigarette Use Among U.S. Adults During the  
21 COVID-19 Pandemic. *American Journal of Preventive Medicine* [Internet]. 2021 Oct [cited 2022  
22 Nov 3];62(3). Available from: <https://doi.org/10.1016/j.amepre.2021.08.018>  
23  
24 33. Feldner M, Babson K, Zvolensky M. Smoking, traumatic event exposure, and post-traumatic  
25 stress: A critical review of the empirical literature☆. *Clinical Psychology Review*. 2007;27(1):14–  
26 45. Available from: <https://doi.org/10.1016/j.cpr.2006.08.004>  
27  
28 34. WHO coronavirus (COVID-19) dashboard [Internet]. World Health Organization; [cited  
29 2023Apr16]. Available from: <https://covid19.who.int/>  
30  
31 35. Covid-19 and Indigenous Peoples [Internet]. United Nations. United Nations; [cited 2023Apr16].  
32 Available from: <https://www.un.org/development/desa/indigenouspeoples/covid-19.html>  
33  
34 36. Ahluwalia IB, Myers M, Cohen JE. COVID-19 pandemic: an opportunity for tobacco use cessation.  
35 *The Lancet Public Health* [Internet]. 2020 Nov 1 [cited 2022 Nov 3];5(11):e577. Available from:  
36 [https://www.thelancet.com/journals/lanpub/article/PIIS2468-2667\(20\)30236-X/fulltext](https://www.thelancet.com/journals/lanpub/article/PIIS2468-2667(20)30236-X/fulltext)  
37  
38 37. Elling J, Crutzen R, Talhout R, De Vries H. Tobacco smoking and smoking cessation in times of  
39 COVID-19. *Tobacco Prevention & Cessation* [Internet]. 2020 Jul 1 [cited 2020 Aug 2];6(July).  
40 Available from: <https://www.ncbi.nlm.nih.gov/pmc/articles/PMC7549523/>  
41  
42 38. Minian N, Veldhuizen S, Tanzini E, Duench S, deRuiter WK, Barker M, et al. Changes in the reach  
43 of a smoking cessation program in Ontario, Canada, during the COVID-19 pandemic: a cross-  
44 sectional study. *Canadian Medical Association Open Access Journal* [Internet]. 2021 Oct 1 [cited  
45 2022 Nov 3];9(4):E957–65. Available from: <https://www.cmajopen.ca/content/9/4/E957>  
46  
47  
48  
49  
50  
51  
52  
53  
54  
55  
56  
57  
58  
59  
60



## QUITNOW RESEARCH STUDY PROTOCOL

### INTERVIEW GUIDE FOR NON-INDIGENOUS CURRENT QUITNOW USERS

#### Preparation (using Zoom for interviews)

1. AV check
2. Recording ready (recording app on phone)
3. Materials for sharing uploaded (questionnaire, interview guide, consent form)
4. Facilitator notes
5. Ensure consent for all participants has been received
6. Make sure phone calls are blocked from phone

#### NOTE:

- Try your best to interview the participant as close to 1 hour as you can
  - Take your time – if you are not rushed, then participants will feel less rushed to answer your questions
  - Pause for a few seconds after participants answer – this will prompt participants to add more to their answer. Saying something like “*mhm...*” after they answer as if you are expecting them to say more.
  - Encourage participants to take their time with their responses.
- Encourage creative thinking
  - Do not limit participants with what they believe is possible. People do their best creative thinking when they do not think about practical constraints.
- Try to ask as many open-ended (vs. Closed-ended) questions as possible
  - Example of a closed-ended question: *Do you like that?*
  - Example of an open-ended question: *What do you like about that?*
- Phrases you can use to prompt participants to talk more:
  - *Tell me more about \_\_\_\_.*
  - *How can you see \_\_\_\_ being incorporated into the website?*
  - *How can you see \_\_\_\_ (flaw of the website) \_\_\_\_ being fixed?*
  - *What else?*
- Responses to difficult answers:
  - Participant: there’s nothing I don’t like about it! It’s great!
    - Answer: “*What’s so great about it?*”
    - Answer: “*What can make it better?*”
    - Answer: “*I’m glad you like it so much! We’re also interested in what you don’t like about the website, as insignificant as it may be – where do you think the website can improve?*”
    - Answer: “*On a scale of 1-10, how confident do you think this website will be in helping you quit?*” - if below 10, ask “*how could the website be changed so that your answer is 10?*”



### Welcome/Instructions for Facilitators (5 minutes)

1. Hello, thank you for taking the time
2. Introduce yourself
3. Questionnaire – thank them for completing it
  - o \*If they haven't had a chance to do it, screen share the questionnaire and complete it with them.
4. Purpose of the study: to invite BC residents to provide their input of the smoking cessation service, QuitNow.
5. Consent – ongoing process (can discontinue at any point)
6. Questions?
7. Interview is being recorded – is that okay? \*start recording\*
8. Acknowledge that this research is taking place on the unceded territory of the Syilx/Okanagan people.
9. Remind participants that we are not QuitNow employees and that they can share any type of feedback.
10. Encourage participants to open up the website while they are conducting the interview

### QuitNow Questions (~30 minutes)

*We are now going to ask you to walk through the QuitNow website and talk about what aspects of it worked well and which ones did not. So, to start...*

1. Do you/have you used QuitNow on your mobile device and/or laptop?
2. How did you hear about QuitNow?
3. How have you used QuitNow to help you quit?
4. Why did you start using QuitNow? What kept you coming back? OR Why did you not use it/stop using it?
5. What about QuitNow do you like the most?
  - a. Which aspects do you use the most?
  - b. How did (said aspects) help you in reaching your goals of reducing or quitting?
  - c. Can you tell me about a time when (said aspect) helped you?
  - d. How could this aspect be improved/even better?
6. What about QuitNow do you not like?
  - a. What were its limitations in relation to your efforts to reduce/quit?
  - b. What were you hoping for instead?
  - c. How could this limitation be addressed (e.g., should it be removed, or could it be improved)?
7. How would you like to receive support on QuitNow?
8. Would you want the QuitNow forum to have discussion threads?
  - a. If you were at week 1, would you want to hear about what others did during week 12?
  - b. Alternatively, would you like to see threads based on themes (e.g., struggles, successes, triggers, motivations, etc.)?
  - c. Or do you prefer to just have an open forum?
9. What types of information would you like to see on QuitNow (e.g., benefits of quitting, consequences of not quitting, stories from others, tips to stay nicotine-free, suggestions for distractions, what to expect, etc.)?
10. What do you think of incorporating support for quitting e-cigarettes on QuitNow?



- a. How should it be different to cigarette cessation support?
- b. How should it be similar?
11. What additional features would you like to see on QuitNow?
12. Do you have any suggestions for improving the look and feel of QuitNow?
13. Would you recommend QuitNow to your friends/family? Why or why not?
14. How could we get the word out that QuitNow exists?
15. What might be some barriers (e.g., stress, friends or family who smoke)? How could/should these be mitigated by QuitNow?
16. Outside of QuitNow, what are other aspects of your life that help facilitate reducing/quitting (e.g., social support, willpower, etc.)? How could/should these be incorporated into QuitNow?
17. For current QuitNow users: You have told me that you have [reduced/quit/no change in] smoking since you were first introduced to QuitNow. What do you think has been the biggest influencing factor? Overall, how helpful has QuitNow been to you?
18. Thinking about what we have talked about so far, if you could provide the developers of QuitNow with some advice, what would it be?
19. If you could have anything you wanted (i.e., in an ideal world), what would you want QuitNow have/do for you?
20. If we were to do a follow up study with a focus group, would you be interested in taking part in that? We will contact you if we do this.
21. Would you like to receive the results of the study once it is published?

#### **Closing: final comments (5 minutes)**

Thank you for joining me today and helping us understand more about what we can do to improve BC's largest smoking cessation service. This will help us to tailor the website so that it is better able to meet the needs of BC residents who are trying to quit smoking or vaping. We are at the end of this session but before we leave, do you have any final thoughts that you would like to share?

- Which vendor would you like to receive your \$50 honorarium for?
- Would you live to be contacted to participate in a follow-up study?
- Would you like to receive the results of the study once they are published?

#### **After the Interview**

1. Update spreadsheet (OneDrive):
  - a. Ensure participant information is updated (i.e., smoke status, vape status, QuitNow user, age, gender, consent, questionnaire, interview, honorarium, agree to follow-up contact, would like to receive the results of the study)
  - b. Record if they would like to participate in a follow up focus group
  - c. Record if they would like to receive results of the study
2. Upload to OneDrive
  - a. Recording
  - b. Questionnaire
3. \*\*Ensure files are labelled with participant ID, gender, and QuitNow status \*\*
  - a. E.g., "#23, M, Y" for participant number 23, male, QuitNow user (Y)
  - b. E.g., "#23, F, N" for participant number 23, female, QuitNow non-user





## INTERVIEW GUIDE FOR NON-INDIGENOUS POTENTIAL QUITNOW USERS

### Preparation (using Zoom for interviews)

1. AV check
2. Recording ready (recording app on phone)
3. Materials for sharing uploaded (questionnaire, interview guide, consent form)
4. Facilitator notes
5. Ensure consent for all participants has been received
6. Make sure phone calls are blocked from phone

### NOTE:

- Try your best to interview the participant as close to 1 hour as you can
  - Take your time – if you are not rushed, then participants will feel less rushed to answer your questions
  - Pause for a few seconds after participants answer – this will prompt participants to add more to their answer. Saying something like “*mhm...*” after they answer as if you are expecting them to say more.
  - Encourage participants to take their time with their responses.
- Encourage creative thinking
  - Do not limit participants with what they believe is possible. People do their best creative thinking when they do not think about practical constraints.
- Try to ask as many open-ended (vs. Closed-ended) questions as possible
  - Example of a closed-ended question: *Do you like that?*
  - Example of an open-ended question: *What do you like about that?*
- Phrases you can use to prompt participants to talk more:
  - *Tell me more about \_\_\_\_.*
  - *How can you see \_\_\_\_ being incorporated into the website?*
  - *How can you see \_\_\_\_ (flaw of the website) \_\_\_\_ being fixed?*
  - *What else?*
- Responses to difficult answers:
  - Participant: there’s nothing I don’t like about it! It’s great!
    - Answer: *“What’s so great about it?”*
    - Answer: *“What can make it better?”*
    - Answer: *“I’m glad you like it so much! We’re also interested in what you don’t like about the website, as insignificant as it may be – where do you think the website can improve?”*

Answer: *“On a scale of 1-10, how confident do you think this website will be in helping you quit?”* - if below 10, ask *“how could the website be changed so that your answer is 10?”*

### Welcome/Instructions for Facilitators (5 minutes)

1. Hello, thank you for taking the time
2. Introduce yourself
3. Questionnaire – thank them for completing it



- \*If they haven't had a chance to do it, screen share the questionnaire and complete it with them.
4. Purpose of the study: to invite BC residents to provide their input of the smoking cessation service, QuitNow.
5. Consent – ongoing process (can discontinue at any point)
6. Questions?
7. Interview is being recorded – is that okay? \*start recording\*
8. Acknowledge that this research is taking place on the unceded territory of the Syilx/Okanagan people.
9. Remind participants that we are not QuitNow employees and that they can share any type of feedback.
10. Encourage participants to open up the website while they are conducting the interview

### QuitNow Questions (~30 minutes)

*Before this interview, you were asked to take a look at the QuitNow website, so I want to now hear about your reactions to the website and what it currently offers.*

1. Let's start with the overall look and feel.
  - a. What is your initial reaction?
  - b. How could it be improved?
2. What aspects of the website did you like?
  - a. What would you find helpful in quitting smoking?
  - b. What would keep you coming back?
3. What did you not like?
  - a. What are the major limitations of the site?
  - b. What makes you not want to come back to it?
4. How would you like to receive support on QuitNow?
5. Would you want the QuitNow forum to have discussion threads?
  - a. If you were at week 1, would you want to hear about what others did during week 12?
  - b. Alternatively, would you like to see threads based on themes (e.g., struggles, successes, triggers, motivations, etc.)?
  - c. Or do you prefer to just have an open forum?
6. What types of information would you like to see on QuitNow (e.g., benefits of quitting, consequences of not quitting, stories from others, tips to stay nicotine-free, suggestions for distractions, what to expect, etc.)?
7. What do you think of incorporating support for quitting e-cigarettes on QuitNow?
  - a. How should it be different to cigarette cessation support?
  - b. How should it be similar?
8. Outside of QuitNow, what are other aspects in your life that help facilitate reducing/quitting (e.g., social support, willpower, etc.)? How could/should these be incorporated into QuitNow?
9. What additional features would you like to see on QuitNow?
10. Thinking about what we have talked about so far, if you could provide the developers of QuitNow with some advice, what would it be?
11. Would you recommend QuitNow to your friends/family? Why or why not?
12. What might be some barriers (e.g., stress, friends/family who smoke) to quitting? How could/should these be mitigated by QuitNow?



13. Would you be more likely to use QuitNow on your mobile device or laptop?
14. If you could have anything you wanted, what would you want QuitNow have/do for you?
15. How could we get the word out that QuitNow exists?
16. If we were to do a follow up study with a focus group, would you be interested in taking part in that? We will contact you if we do this.
17. Would you like to receive the results of the study once it is published?

#### **Closing: final comments (5 minutes)**

Thank you for joining me today and helping us understand more about what we can do to improve BC's largest smoking cessation service. This will help us to tailor the website so that it is better able to meet the needs of BC residents who are trying to quit smoking or vaping. We are at the end of this session but before we leave, do you have any final thoughts that you would like to share?

- Which vendor would you like to receive your \$50 honorarium for?
- Would you like to be contacted to participate in a follow-up study?
- Would you like to receive the results of the study once they are published?

#### **After the Interview**

1. Update spreadsheet (OneDrive):
  - a. Ensure participant information is updated (i.e., smoke status, vape status, QuitNow user, age, gender, consent, questionnaire, interview, honorarium, agree to follow-up, would like results of the study)
  - b. Record if they would like to participate in a follow up focus group
  - c. Record if they would like to receive results of the study
2. Upload to OneDrive
  - a. Recording
  - b. Questionnaire
3. \*\*Ensure files are labelled with participant ID, gender, and QuitNow status \*\*
  - a. E.g., "#23, M, Y" for participant number 23, male, QuitNow user (Y)
  - b. E.g., "#23, F, N" for participant number 23, female, QuitNow non-user



## INTERVIEW GUIDE FOR INDIGENOUS CURRENT QUITNOW USERS

### Preparation (using Zoom for interviews)

1. AV check
2. Recording ready (recording app on phone)
3. Materials for sharing uploaded (questionnaire, interview guide, consent form)
4. Facilitator notes
5. Ensure consent for all participants has been received
6. Make sure phone calls are blocked from phone

### Welcome/Instructions for Facilitators (5 minutes)

1. Hello, thank you for taking the time
2. Introduce yourself
3. Questionnaire – thank them for completing it; if they haven't had a chance to do it, go through it on share screen
4. Purpose of the study: to invite BC residents to provide their input of the smoking cessation service, QuitNow.
5. Questions?
6. Interview is being recorded – is that okay?
7. Acknowledge that this research is taking place on the unceded territory of the Syilx/Okanagan people.

### QuitNow Questions (~50 minutes)

*We are now going to ask you to walk through the QuitNow website and talk about what aspects of it worked well and which ones did not. So, to start...*

1. Do you/have you used QuitNow on your mobile device and/or laptop?
2. How did you hear about QuitNow?
3. How have you used QuitNow to help you quit?
4. Why did you start using QuitNow? What kept you coming back? OR Why did you not use it/stop using it?
5. We understand that you identify as Indigenous. Which nation do you belong to?
6. We understand that tobacco is considered a medicine in some Indigenous cultures. Is that the case with your nation as well?
  - a. How should this be honored in QuitNow?
7. What other aspects of your nation's culture or of Indigenous culture in general might be honored in QuitNow?
8. What about QuitNow do you like the most?
  - a. Which aspects do you use the most?
  - b. How (said aspects) help you in reaching your goals of reducing or quitting?
  - c. Can you tell me about a time when (said aspect) helped you?
  - d. How could this aspect be improved/even better?
  - e. What aspects of QuitNow resonate with your nation's culture or Indigenous culture in general as you understand it?

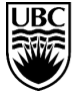

**a place of mind**  
THE UNIVERSITY OF BRITISH COLUMBIA

9. What about QuitNow do you not like?
  - a. What were its limitations in relation to your efforts to reduce/quit?
  - b. What were you hoping for instead?
  - c. How could this limitation be addressed (e.g., should it be removed, or could it be improved)?
  - d. What aspects of QuitNow do not resonate with your nation's culture or Indigenous culture in general as you understand it? How could this be addressed?
10. How would you like to receive social support on QuitNow?
11. Would you want the QuitNow forum to have discussion threads?
  - a. If you were at week 1, would you want to hear about what others did during week 12?
  - b. Alternatively, would you like to see threads based on themes (e.g., struggles, successes, triggers, motivations, etc.)?
  - c. Or do you prefer to just have an open forum?
12. What types of information would you like to see on QuitNow (e.g., benefits of quitting, consequences of not quitting, stories from others, tips to stay nicotine-free, suggestions for distractions, what to expect, etc.)?
13. What do you think of incorporating support for quitting e-cigarettes (e.g., Juul) on QuitNow?
  - a. How should it be different to cigarette cessation support?
  - b. How should it be similar?
14. What additional features would you like to see on QuitNow?
15. Do you have any suggestions for improving the look and feel of QuitNow?
16. Would you recommend QuitNow to your friends/family? Why or why not?
17. How could we get the word out that QuitNow exists?
18. Outside of QuitNow, what are other aspects in your life that help facilitate reducing/quitting (e.g., social support, willpower, etc.)? How could/should these be incorporated into QuitNow?
19. What might be some barriers (e.g., stress, friends or family who smoke)? How could/should these be mitigated by QuitNow?
20. For QuitNow users: You have told me that you have [reduced/quit/no change in] smoking since you were first introduced to QuitNow. What do you think has been the biggest influencing factor? Overall, how helpful has QuitNow been to you?
21. Thinking about what we have talked about so far, if you could provide the developers of QuitNow with some advice, what would it be?
22. If you could have anything you wanted (i.e., in an ideal world), what would you want QuitNow have/do for you?

**Closing: final comments (5 minutes)**

Thank you for joining me today and helping us understand more about what we can do to improve BC's largest smoking cessation service. This will help us to tailor the website so that it is better able to meet the needs of BC residents who are trying to quit smoking or vaping. We are at the end of this session but before we leave, do you have any final thoughts that you would like to share?

way' limlæmt,| thank you



## INTERVIEW GUIDE FOR INDIGENOUS POTENTIAL QUITNOW USERS

### Preparation (using Zoom for interviews)

1. AV check
2. Recording ready (recording app on phone)
3. Materials for sharing uploaded (questionnaire, interview guide, consent form)
4. Facilitator notes
5. Ensure consent for all participants has been received
6. Make sure phone calls are blocked from phone

### Welcome/Instructions for Facilitators (5 minutes)

1. Hello, thank you for taking the time
2. Introduce yourself
3. Questionnaire – thank them for completing it; if they haven't had a chance to do it, go through it on share screen
4. Purpose of the study: to invite BC residents to provide their input of the smoking cessation service, QuitNow.
5. Questions?
6. Confirm that they have looked through the QuitNow website
7. Interview is being recorded – is that okay?
8. Acknowledge that this research is taking place on the unceded territory of the Syilx/Okanagan people.

### QuitNow Questions (~30 minutes)

*Before this interview, you were asked to take a look at the QuitNow website, so I want to now hear about your reactions to the website and what it currently offers.*

1. Let's start with the overall look and feel.
  - a. What is your initial reaction?
  - b. How could it be improved?
2. What aspects of the website did you like?
  - a. What would you find helpful in quitting smoking?
  - b. What would keep you coming back?
3. What did you not like?
  - a. What are the major limitations of the site?
  - b. What makes you not want to come back to it?
4. How would you like to receive support on QuitNow?
5. Would you want the QuitNow forum to have discussion threads?
  - a. If you were at week 1, would you want to hear about what others did during week 12?
  - b. Alternatively, would you like to see threads based on themes (e.g., struggles, successes, triggers, motivations, etc.)?
  - c. Or do you prefer to just have an open forum?
6. What types of information would you like to see on QuitNow (e.g., benefits of quitting, consequences of not quitting, stories from others, tips to stay nicotine-free, suggestions for distractions, what to expect, etc.)?



**a place of mind**  
THE UNIVERSITY OF BRITISH COLUMBIA

7. What do you think of incorporating support for quitting e-cigarettes (e.g., Juul) on QuitNow?
  - a. How should it be different to cigarette cessation support?
  - b. How should it be similar?
8. You mentioned that you identify as Indigenous. Which nation do you belong to?
9. We understand that tobacco is considered a medicine in some Indigenous cultures. Is that the case with your nation as well?
  - a. How should this be honored in QuitNow?
10. What other aspects of your nation's culture or of Indigenous culture in general might be honored in QuitNow?
11. Outside of QuitNow, what are other aspects in your life that help facilitate reducing/quitting (e.g., social support, willpower, etc.)? How could/should these be incorporated into QuitNow?
12. What additional features would you like to see on QuitNow?
13. Thinking about what we have talked about so far, if you could provide the developers of QuitNow with some advice, what would it be?
14. Would you recommend QuitNow to your friends/family? Why or why not?
15. What might be some barriers (e.g., stress, friends/family who smoke) to quitting? How could/should these be mitigated by QuitNow?
16. Would you be more likely to use QuitNow on your mobile device or laptop?
17. If you could have anything you wanted, what would you want QuitNow have/do for you?
18. How could we get the word out that QuitNow exists?
19. If we were to do a follow up study with a focus group, would you be interested in taking part in that? We will contact you if we do this.
20. Would you like to receive the results of the study once it is published?

**Closing: final comments (5 minutes)**

Thank you for joining me today and helping us understand more about what we can do to improve BC's largest smoking cessation service. This will help us to tailor the website so that it is better able to meet the needs of BC residents who are trying to quit smoking or vaping. We are at the end of this session but before we leave, do you have any final thoughts that you would like to share?

way' limlæmt,| thank you

# Reporting checklist for qualitative study.

Based on the SRQR guidelines.

## EXPERIENCES OF NICOTINE USERS MOTIVATED TO QUIT DURING THE COVID-19 PANDEMIC: A SECONDARY QUALITATIVE ANALYSIS

### AUTHORS

-Ramona H. Sharma, BSc, MSW Student - School of Social Work, The University of British Columbia (Okanagan Campus), Kelowna, Canada

-Danielle Rodberg, BSN Student - School of Nursing, The University of British Columbia (Okanagan Campus), Kelowna, Canada

-Laura L. Struik, PhD, Assistant Professor - School of Nursing, The University of British Columbia (Okanagan Campus), Kelowna, Canada

|                     | Reporting Item                                                                                                                                                                                                                                          | Page Number |
|---------------------|---------------------------------------------------------------------------------------------------------------------------------------------------------------------------------------------------------------------------------------------------------|-------------|
| <b>Title</b>        |                                                                                                                                                                                                                                                         |             |
|                     | <a href="#">#1</a> Concise description of the nature and topic of the study identifying the study as qualitative or indicating the approach (e.g. ethnography, grounded theory) or data collection methods (e.g. interview, focus group) is recommended | 1-4         |
| <b>Abstract</b>     |                                                                                                                                                                                                                                                         |             |
|                     | <a href="#">#2</a> Summary of the key elements of the study using the abstract format of the intended publication; typically includes background, purpose, methods, results and conclusions                                                             | 2           |
| <b>Introduction</b> |                                                                                                                                                                                                                                                         |             |
| Problem formulation | <a href="#">#3</a> Description and significance of the problem / phenomenon studied: review of relevant theory and empirical work; problem statement                                                                                                    | 3-4         |



|    |                           |                     |                                                           |     |
|----|---------------------------|---------------------|-----------------------------------------------------------|-----|
| 1  |                           |                     |                                                           |     |
| 2  |                           |                     |                                                           |     |
| 3  |                           |                     |                                                           |     |
| 4  | Purpose or research       | <a href="#">#4</a>  | Purpose of the study and specific objectives or           | 4   |
| 5  | question                  |                     | questions                                                 |     |
| 6  |                           |                     |                                                           |     |
| 7  | <b>Methods</b>            |                     |                                                           |     |
| 8  |                           |                     |                                                           |     |
| 9  | Qualitative approach and  | <a href="#">#5</a>  | Qualitative approach (e.g. ethnography, grounded          | 4   |
| 10 | research paradigm         |                     | theory, case study, phenomenology, narrative              |     |
| 11 |                           |                     | research) and guiding theory if appropriate; identifying  |     |
| 12 |                           |                     | the research paradigm (e.g. postpositivist,               |     |
| 13 |                           |                     | constructivist / interpretivist) is also recommended;     |     |
| 14 |                           |                     | rationale. The rationale should briefly discuss the       |     |
| 15 |                           |                     | justification for choosing that theory, approach,         |     |
| 16 |                           |                     | method or technique rather than other options             |     |
| 17 |                           |                     | available; the assumptions and limitations implicit in    |     |
| 18 |                           |                     | those choices and how those choices influence study       |     |
| 19 |                           |                     | conclusions and transferability. As appropriate the       |     |
| 20 |                           |                     | rationale for several items might be discussed            |     |
| 21 |                           |                     | together.                                                 |     |
| 22 |                           |                     |                                                           |     |
| 23 |                           |                     |                                                           |     |
| 24 |                           |                     |                                                           |     |
| 25 |                           |                     |                                                           |     |
| 26 |                           |                     |                                                           |     |
| 27 |                           |                     |                                                           |     |
| 28 | Researcher                | <a href="#">#6</a>  | Researchers' characteristics that may influence the       | 4-5 |
| 29 | characteristics and       |                     | research, including personal attributes, qualifications / |     |
| 30 | reflexivity               |                     | experience, relationship with participants,               |     |
| 31 |                           |                     | assumptions and / or presuppositions; potential or        |     |
| 32 |                           |                     | actual interaction between researchers'                   |     |
| 33 |                           |                     | characteristics and the research questions, approach,     |     |
| 34 |                           |                     | methods, results and / or transferability                 |     |
| 35 |                           |                     |                                                           |     |
| 36 |                           |                     |                                                           |     |
| 37 |                           |                     |                                                           |     |
| 38 | Context                   | <a href="#">#7</a>  | Setting / site and salient contextual factors; rationale  | 3-5 |
| 39 |                           |                     |                                                           |     |
| 40 | Sampling strategy         | <a href="#">#8</a>  | How and why research participants, documents, or          | 4   |
| 41 |                           |                     | events were selected; criteria for deciding when no       |     |
| 42 |                           |                     | further sampling was necessary (e.g. sampling             |     |
| 43 |                           |                     | saturation); rationale                                    |     |
| 44 |                           |                     |                                                           |     |
| 45 |                           |                     |                                                           |     |
| 46 | Ethical issues pertaining | <a href="#">#9</a>  | Documentation of approval by an appropriate ethics        | 4   |
| 47 | to human subjects         |                     | review board and participant consent, or explanation      |     |
| 48 |                           |                     | for lack thereof; other confidentiality and data security |     |
| 49 |                           |                     | issues                                                    |     |
| 50 |                           |                     |                                                           |     |
| 51 |                           |                     |                                                           |     |
| 52 | Data collection methods   | <a href="#">#10</a> | Types of data collected; details of data collection       | 4-5 |
| 53 |                           |                     | procedures including (as appropriate) start and stop      |     |
| 54 |                           |                     | dates of data collection and analysis, iterative          |     |
| 55 |                           |                     |                                                           |     |
| 56 |                           |                     |                                                           |     |
| 57 |                           |                     |                                                           |     |
| 58 |                           |                     |                                                           |     |
| 59 |                           |                     |                                                           |     |
| 60 |                           |                     |                                                           |     |

|    |                              |                                                                           |      |
|----|------------------------------|---------------------------------------------------------------------------|------|
| 1  |                              |                                                                           |      |
| 2  |                              |                                                                           |      |
| 3  |                              | process, triangulation of sources / methods, and                          |      |
| 4  |                              | modification of procedures in response to evolving                        |      |
| 5  |                              | study findings; rationale                                                 |      |
| 6  |                              |                                                                           |      |
| 7  |                              |                                                                           |      |
| 8  | Data collection              | <a href="#">#11</a> Description of instruments (e.g. interview guides,    | 4-5  |
| 9  | instruments and              | questionnaires) and devices (e.g. audio recorders)                        |      |
| 10 | technologies                 | used for data collection; if / how the instruments(s)                     |      |
| 11 |                              | changed over the course of the study                                      |      |
| 12 |                              |                                                                           |      |
| 13 |                              |                                                                           |      |
| 14 | Units of study               | <a href="#">#12</a> Number and relevant characteristics of participants,  | 5-6  |
| 15 |                              | documents, or events included in the study; level of                      |      |
| 16 |                              | participation (could be reported in results)                              |      |
| 17 |                              |                                                                           |      |
| 18 |                              |                                                                           |      |
| 19 | Data processing              | <a href="#">#13</a> Methods for processing data prior to and during       | 4-5  |
| 20 |                              | analysis, including transcription, data entry, data                       |      |
| 21 |                              | management and security, verification of data                             |      |
| 22 |                              | integrity, data coding, and anonymisation /                               |      |
| 23 |                              | deidentification of excerpts                                              |      |
| 24 |                              |                                                                           |      |
| 25 |                              |                                                                           |      |
| 26 | Data analysis                | <a href="#">#14</a> Process by which inferences, themes, etc. were        | 5    |
| 27 |                              | identified and developed, including the researchers                       |      |
| 28 |                              | involved in data analysis; usually references a specific                  |      |
| 29 |                              | paradigm or approach; rationale                                           |      |
| 30 |                              |                                                                           |      |
| 31 |                              |                                                                           |      |
| 32 | Techniques to enhance        | <a href="#">#15</a> Techniques to enhance trustworthiness and credibility | 4-5  |
| 33 | trustworthiness              | of data analysis (e.g. member checking, audit trail,                      |      |
| 34 |                              | triangulation); rationale                                                 |      |
| 35 |                              |                                                                           |      |
| 36 |                              |                                                                           |      |
| 37 | <b>Results/findings</b>      |                                                                           |      |
| 38 |                              |                                                                           |      |
| 39 | Syntheses and                | <a href="#">#16</a> Main findings (e.g. interpretations, inferences, and  | 5-8  |
| 40 | interpretation               | themes); might include development of a theory or                         |      |
| 41 |                              | model, or integration with prior research or theory                       |      |
| 42 |                              |                                                                           |      |
| 43 |                              |                                                                           |      |
| 44 | Links to empirical data      | <a href="#">#17</a> Evidence (e.g. quotes, field notes, text excerpts,    | 6-8  |
| 45 |                              | photographs) to substantiate analytic findings                            |      |
| 46 |                              |                                                                           |      |
| 47 |                              |                                                                           |      |
| 48 | <b>Discussion</b>            |                                                                           |      |
| 49 |                              |                                                                           |      |
| 50 | Intergration with prior      | <a href="#">#18</a> Short summary of main findings; explanation of how    | 8-10 |
| 51 | work, implications,          | findings and conclusions connect to, support,                             |      |
| 52 | transferability and          | elaborate on, or challenge conclusions of earlier                         |      |
| 53 | contribution(s) to the field | scholarship; discussion of scope of application /                         |      |
| 54 |                              |                                                                           |      |
| 55 |                              |                                                                           |      |
| 56 |                              |                                                                           |      |
| 57 |                              |                                                                           |      |
| 58 |                              |                                                                           |      |
| 59 |                              |                                                                           |      |
| 60 |                              |                                                                           |      |

1  
2  
3  
4  
5  
6  
7  
8  
9  
10  
11  
12  
13  
14  
15  
16  
17  
18  
19  
20  
21  
22  
23  
24  
25  
26  
27  
28  
29  
30  
31  
32  
33  
34  
35  
36  
37  
38  
39  
40  
41  
42  
43  
44  
45  
46  
47  
48  
49  
50  
51  
52  
53  
54  
55  
56  
57  
58  
59  
60

generalizability; identification of unique contributions(s) to scholarship in a discipline or field

Limitations [#19](#) Trustworthiness and limitations of findings 10

#### Other

Conflicts of interest [#20](#) Potential sources of influence of perceived influence on study conduct and conclusions; how these were managed 11

Funding [#21](#) Sources of funding and other support; role of funders in data collection, interpretation and reporting 11

The SRQR checklist is distributed with permission of Wolters Kluwer © 2014 by the Association of American Medical Colleges. This checklist was completed on 26. April 2019 using <https://www.goodreports.org/>, a tool made by the [EQUATOR Network](#) in collaboration with [Penelope.ai](#)

# BMJ Open

## Experiences of Nicotine Users Motivated to Quit During the COVID-19 Pandemic: A Secondary Qualitative Analysis

|                                 |                                                                                                                                                                                                                 |
|---------------------------------|-----------------------------------------------------------------------------------------------------------------------------------------------------------------------------------------------------------------|
| Journal:                        | <i>BMJ Open</i>                                                                                                                                                                                                 |
| Manuscript ID                   | bmjopen-2022-070906.R2                                                                                                                                                                                          |
| Article Type:                   | Original research                                                                                                                                                                                               |
| Date Submitted by the Author:   | 18-May-2023                                                                                                                                                                                                     |
| Complete List of Authors:       | Sharma, Ramona; The University of British Columbia Okanagan, School of Social Work<br>Rodberg, Danielle; The University of British Columbia Okanagan, School of Nursing<br>Struik, Laura; UBC Okanagan, Nursing |
| <b>Primary Subject Heading</b>: | Smoking and tobacco                                                                                                                                                                                             |
| Secondary Subject Heading:      | Qualitative research, Public health, Oncology, Addiction                                                                                                                                                        |
| Keywords:                       | COVID-19, ONCOLOGY, PUBLIC HEALTH, SOCIAL MEDICINE                                                                                                                                                              |
|                                 |                                                                                                                                                                                                                 |

SCHOLARONE™  
Manuscripts



I, the Submitting Author has the right to grant and does grant on behalf of all authors of the Work (as defined in the below author licence), an exclusive licence and/or a non-exclusive licence for contributions from authors who are: i) UK Crown employees; ii) where BMJ has agreed a CC-BY licence shall apply, and/or iii) in accordance with the terms applicable for US Federal Government officers or employees acting as part of their official duties; on a worldwide, perpetual, irrevocable, royalty-free basis to BMJ Publishing Group Ltd ("BMJ") its licensees and where the relevant Journal is co-owned by BMJ to the co-owners of the Journal, to publish the Work in this journal and any other BMJ products and to exploit all rights, as set out in our [licence](#).

The Submitting Author accepts and understands that any supply made under these terms is made by BMJ to the Submitting Author unless you are acting as an employee on behalf of your employer or a postgraduate student of an affiliated institution which is paying any applicable article publishing charge ("APC") for Open Access articles. Where the Submitting Author wishes to make the Work available on an Open Access basis (and intends to pay the relevant APC), the terms of reuse of such Open Access shall be governed by a Creative Commons licence – details of these licences and which [Creative Commons](#) licence will apply to this Work are set out in our licence referred to above.

Other than as permitted in any relevant BMJ Author's Self Archiving Policies, I confirm this Work has not been accepted for publication elsewhere, is not being considered for publication elsewhere and does not duplicate material already published. I confirm all authors consent to publication of this Work and authorise the granting of this licence.

## EXPERIENCES OF NICOTINE USERS DURING COVID-19

**EXPERIENCES OF NICOTINE USERS MOTIVATED TO QUIT DURING THE COVID-19 PANDEMIC: A  
SECONDARY QUALITATIVE ANALYSIS****AUTHORS**

- Corresponding Author: Ramona H. Sharma, BSc, MSW Student - School of Social Work, The University of British Columbia (Okanagan Campus), Kelowna, Canada
  - Postal address: Faculty of Health and Social Development, 1147 Research Road, University of British Columbia Okanagan, Kelowna, BC Canada, V1V 1V7
  - Email: [ramona.sharma@ubc.ca](mailto:ramona.sharma@ubc.ca)
- Danielle Rodberg, BSN Student - School of Nursing, The University of British Columbia (Okanagan Campus), Kelowna, Canada
- Laura L. Struik, PhD, Assistant Professor - School of Nursing, The University of British Columbia (Okanagan Campus), Kelowna, Canada

**WORD COUNT**

6145 words

**KEYWORDS**

Nicotine, Smoking, Electronic Nicotine Delivery Systems, COVID-19

## ABSTRACT

**Objectives:** The COVID-19 pandemic has brought to light a variety of key factors that affect tobacco use, including behavioral patterns, social support and connection, and physical and mental health. What we do not know is how those motivated to quit were impacted by the pandemic. As such, understanding the unique experiences and needs of people motivated to quit smoking or vaping during the COVID-19 pandemic is critical. The aim of this study was to examine the cessation experiences of nicotine users during the COVID-19 pandemic. **Design:** We conducted a supplementary secondary analysis of primary qualitative data, i.e., semi-structured interviews with individuals engaged in cigarette use (smoking), e-cigarette use (vaping), and dual use. **Setting:** British Columbia, Canada. **Participants:** Relevant data were drawn from 33 participants out of the primary study's 80-participant sample pool. **Measures:** Interview questions explored barriers and facilitators to quitting nicotine use. We then used conventional content analysis to identify relevant and additional emergent themes and subthemes surrounding pandemic-specific barriers and facilitators to quitting, and unique needs for cessation support in the context of the COVID-19 pandemic. **Results:** Pandemic-specific barriers included lifestyle limitations and poor mental health due to isolation. Facilitators to quitting during the pandemic included reduced access and opportunities to use nicotine products, as well as time for personal reflection on nicotine use behaviors. Suggestions for cessation programming included a primary focus on enhancing social support features (e.g., discussion forums, support groups), followed by increasing awareness of the benefits of quitting, and enhancing visibility of resources available to support quitting. **Conclusions:** The findings provide directions for how cessation supports can be tailored to better meet the needs of users motivated to quit during and beyond the COVID-19 pandemic.

## STRENGTHS AND LIMITATIONS OF THIS STUDY

- Our qualitative approach provides detailed data on the unique needs of nicotine users hoping to quit in both pandemic and post-pandemic contexts.
- We recruited a diverse array of participants, including smokers, vapers, and dual users.
- The larger study that the present data is derived from was not designed to investigate pandemic-specific factors influencing quitting, which may impact generalizability.

## INTRODUCTION

Globally, nicotine addiction continues to remain one of the most significant public health threats [1]. However, many nicotine users of all ages report a desire to quit [2]. Environmental and psychosocial factors play a key role in shaping cessation and reduction trajectories, including the availability of appropriate and accessible supports, diversity and accessibility of available nicotine products, federal and regional policies, historical contexts such as ongoing economic, public health, and socio-political events, and individual characteristics such as mental health, income, education, and social support [3]. One example of a significant and multifaceted environmental factor that has influenced tobacco use behaviors is the recent COVID-19 pandemic.

Tobacco use patterns and cessation trajectories appear to have shifted in various directions because of the pandemic with some users reporting an increase in usage and others reporting a decrease in usage. The variability of these reports aligns with changes seen in Canadian vaping rates. According to the Canadian Tobacco and Nicotine Survey (CTNS), youth between the ages of 15 to 19 demonstrated a decrease in vaping with 15% of youth vaping in the past 30 days in 2019 compared to 13% in 2021 [4-5]. However, other age ranges showed an increase in vaping with an increase from 15% to 17% among adults ages 20 to 24 and an increase of 3% to 4% among adults aged 25 and older [4-5]. This increase in use is disproportionate among certain groups, and researchers have brought forward how the pandemic has interacted with and subsequently enhanced pre-pandemic tobacco-related health risks among disadvantaged groups [6].

Mental health appears to play a major role in increased use of tobacco products during the pandemic. In Canada, individuals who reported having fair or poor mental health in 2020 were more likely to have increased their use of nicotine products [7]. Among Canadians who vaped in the past 30 days in 2021, 18% reported that their main reason for vaping was to reduce stress and anxiety [8]. Stress reduction was more commonly reported as the main reason for vaping by youth aged 15 to 19 in 2020 (33%) compared to 2019 (21%) [8]. Similarly, many cigarette users have discussed experiencing a sense of relief from smoking with individuals smoking more to cope with the stress of the pandemic and experience a sense of calm [9].

In contrast, for some nicotine users, the pandemic was accompanied by a decrease in nicotine use and an increase in motivation to quit. From an international lens, global trends show smoking rates have been trending downwards since the onset of the pandemic. In the United States, use of a tobacco product within the past 30 days decreased significantly from 2019 to 2021 among both high school and middle school students from 31% to 13% and 12% to 4%, respectively [10-11]. As well, e-cigarette usage rates among middle to high school students showed momentous decline from 27% to 11% [10-11]. Data from the Netherlands shows smoking cessation motivations were associated with concern regarding heightened risk for developing severe illness and needing to quit to reduce complaints from others in the household during isolation [12]. However, national data from the Netherlands shows minimal declines in smoking across the timeline of the pandemic with adult smoking rates declining from 22% in 2019 to 21% in 2021 [13-14]. Other countries showed more significant reductions, with smoking experiencing a possible decline in New Zealand from 14% (2019) to 11% (2021), a more significant change than those reported in years prior, and Scotland even more so from 17% (2019) to 11% (2021), [15-17]. Similarly, in the same time period, e-cigarette usage in Scotland appeared to decline, with rates



1  
2  
3 shrinking from 7% to 5%, after remaining at 7% since 2015 [16-17]; by contrast, e-cigarette use in New  
4 Zealand increased from 4% to 6% throughout the pandemic [15].

5  
6 In sum, worldwide, the rates of pandemic nicotine use demonstrate significant variability.  
7 Furthermore, statistics on nicotine use before and after the onset of the pandemic (e.g., from 2019  
8 compared to 2020 or 2021) may be subject to methodological differences and associated reporting  
9 biases due to changes in data collection strategies as a result of pandemic-specific restrictions; in fact,  
10 this was explicitly highlighted by a number of the abovementioned statistics [10, 13, 15-17]. This in  
11 combination to the overall variation in rates of use lends to added challenges in interpreting,  
12 summarizing, and comparing the nicotine use behaviors of users before, during, and after the pandemic,  
13 and warrants an in-depth exploration of their experiences.  
14  
15

16 Finally, the COVID-19 pandemic has facilitated the emergence of alternative health care  
17 modalities; more people are turning to website, SMS, and/or telephone-based healthcare modalities,  
18 including resources for cessation support [12]. Simultaneously, the COVID-19 pandemic led to a  
19 reduction in existing cessation supports due to closures and staffing, infrastructure, and resource  
20 shortages [18]. These rapid changes to available cessation resources and programming likely affected  
21 the trajectory of those trying to quit. Understanding how cessation was impacted and how individuals'  
22 cessation needs shifted is critical to informing the development of more responsive and adaptive  
23 cessation resources that consider the unique influence of the pandemic [19]. As a result, the aim of this  
24 study is to explore the cessation experiences of nicotine users motivated to quit during the COVID-19  
25 pandemic.  
26  
27  
28  
29

## 30 **METHODS**

### 31 **Design**

32  
33 We conducted a supplementary secondary analysis of primary qualitative data using in order to  
34 examine participant perspectives and experiences uniquely related to quitting during the COVID-19  
35 pandemic [20]. Our method was data-driven in the sense that COVID-19 was not a topic specifically  
36 addressed by our interview guides, but was rather raised by the informants as discovered after primary  
37 data analysis. In other words, upon completion of primary data analysis, we noticed a theme of several  
38 participants describing novel and unexpected nicotine-related experiences that happened solely due to  
39 the pandemic. To explore this in depth and provide voice to the sub-set of participants who discussed  
40 COVID-specific experiences, we conducted a post-hoc retrospective interpretation of previously coded  
41 data through keyword searching and conventional content analysis, an inductive methodology that  
42 allows for development and quantification of codes, categories, and themes reported in data [20]. In  
43 addition to identifying general themes as discussed by participants, we sought to understand COVID-19-  
44 specific barriers and facilitators to quitting nicotine, which builds on the following questions asked in the  
45 primary research study: (1) "What might be some barriers to quitting?"; (2) "What are other aspects of  
46 your life that help facilitate reducing/quitting?"  
47  
48  
49  
50  
51

52 Ethical approval was received from the Behavioral Research Ethics Board at the University of  
53 British Columbia's Okanagan campus (#H21-00145). The design and analyses within this study were not  
54 pre-registered on a publicly available platform; as such, the results should be considered exploratory.  
55 The Standards for Reporting Qualitative Research (SRQR) reporting guidelines were used for quality  
56  
57  
58  
59  
60

1  
2  
3 appraisal [16]. Reflexivity was maintained by the research team throughout data analysis and  
4 manuscript writing by recording, discussing, and challenging established assumptions at all data  
5 collection and analysis stages.  
6  
7

## 8 Primary Study

9  
10 In the primary study, we conducted semi-structured interviews with 80 participants across  
11 British Columbia (BC), Canada between May to August 2021; these lasted between 30-60 minutes in  
12 duration. The purpose of this study was to understand the cessation needs of BC residents to inform  
13 improvements for online cessation programming (see online supplementary file 1 for the interview  
14 guide, which includes details of other question topics, such as motivations behind participants' nicotine  
15 use and cessation patterns and needs with respect to a free, provincially funded online cessation  
16 support, QuitNow).  
17

18 Eligible participants were recruited through targeted Facebook and Instagram ads via a third  
19 party (PH1 Research). Participants met the following eligibility criteria: motivated to quit vaping or  
20 smoking, ages 16 and over, able to communicate in English, and able to provide informed consent. To  
21 provide informed consent, individuals who demonstrated interest were emailed an information sheet  
22 describing study purposes and procedures, potential benefits/risks of participating, confidentiality,  
23 remuneration and funding sources, researcher contact information, and consent (i.e., how to provide it,  
24 and what consenting meant). They were then able to provide informed consent (i.e., their  
25 understanding of the nature of the study, their consent to participate, and their consent to having their  
26 interview audio-recorded) via two options: (1) in writing by e-mail at their convenience, or (2) verbally at  
27 the beginning of their audio-recorded interview with a research team member (scheduled based on  
28 their preferred availability).  
29  
30  
31  
32

33 Participants completed a demographic survey and an audio-recorded UBC Zoom interview, after  
34 which they received a \$50 online gift card to thank them for their time and input. These interviews were  
35 transcribed and analyzed by the research team using NVivo qualitative data analysis software.  
36 Participant interviews were undertaken by four researchers (author RS and further individuals named in  
37 Acknowledgements) of various disciplines (social work, nursing, kinesiology) who received identical  
38 training and utilized a pre-established interview guide to minimize individual differences in interview  
39 outcomes as a result of interviewer characteristics. Conscious efforts were made to seek elaboration  
40 and clarification from participants and not to accept potentially common assumptions at face value. No  
41 authors were known to any participants of this research prior to undertaking the study.  
42  
43  
44  
45

## 46 Data Collection

47 Two researchers (authors RS and DR) collected data on participant experiences surrounding  
48 COVID-19 and its influence on participant nicotine use and cessation needs. In each NVivo demographic  
49 file (n=80) from the primary study, keywords such as "COVID-19", "pandemic", "COVID", "lockdown",  
50 "isolation", "home", "stay AND home", "public AND health AND order", "health AND order", "virtual",  
51 "remote", "online", "Zoom", "work AND home", "not AND working", "working AND less" were searched.  
52

53 As only a subset of participants discussed COVID-19-related topics and as the pre-coded NVivo  
54 files were organized in relation to the interview questions asked in the primary study, this approach on  
55 the basis of keyword searching was utilized to (1) rapidly identify the participants that discussed COVID,  
56  
57  
58  
59

1  
2  
3 and (2) identify COVID-specific themes *within* the responses provided to the abovementioned interview  
4 questions (i.e., within barriers and facilitators to quitting). The specific keywords used were identified by  
5 the authors RS and DR in a collaborative brainstorming session as terms commonly used by the general  
6 population (as well as by participants as recalled from primary interviews) when discussing pandemic-  
7 related events in conversation, in current events and news, and on social media. As participant accounts  
8 emerged while searching, more keywords were identified as discovered.  
9

10  
11 Once all participants that discussed COVID-specific topics were identified via keyword searching,  
12 their full interview transcripts were reviewed as well to ensure any details from their unique experiences  
13 were not missed. In total, 33 participants discussed the impact of COVID-19 on their cessation  
14 experiences. All these responses were collected and compiled in a Word document.  
15

### 16 17 **Data Analysis**

18 Upon compilation of participant responses, two collaborative coding sessions were held and, via  
19 inductive content analysis [20], a codebook was created and applied to all relevant responses to identify  
20 common patterns among participant cessation experiences and needs during the pandemic. We then  
21 charted all themes and subthemes onto Excel software to allow for visualization and comparison of  
22 major findings. Finally, we disaggregated all identified themes and subthemes by gender, nicotine user  
23 type, and age, and Indigeneity, and did not find significant differences in theme endorsement between  
24 the stated groups; however, within subthemes, we made note of unique nuances in responses provided  
25 by Indigenous participants due to the unique factors affecting Indigenous peoples in Canada in relation  
26 to tobacco and nicotine use as a result of the ongoing and residual intergenerational impacts of  
27 colonization [21].  
28  
29  
30  
31  
32

### 33 **Patient and Public Involvement**

34 Participants were not involved in any aspect of the study design, recruitment, or conduct of neither  
35 the primary nor the present study. Upon recruitment for the primary study, participants were asked if  
36 they would like to receive the research findings via email upon completion of the study; findings will be  
37 disseminated through a written summary to participants who opted in. Academic outputs will be  
38 disseminated through social media and community networks.  
39  
40  
41

## 42 **RESULTS**

### 43 44 **Sample**

45 Participants included in this study (N=33) were primarily male (55%), and of various racial and  
46 ethnic backgrounds, with White (European) heritage being the most frequently cited (33%), followed by  
47 Indigenous (27%), defined as an Aboriginal person of Canada (First Nations, Métis, and Inuit). Most of  
48 the sample was between 16 and 29 years old (57%), with the remaining 43% aged 30 and older. Finally,  
49 most participants were dual users of both combustible cigarettes and e-cigarettes (40%), followed by  
50 only smokers (33%), and only vapers (27%). A complete breakdown of participant characteristics is  
51 provided below in Table 1.  
52  
53  
54

55  
56 Table 1. Participant characteristics  
57  
58  
59  
60

| Demographic    |                              | n (%*)  |
|----------------|------------------------------|---------|
| Gender         | Female                       | 15 (45) |
|                | Male                         | 18 (55) |
| Race/Ethnicity | White                        | 11 (33) |
|                | Indigenous                   | 9 (27)  |
|                | Asian                        | 4 (12)  |
|                | South Asian                  | 2 (6)   |
|                | Latin American               | 1 (3)   |
|                | Black                        | 1 (3)   |
|                | Biracial/Multiracial         | 2 (6)   |
|                | Other/Not Listed             | 3 (9)   |
| Age            | 16-18                        | 6 (18)  |
|                | 19-24                        | 7 (21)  |
|                | 25-29                        | 6 (18)  |
|                | 30+                          | 14 (43) |
| Nicotine Use   | Smokers (Cigarettes-Only)    | 11 (33) |
|                | Vapers (Vapor Products-Only) | 9 (27)  |
|                | Dual Users                   | 13 (40) |

\*Expressed as a percentage of the total sample (N=33).

## Themes

From participant reports, we found several themes that fit within the following three thematic categories: (1) barriers to quitting nicotine use during the pandemic; (2) facilitators to quitting or reducing nicotine use during the pandemic; and (3) suggestions for improving cessation programming during the pandemic. The breakdown of these themes, as well as associated frequencies of endorsement ('n' being the number of participants endorsing the category/theme/subtheme) and percentages (as a proportion of the total sample for categories and themes, and of the respective category for subthemes), are outlined in Table 2.

Table 2. Themes and subthemes discussed by participants and associated frequencies (n) and percentages (%) of participants endorsing these

| Categories<br>(n, %*)                                                                         | Themes<br>(n, %*)                                                                                                                                                                                                                 | Subthemes<br>(n, %**)                                                                                                                                                                                                                                                                                                                                                                                                                                                                                                                                                             |
|-----------------------------------------------------------------------------------------------|-----------------------------------------------------------------------------------------------------------------------------------------------------------------------------------------------------------------------------------|-----------------------------------------------------------------------------------------------------------------------------------------------------------------------------------------------------------------------------------------------------------------------------------------------------------------------------------------------------------------------------------------------------------------------------------------------------------------------------------------------------------------------------------------------------------------------------------|
| <b>Barriers to quitting/reducing nicotine use during the pandemic</b><br><br><b>(21, 64%)</b> | <b>Isolation, uncertainty, and shifts in environment and lifestyle</b> (due to fewer activities, increased boredom, diminished socializing, altered home social environment, loss of existing coping strategies/activities, etc.) | Smoking/vaping <u>more</u> to: <ul style="list-style-type: none"> <li>• Curb boredom (6, 29%)</li> <li>• Cope with triggers (3, 14%)</li> <li>• Be able to go outside (2, 10%)</li> <li>• Get away from screens ("Zoom fatigue") (2, 29%)</li> <li>• Satisfy the need to use hands when engaging in repetitive activities (TV; homework) (1, 5%)</li> </ul> Smoking/vaping <u>more</u> due to: <ul style="list-style-type: none"> <li>• Not knowing if/where one could go outside the home (2, 10%)</li> <li>• Being away from workplaces that restricted use (2, 10%)</li> </ul> |

|                                                                                                    |                                                                                                                                                                |                                                                                                                                                                                                                                                                                                                                                                                                                                                                                                                                                                                                                                                                                                                                                                      |
|----------------------------------------------------------------------------------------------------|----------------------------------------------------------------------------------------------------------------------------------------------------------------|----------------------------------------------------------------------------------------------------------------------------------------------------------------------------------------------------------------------------------------------------------------------------------------------------------------------------------------------------------------------------------------------------------------------------------------------------------------------------------------------------------------------------------------------------------------------------------------------------------------------------------------------------------------------------------------------------------------------------------------------------------------------|
|                                                                                                    | (16, 48%)                                                                                                                                                      | <ul style="list-style-type: none"> <li>• Being indoors with other users (2, 10%)</li> <li>• Not being able to spend time with non-users (2, 10%)</li> </ul>                                                                                                                                                                                                                                                                                                                                                                                                                                                                                                                                                                                                          |
|                                                                                                    | <p><b>Increased stress and worsened mental health</b> (due to lack of support, reduced access to social and professional supports, etc.)</p> <p>(8, 24%)</p>   | <p>Smoking/vaping <u>more</u> to:</p> <ul style="list-style-type: none"> <li>• Cope with general stress and anxiety (5, 24%)</li> <li>• Cope with work-related stress and anxiety (3, 14%) <ul style="list-style-type: none"> <li>○ Due to working from home (blurring of boundaries between work/home) (2, 10%)</li> <li>○ Due to working in-person (fear of getting sick; less time off; burnout) (1, 5%)</li> </ul> </li> </ul> <p>Smoking/vaping <u>more</u> due to:</p> <ul style="list-style-type: none"> <li>• Lack of COVID-specific mental health supports (3, 14%)</li> <li>• Lack of incorporation of general and COVID-specific trauma (e.g., deaths of loved ones) and associated vulnerabilities of certain populations in supports (1, 5%)</li> </ul> |
| <p><b>Facilitators to quitting/reducing nicotine use during the pandemic</b></p> <p>(11, 33%)</p>  | <p><b>Reduced access to nicotine products and opportunities for usage</b> (due to fewer/restricted social events, business closures, etc.)</p> <p>(6, 18%)</p> | <p>Smoking/vaping <u>less</u> due to:</p> <ul style="list-style-type: none"> <li>• Less opportunities to be around users (3, 27%)</li> <li>• Less social pressure (3, 27%)</li> <li>• Inability to purchase smoke/vape products (e.g., underage vapers) (1, 9%)</li> </ul>                                                                                                                                                                                                                                                                                                                                                                                                                                                                                           |
|                                                                                                    | <p><b>Increased introspection and reflection on own behaviours</b> (due to increased time alone)</p> <p>(5, 15%)</p>                                           | <p>Smoking/vaping <u>less</u> to:</p> <ul style="list-style-type: none"> <li>• Improve own lung health (2, 18%)</li> <li>• Save money (to travel, see loved ones) (2, 18%)</li> </ul> <p>Smoking/vaping <u>less</u> due to:</p> <ul style="list-style-type: none"> <li>• Seeing others quit during the pandemic (2, 18%)</li> <li>• Fear of contracting COVID (1, 27%)</li> <li>• Identifying new cognitive strategies to cope with negative emotions (1, 27%)</li> </ul>                                                                                                                                                                                                                                                                                            |
| <p><b>Suggestions for improving cessation programming during the pandemic</b></p> <p>(19, 58%)</p> | <p><b>Enhance social support features</b> (virtual and in-person)</p> <p>(11, 33%)</p>                                                                         | <p>Virtual supports:</p> <ul style="list-style-type: none"> <li>• Zoom meetings (3, 16%)</li> <li>• Discussion forums (3, 16%)</li> <li>• Group chats (2, 11%)</li> </ul> <p>In-person supports:</p> <ul style="list-style-type: none"> <li>• Small support groups (2, 11%)</li> <li>• Plans for in-person activities when restrictions ease (2, 11%)</li> </ul>                                                                                                                                                                                                                                                                                                                                                                                                     |
|                                                                                                    | <p><b>Increase awareness of quitting benefits during the pandemic</b></p> <p>(7, 21%)</p>                                                                      | <p>Health benefits:</p> <ul style="list-style-type: none"> <li>• Discuss health implications of smoking/vaping and quitting (4, 21%)</li> </ul> <p>Financial benefits:</p> <ul style="list-style-type: none"> <li>• Discuss financial implications of smoking/vaping during pandemic layoffs (3, 16%)</li> <li>• Provide financial incentives (monetary rewards) (1, 5%)</li> </ul>                                                                                                                                                                                                                                                                                                                                                                                  |

|  |                                                                                                                     |                                                                                                                                                                                                                                                                                                                                                                                                 |
|--|---------------------------------------------------------------------------------------------------------------------|-------------------------------------------------------------------------------------------------------------------------------------------------------------------------------------------------------------------------------------------------------------------------------------------------------------------------------------------------------------------------------------------------|
|  | <p><b>Provide pandemic-specific resources and advice for trying to quit during the pandemic</b></p> <p>(5, 15%)</p> | <p>Target visible locations for dissemination:</p> <ul style="list-style-type: none"> <li>• Social media (4, 15%)</li> <li>• In-person locations where people are able to go (grocery stores, health facilities) (2, 11%)</li> </ul> <p>Include culturally relevant practices for Indigenous nicotine users, e.g.:</p> <ul style="list-style-type: none"> <li>• Sweat lodges (1, 5%)</li> </ul> |
|--|---------------------------------------------------------------------------------------------------------------------|-------------------------------------------------------------------------------------------------------------------------------------------------------------------------------------------------------------------------------------------------------------------------------------------------------------------------------------------------------------------------------------------------|

\*Expressed as a percentage of the total sample (N=33).

\*\*Expressed as a percentage of the respective category (n indicated in first column).

### Barriers to quitting nicotine use during the pandemic

Numerous participants (64%) reported experiencing barriers to quitting nicotine use during the pandemic, particularly in relation to pandemic-specific isolation. Approximately half (48%) of all participants said the lifestyle limitations they experienced due to the pandemic were a barrier for them. Many participants described how isolation measures resulted in a reduction in activities individuals could attend, limitations on socializing, and subsequently, an increase in boredom:

‘Last year for me personally, my partner and I planned on quitting and then COVID happened, and we didn’t have anything to keep ourselves entertained so that’s how we just fell back into the pit’ (Participant 84, Indigenous female).

In this vein, individuals saw smoking and vaping as an activity to pass the time while being confined to their home environment, despite many not wanting to smoke or vape. In relation to boredom, one participant also described vaping to satiate the desire to do something with their hands while engaging in monotonous activities that became everyday activities during the pandemic, such as watching TV:

‘Since COVID, [vaping] is just something to do especially if I’m like doing homework all day or watching something all day every day and want to do something with my hands’ (Participant 94, Indigenous female).

In addition, participants highlighted pandemic-specific isolation as a barrier to being able to engage in the alternate activities and distractions they usually use to cope with nicotine-specific triggers and cravings. Participants also noted how isolation combined with uncertainty on what they were able to do outside the home in the context of provincial stay-home orders and recommendations created a unique situation which further magnified isolation as a barrier:

‘Instead of smoking, we’d be going on a hike, or for a walk... That being said, I don’t necessarily know the rules because of this pandemic and what’s allowed’ (Participant 32, male).

A couple of participants even reported that nicotine usage provided them with a reason to go outside during the pandemic when they were otherwise advised to remain indoors:

1  
2  
3 'While being stuck at home with the pandemic it was kind of nice to just have a break to get  
4 outside. I think for a while there, I wanted to smoke because I was spending all day, every day  
5 inside my house on Zoom, so smoke breaks were a way to get outside' (Participant 59, male).  
6  
7

8 Interestingly, a few more participants specifically described wanting to leave the house to engage in  
9 nicotine use after encountering unavoidable "Zoom-fatigue", or other computer-related fatigue due to  
10 elevated screen time as a result of the sudden transfer of school and work settings to virtual platforms:  
11  
12

13 'I think the hardest part is being busy all day long with Zoom fatigue or being on the computer  
14 all day during a pandemic. This is my primary source of employment and I'm finding that I just  
15 want to walk away from the computer sometimes, so I end up [leaving the house to smoke]'  
16 (Participant 34, male).  
17  
18

19 Similarly, a few participants described being home instead of at work all day proved problematic  
20 for them, as their work settings provided protective factors for reducing use through regulations or  
21 other environmental factors:  
22  
23

24 'If I had to go to work and be at work all day, I wouldn't smoke all day at work because according  
25 to my work I can't smoke. It's terrible right now during this pandemic where I'm home and I can  
26 [smoke all day]' (Participant 62, male).  
27  
28  
29

30 Furthermore, some participants reported that being confined to their home environment created an  
31 inconducive environment for cessation, due to a lack of in-person support from family members, like  
32 being trapped in an environment with smokers:  
33  
34

35 'I never smoked before COVID, but with COVID you're hanging out with the same people in the  
36 same bubble so you're doing what everyone is doing together. I think once COVID restrictions  
37 ease up it might make it easier [to not smoke] and then you can go outside of your bubble and  
38 hang out with people who don't, like all my other friends don't' (Participant 29, female).  
39  
40  
41

42 Another prominent barrier to quitting was an elevated level of stress during the pandemic and  
43 associated with this, poor mental health. While some participants just spoke of general stress due to the  
44 pandemic, several participants identified employment and school as specific stressors during the  
45 pandemic – both as a result of having to work at home or long hours outside the home. According to  
46 nearly a quarter (24%) of participants, nicotine use helped them cope with this stress:  
47  
48

49 'I'm working from home because of COVID. When I feel under a lot of pressure, I reach towards  
50 cigarettes...' (Participant 76, Indigenous male).  
51  
52

53 'COVID just added so much stress. I work in a produce warehouse, so I never really got time off.  
54 I've worked through this whole pandemic, and I never got one day off, and it wears on you. Plus,  
55 what if I get sick, I don't wanna think of that, so I [smoke]' (Participant 73, Indigenous male).  
56  
57  
58  
59  
60

1  
2  
3  
4  
5  
6  
7  
8  
9  
10  
11  
12  
13  
14  
15  
16  
17  
18  
19  
20  
21  
22  
23  
24  
25  
26  
27  
28  
29  
30  
31  
32  
33  
34  
35  
36  
37  
38  
39  
40  
41  
42  
43  
44  
45  
46  
47  
48  
49  
50  
51  
52  
53  
54  
55  
56  
57  
58  
59  
60

In addition, a few participants spoke of a lack of pandemic-specific mental health supports in the context of provincial stay-at-home regulations and ongoing COVID-related stress and trauma, which exacerbated existing barriers, created further barriers for coping with mental health, and led them to smoke and vape instead:

'[The government] put [restrictions] down during COVID and put everyone under more stress with no mental health supports... I have a job, I have a nice house and I still can't get therapy... but I can [smoke]' (Participant 46, female).

'I've used the tools that [online provincial cessation supports] have to get away from smoking... But for some people or some populations, it really doesn't help sometimes. Like I work a very stressful job, and my life is very stressful, more than the average person. I've had four deaths in the last year. They talk about stress, but [don't] exactly target the added stress of calling family in and telling them people died. It just makes it hard' (Participant 76, Indigenous male).

Facilitators to quitting or reducing nicotine use during the pandemic

A third (33%) of participants reported encountering facilitators for quitting nicotine use during the pandemic. A major theme reported by 18% was that the pandemic reduced accessibility and opportunities to smoke/vape. A few individuals reported this was because they were unable to attend social gatherings (e.g., parties) that were often associated with peer pressure to smoke/vape:

'... if you smoke or vape in a more social setting, that all goes out the window with the Coronavirus...' (Participant 13, male).

In addition, a few individuals discussed how reduced access to nicotine-related products due to store closures, lockdowns, and isolation measures made it easier for them to reduce their nicotine usage:

'My vape broke at the beginning of the pandemic when all the stores were closed and nobody was going anywhere. I wasn't able to fix it, and I couldn't exactly ask my parents to go buy me a new vape, so I ended up pretty much quitting around then which was not fun but in hindsight was a stroke of luck' (Participant 31, male).

'I do have one friend that quit, and he was somebody that said I'll never quit, it's not a problem, I'll do it my whole life . . . When COVID happened, and he couldn't go to any stores, he realized how horrible he felt because of it. And just from that one second and being like, okay, my lungs hurt less, it drove him to quit, which was motivating for me' (Participant 20, female).

As such, another facilitator commonly reported (15%) by participants was that the pandemic prompted individuals to become more introspective on their smoking/vaping behaviours, as well as on their behaviours that indirectly contributed to smoking/vaping, e.g.:



1  
2  
3 'Sometimes when I'm irrational and mad that will make me smoke and I learned to rationalize a  
4 lot more during this pandemic with all the time alone and away' (Participant 47, male).  
5  
6

7 Indeed, people approached introspection with a variety of motivations. For example, as quoted above, a  
8 few participants said witnessing someone in their social circle quit during the pandemic increased their  
9 own motivation for quitting. Similarly, some stated that they wanted to quit to improve their lung health  
10 given the elevated negative respiratory impacts of COVID-19 on smokers, and others said they wanted  
11 to save money for post-pandemic activities, such as traveling and seeing their families:  
12  
13

14 'I want to travel again. But now you can't travel. I'm saving up for travelling right now and not  
15 for vaping... if I save enough money, I might actually be able to see my family... I can actually go  
16 home after this silly pandemic is over' (Participant 73, Indigenous male).  
17  
18  
19

20 Suggestions for improving cessation programming during the pandemic

21 Over half of participants (55%) made comments in reference to improvements they would have  
22 liked to see with online nicotine cessation supports during COVID-19. Participants had a variety of  
23 suggestions, such as identifying unique coping strategies for people who are more isolated due to  
24 COVID. The most common recommendation (33%) was to enhance social support features. The loss of  
25 social connection during the pandemic emphasized the need to ensure that social support was available  
26 to nicotine users in this context. In addition to in-person support groups, individuals advised that  
27 programming incorporate virtual support in the form of meetings via Zoom or online discussion forums  
28 to connect with others:  
29  
30  
31

32 'I think organizing Zoom meetings or small group chats where you can say what you've  
33 accomplished and how you're struggling right now and then maybe create a few friends who are  
34 all trying to quit together' (Participant 37, male).  
35  
36  
37

38 'Forums are a really positive thing as well, because it allows people to talk to each other,  
39 especially now with COVID. We're all isolated and quitting smoking, and when you're isolated it  
40 can be even harder, because we're all under stress. So, I think being able to have a connection  
41 like that through a community where people can talk to each other and feel support, even if it's  
42 online, is good' (Participant 46, female).  
43  
44  
45

46 Many participants (21%) also suggested that programming increase awareness of the benefits of  
47 quitting specifically in relation to COVID-19. Individuals believed that since COVID-19 is a respiratory  
48 disease, widely disseminating information on the risks and health impacts of COVID-19 in relation to  
49 smoking/vaping would resonate with users:  
50  
51

52 'Smoking and COVID should be more prevalent. I think I think the COVID piece is a valuable thing  
53 to the developers to think about because it's such a hot word, and there's a lot of talk about  
54 respiratory illnesses' (Participant 48, female).  
55  
56  
57  
58  
59  
60

1  
2  
3 Participants also mentioned that, as people were more attentive to money-related matters  
4 during the times of unemployment from COVID-19 layoffs, discussing financial implications of  
5 smoking/vaping and providing monetary incentives and rewards to quitting might provide an additional  
6 motivation to quit during the pandemic:  
7  
8

9  
10 'I guarantee if people are scrolling through this, and they see the average smoker spends \$3,000  
11 a year on cigarettes, especially during COVID when people are losing their jobs, that would be a  
12 pretty big selling point' (Participant 64, Indigenous male).  
13

14  
15 'I love Vancouver [BC], it's the best place in the world, but it's also ridiculously expensive. Right  
16 now, for a lot of people, money is a big issue because with COVID people are out of work. That is  
17 an incentive so giving something monetary would be a reward' (Participant 39, male).  
18

19  
20 Finally, several participants (15%) also highlighted a need for increased awareness of pandemic-  
21 tailored resources and advice for those trying to quit during the pandemic. Suggestions included  
22 advertising through social media and at locations that coincided with the lifestyle of the public during  
23 the pandemic (e.g., grocery stores and health centres). Additionally, as the pandemic resulted in  
24 boredom and a loss of previously established coping strategies, participants suggested activities to  
25 replace smoking/vaping and help people fill their free time and cope, including tailored and culturally  
26 relevant practices for Indigenous nicotine users:  
27  
28

29  
30 'I think maybe having a different strategy for people that are more isolated throughout COVID  
31 versus once restrictions start easing out so maybe they could recommend some other strategies  
32 and distractions, let's say as an example, going for a walk' (Participant 29, female).  
33  
34

35  
36 'I know some people who were chronic major smokers do like the sweat lodge, which helps  
37 clean you out and stuff, so having resources for First Nations people, say in Kamloops [BC],  
38 letting people know they they're going to do a smoking cleanse would be helpful. But I know  
39 with COVID its extremely difficult' (Participant 69, Indigenous female).  
40  
41

## 42 DISCUSSION

43

44  
45 The present study highlights the impacts of the COVID-19 pandemic on individual nicotine  
46 cessation journeys. In addition, it establishes the importance of cessation support remaining up-to-date  
47 and considering the new and ever-changing psychosocial and socio-environmental factors that come  
48 with a global crisis. Finally, it speaks to the significance of centering participant voices and learning  
49 firsthand from nicotine users about their unique needs as it relates to barriers and facilitators to  
50 successfully quitting nicotine use.  
51

52  
53 The pandemic revealed unique vulnerabilities of nicotine users that were not previously  
54 emphasized, such as the effects of boredom, stress, and isolation. Isolation was a noteworthy barrier to  
55 quitting tobacco use according to this study. It is important to situate the concept of isolation within the  
56 macro-level socioenvironmental determinants that led to isolation for this sample. At the time of data  
57  
58

1  
2  
3 collection, the Province of British Columbia had authorized a number of COVID-specific protective  
4 measures such as restricting capacities at gatherings, businesses, and private events, including partial or  
5 complete closures; suspending interprovincial travel (in addition to federal international travel bans);  
6 introducing vaccines in age- and vulnerability-based phases (e.g., elderly and Indigenous populations  
7 first); and enacting specific restrictions for the partial- and non-vaccinated [22]. Measures were variable  
8 to sudden changes in accordance with the evolving nature of the pandemic [22]. As such, many  
9 participants talked about how isolation as a result of the above led to immense boredom. Boredom has  
10 been found to play a key role in increased alcohol and cannabis consumption during the pandemic [23],  
11 and our findings reveal that this similarly applies to use of tobacco products. The inability to engage in  
12 routine activities (e.g., outdoor activities, regular exercise routines), as well as novel activities (e.g.,  
13 travel), that often served to distract them from using nicotine resulted in many participants turning to  
14 nicotine to help them pass the time. This finding is in line with other research identifying how nicotine  
15 use tends to increase when routines are disrupted, and boredom is resultantly increased [24-25].

16  
17  
18  
19  
20 In addition, the pandemic context is unique due to the addition of uncertainty to isolation. Some  
21 participants discussed not even knowing where they could go if they were to leave their house due to  
22 the nature of restrictions. Combining this with the global atmosphere of not knowing if and when the  
23 pandemic will end, this finding speaks to how nicotine users may have felt a loss of control over their  
24 lives, and as such over their abilities to maintain quit status, begin their quit journeys, and/or prevent  
25 relapse. As such, the ongoing impact of isolation as well as associated feelings of diminished control over  
26 outcomes cannot be underestimated, and our study findings foreground its role on tobacco use  
27 behaviors, which is largely negative.

28  
29  
30 It is also interesting that individuals spoke about continuing to smoke in order to go outside,  
31 versus going outside in order to smoke, as well as mentioned several unique motivators for doing so,  
32 such as encountering “Zoom-fatigue” as a result of educational and employment settings being shifted  
33 to remote formats. The pandemic appeared to create a shift in focus (being outside or getting away  
34 from screens rather than satisfying a craving) in relation to smoking. Having to go outside for a smoke  
35 has been previously perceived as a “hassle”, particularly after public smoke-free bans came into place  
36 [26]. However, going outside for a smoke during the pandemic appears to have shifted this perspective  
37 among some smokers, wherein smoking was perceived as something that enabled a needed respite  
38 from the monotony of being indoors. Public health measures would benefit from considering the nature  
39 of tobacco use when implementing stay at home orders, and particularly consider how removing the  
40 ability to leave one’s home – especially in the context of the pandemic-resultant rise in remote and  
41 hybrid work – can perpetuate health risk behaviors, like smoking. Given that distractions have been  
42 identified as a key affordance to quitting [27], ensuring that healthy distractions, for example games and  
43 opportunities for inter-user communication embedded within web- and app-based quit supports, are  
44 accessible and available during and after the pandemic is essential.

45  
46  
47  
48  
49  
50 Some individuals found pandemic isolation to make it easier to quit because there were fewer  
51 opportunities to experience social (“peer”) pressures around nicotine use; there were fewer parties and  
52 gatherings, and fewer opportunities to socialize with others who smoke/vape. On the other hand, living  
53 with other nicotine users and not being able to leave a shared environment due to lockdown measures  
54 proved a major barrier to quitting. Our findings corroborate existing studies that highlight how the  
55 opinions and behaviors of peers play a significant role in nicotine use maintenance [28]. However, as  
56  
57  
58  
59  
60

1  
2  
3 isolation and not seeing peers proved to be both a risk factor and a protective factor for increasing  
4 nicotine use, it is fundamental to note that that these findings are pertaining to exposure to social  
5 influences and contexts, and not social support. Social support is an integral element of cessation [29],  
6 and reduced connection with others due to the pandemic further highlights this. In this regard, and  
7 according to the findings, the pandemic increased the perception that enhancing social support in  
8 existing cessation supports should be prioritized, such as through forums, virtual and in-person support  
9 groups, coaching, and buddy systems, among others.  
10  
11

12 Although participants spoke about general pandemic-related stress and anxiety and their impact  
13 on increased use, many participants also discussed stress specifically associated with working from  
14 home, being laid off, or working in-person during the pandemic. Indeed, the pandemic introduced a  
15 myriad of sources of job-related stress, including layoffs, reduced income, reduced job security, and, for  
16 remote workers, a diminished ability to 'leave work at work' [30]. For in-person and essential workers,  
17 the pandemic led to lengthy work schedules, minimal time off, diminished time to engage in coping and  
18 stress-relieving strategies that hadn't yet been impacted by the pandemic, increased burnout, and  
19 increased susceptibility to the COVID-19 virus [31]. Previous literature has found that increased stress  
20 and anxiety about employment and finances is associated with greater nicotine consumption [32].  
21 Therefore, it makes sense why nicotine users smoked/vaped more to cope with pandemic-specific  
22 financial and employment stress and reveals how nicotine users are particularly vulnerable from a  
23 health risk perspective in the context of job loss, job instability, and burnout. Some nicotine users  
24 decided to quit or reduce use to save money in order to access protective factors such as travel  
25 (distractions), and visiting family (social support), emphasizing that the financial benefits of quitting may  
26 then be particularly relevant within a pandemic and post-pandemic context.  
27  
28  
29  
30

31 Finally, participants spoke of the traumatic stress of coping with pandemic-related deaths, and  
32 the lack of supports addressing COVID-specific traumas, which brings to light the need to incorporate  
33 both general and pandemic-related trauma into cessation supports that target mental health. It is well-  
34 established in the literature that most substance use, including nicotine use, tends to emerge as well as  
35 heighten when individuals experience trauma and feel unable to cope with it [33]. This further taps into  
36 the concept of nicotine users experiencing loss of control over life outcomes and subsequently  
37 succumbing to triggers and relapses. With almost 763 million deaths worldwide as a result of COVID-19,  
38 pandemic-related trauma continues to remain heavily significant and must be addressed by cessation  
39 supports through appropriate mental health resources, such as trauma-informed training for quit  
40 coaches, recommendations for virtual, 24/7 suicide-prevention services, and meaningful social supports  
41 [34].  
42  
43  
44  
45

46 Specific populations, such as Indigenous peoples, are overrepresented in facing heightened  
47 adversities, including those from COVID-19 [35]. Indeed, Indigenous participants described needing to  
48 work in-person during the pandemic, wanting to but being unable to see their families, and experiencing  
49 a greater amount of COVID-related trauma than others they knew. As such, cessation supports must  
50 provide unique, culturally responsive considerations for Indigenous nicotine users, for example by  
51 incorporating support and wisdom from Elders and bands, allowing for family and community  
52 engagement, engaging in traditional and ceremonial activities such as sweat lodges, providing support in  
53 the form of Indigenous quit coaches, and, finally, engaging Indigenous voices and individuals in  
54 developing these interventions [21].  
55  
56  
57  
58  
59  
60

1  
2  
3 In sum, the findings of this study indicate the need for interventions to incorporate elements  
4 addressing the unique susceptibilities experienced by users, such as the effects of isolation and stress, as  
5 these are states likely to persist beyond a pandemic context. Examples of these may include tools and  
6 strategies such as gamification to incorporate distractions, or tailored financial incentives. In addition,  
7 the findings emphasize the need to offer online and hybrid cessation services as well as novel modalities  
8 for information dissemination (e.g., Instagram and TikTok ads, Zoom groups, app-based cessation  
9 programs) as the literature has demonstrated that the pandemic caused significant drops in traditional,  
10 in-person cessation program enrolments [36-37]. By implementing participant suggestions, many  
11 barriers stated by individuals could potentially be eliminated or minimized. Finally, when developing  
12 new programs for cessation, we must also ensure that people who face greater systemic barriers, such  
13 as Indigenous and rural populations, can access these supports [38].  
14  
15  
16  
17  
18

### 19 **Strengths and Limitations**

20 This research has several limitations. First, interviews are subject to recall and social desirability  
21 biases. Second, as participants were solely from BC, Canada, participants' experiences may not be  
22 representative of experiences in a broader group of nicotine users. In addition, it must be noted that BC  
23 implemented pandemic response measures differentially from other provinces and countries, which  
24 may limit the transferability of the findings to individuals in areas where the response measures were  
25 different from that of BC. Third, since we did not directly ask questions about the COVID-19 pandemic,  
26 not all participants from the primary project provided their opinions. It is possible more participants  
27 would have provided in-depth information if intentional questions surrounding the pandemic had been  
28 incorporated into the original interviews. Fourth, due to our selection of keywords, it is possible some  
29 statements about COVID-19 and the pandemic could have been missed. Fifth, given that data were  
30 collected during a specific time period (May to August 2021), sociocultural and policy changes evolving  
31 with the pandemic may have continued to influence cessation needs beyond the scope of these findings.  
32 Finally, our sample may be unique in that participants may belong to a higher socioeconomic status than  
33 the general population of nicotine users worldwide as indicated by access to a desktop or mobile device  
34 and an Internet connection. Despite these limitations, this study has some noteworthy strengths. First,  
35 drawing secondary data from a very large primary study allowed for maximum variation across a range  
36 of sample characteristics, providing a rich dataset from which to develop themes. Next, our use of  
37 inductive qualitative methods enabled a detailed analytical approach. Finally, collecting rich interview  
38 data over months allowed us to capture nuanced, as well as consistent themes in the context of an ever-  
39 changing pandemic landscape in real time.  
40  
41  
42  
43  
44  
45

### 46 **CONCLUSIONS**

47  
48  
49 This qualitative study provides a snapshot into the lived experiences, needs, and desires of  
50 nicotine users motivated to quit during the COVID-19 pandemic. While isolation from the pandemic lent  
51 to some facilitators to quitting (e.g., reduced exposure to social pressures), participants reported a  
52 broader number of barriers to quitting associated with isolation. In addition, stress, especially financial  
53 stress, associated with the pandemic played a critical role in disrupting cessation efforts. Cessation  
54 programming would benefit from considering these unique impacts of the pandemic on cessation.  
55  
56  
57  
58  
59

## ACKNOWLEDGEMENTS

We thank all the individuals who reported their experiences quitting nicotine use. We also thank Shaheer Khan, Kyla Christianson, and Christine Yang who assisted with initial data collection and analysis.

## COMPETING INTERESTS STATEMENT

The authors have no conflicts of interest to declare.

## FUNDING STATEMENT

This work was supported by funding from the British Columbia Ministry of Health, via a BC Lung Foundation Research Agreement (grant#: #018471) and a Canadian Cancer Society Scholar Award (Prevention) (grant#: 707156).

## AUTHOR CONTRIBUTIONS

RS oversaw participant recruitment, data collection, interview transcription, primary data analysis, and conceptualization of the manuscript. LS, as senior author, conceptualized and designed the greater project and research protocol, and obtained research funding. DR led conduction of secondary data analysis. RS and DR jointly developed the manuscript, with LS overseeing and providing feedback on draft versions. All authors have seen and approved the final version.

## PATIENT CONSENT

As the present study involved secondary analysis of primary data, participant consent was not required as they had previously consented to the primary study.

## ETHICAL APPROVAL

Behavioral Research Ethics Board at the University of British Columbia's Okanagan campus (#H21-00145).

## DATA SHARING STATEMENT

Data for this study are de-identified participant data (qualitative interview transcripts) obtained for a primary study with informed consent provided by participants within the primary study. We have uploaded the semi-structured interview guide as a Supplementary File. To protect participant identities, we do not intend to share participant interview transcripts in a repository. Data reuse is not permitted without permission and consideration from the authors due to privacy. For all inquiries about data, please contact Ramona Sharma - ORCID: 0000-0001-5907-7035.

## REFERENCES

1. World Health Organization. Tobacco [Internet]. Who.int. World Health Organization: WHO; 2022. Available from: <https://www.who.int/news-room/fact-sheets/detail/tobacco>
2. Centers for Disease Control and Prevention. Smoking Cessation: Fast Facts [Internet]. CDC Tobacco Free. 2020 [cited 2022 Nov 3]. Available from: [https://www.cdc.gov/tobacco/data\\_statistics/fact\\_sheets/cessation/smoking-cessation-fast-facts/index.html](https://www.cdc.gov/tobacco/data_statistics/fact_sheets/cessation/smoking-cessation-fast-facts/index.html)
3. Castro Y, Heck K, Forster JL, Widome R, Cubbin C. Social and Environmental Factors Related to Smoking Cessation among Mothers: Findings from the Geographic Research on Wellbeing (GROW) Study. *American Journal of Health Behavior* [Internet]. 2015 Nov 1 [cited 2022 Nov 3];39(6):809–22. Available from: <https://www.ncbi.nlm.nih.gov/pmc/articles/PMC4603443/>
4. Statistics Canada. Canadian Tobacco and Nicotine Survey, 2021 [Internet]. www150.statcan.gc.ca. Government of Canada; 2022 [cited 2022 Nov 3]. Available from: <https://www150.statcan.gc.ca/n1/daily-quotidien/220505/dq220505c-eng.htm>
5. Statistics Canada. Canadian Tobacco and Nicotine Survey (CTNS): summary of results for 2019 [Internet]. www150.statcan.gc.ca. Government of Canada; 2020 [cited 2023 Apr 11]. Available from: <https://www.canada.ca/en/health-canada/services/canadian-tobacco-nicotine-survey/2019-summary.html>
6. Melamed OC, Zawertailo L, Schwartz R, Buckley L, Selby P. Commentary - Protecting vulnerable groups from tobacco-related harm during and following the COVID-19 pandemic. *Health Promotion and Chronic Disease Prevention in Canada* [Internet]. 2021 Jun [cited 2022 Nov 3];41(10). Available from: <https://www.canada.ca/en/public-health/services/reports-publications/health-promotion-chronic-disease-prevention-canada-research-policy-practice/vol-41-no-10-2021/protecting-vulnerable-groups-tobacco-harm-covid-19-pandemic.html>
7. Statistics Canada. StatCan COVID-19: Data to Insights for a Better Canada [Internet]. StatCan COVID-19: Data to Insights for a Better Canada. Government of Canada; 2022 [cited 2022 Nov 2]. Available from: <https://www150.statcan.gc.ca/n1/en/catalogue/45280001>
8. Statistics Canada. Canadian Tobacco and Nicotine Survey, 2020 [Internet]. www150.statcan.gc.ca. Government of Canada; 2021 [cited 2022 Nov 3]. Available from: <https://www150.statcan.gc.ca/n1/daily-quotidien/210317/dq210317b-eng.htm>
9. Kayhan Tetik B, Gedik Tekinemre I, Taş S. The Effect of the COVID-19 Pandemic on Smoking Cessation Success. *Journal of Community Health* [Internet]. 2020 Jul 8 [cited 2021 Mar 21];46(3). Available from: <https://www.ncbi.nlm.nih.gov/pmc/articles/PMC7340767/>
10. Gentzke AS, Wang TW, Cornelius M, Park-Lee E, Ren C, Sawdey MD et al. Tobacco Product Use and Associated Factors Among Middle and High School Students — National Youth Tobacco Survey, United States, 2021. *MMWR CDC Surveill Summ* [Internet]. 2022 Mar 11 [cited 2023 Apr 11];71(5). Available from: <https://www.cdc.gov/mmwr/volumes/71/ss/pdfs/ss7105a1-H.pdf>
11. Wang TW, Gentzke AS, Creamer MR, Cullen KA, Holder-Hayes E, Sawdey MD et al. Tobacco Product Use and Associated Factors Among Middle and High School Students — United States, 2019. *MMWR CDC Surveill Summ* [Internet]. 2019 Dec 6 [cited 2023 Apr 11];68(12). Available from: [https://www.hawaiihealthmatters.org/content/sites/hawaii/NYTS\\_from\\_MMWR\\_2019.pdf](https://www.hawaiihealthmatters.org/content/sites/hawaii/NYTS_from_MMWR_2019.pdf)
12. Kopelovich SL, Monroe-DeVita M, Buck BE, Brenner C, Moser L, Jarskog LF, et al. Community Mental Health Care Delivery During the COVID-19 Pandemic: Practical Strategies for Improving Care for People with Serious Mental Illness. *Community Mental Health Journal* [Internet]. 2020

- 1  
2  
3 Jun 19 [cited 2022 Nov 3];57(3). Available from:  
4 <https://www.ncbi.nlm.nih.gov/pmc/articles/PMC7304659/>  
5  
6 13. Bommelé J, Walters BH, Willemsen M. Smoking in the Netherlands: Key Statistics for 2021.  
7 Utrecht: Trimbos-instituut; 2022 Jun. Report No.: AF1999. Available from:  
8 [https://www.trimbos.nl/wp-content/uploads/2022/06/AF1999-Smoking-in-the-Netherlands-](https://www.trimbos.nl/wp-content/uploads/2022/06/AF1999-Smoking-in-the-Netherlands-Key-statistics-for-2021.pdf)  
9 [Key-statistics-for-2021.pdf](https://www.trimbos.nl/wp-content/uploads/2022/06/AF1999-Smoking-in-the-Netherlands-Key-statistics-for-2021.pdf)  
10  
11 14. Bommelé J, Walters BH, Willemsen M. Smoking in the Netherlands: Key Statistics for 2019.  
12 Utrecht: Trimbos-instituut; 2020 Jul. Report No.: AF1792. Available from:  
13 [https://www.trimbos.nl/wp-content/uploads/sites/31/2021/09/af1792-smoking-in-the-](https://www.trimbos.nl/wp-content/uploads/sites/31/2021/09/af1792-smoking-in-the-netherlands-key-statistics-2019.pdf)  
14 [netherlands-key-statistics-2019.pdf](https://www.trimbos.nl/wp-content/uploads/sites/31/2021/09/af1792-smoking-in-the-netherlands-key-statistics-2019.pdf)  
15  
16 15. New Zealand Ministry of Health. Annual Update of Key Results 2020/21: New Zealand Health  
17 Survey [Internet]. Ministry of Health – Manatū Hauora; 2021 Dec 1 [2022 Nov 18; cited 2023 Apr  
18 11]. Available from: [https://www.health.govt.nz/publication/annual-update-key-results-2020-](https://www.health.govt.nz/publication/annual-update-key-results-2020-21-new-zealand-health-survey)  
19 [21-new-zealand-health-survey](https://www.health.govt.nz/publication/annual-update-key-results-2020-21-new-zealand-health-survey)  
20  
21 16. Birtwistle S, Deakin E, Whitford R, Hinchliffe S, Daniels-Creasey A, Rule S et al. The Scottish  
22 Health Survey 2021 – volume 1: main report. Scottish Government; 2022 Nov. Report  
23 No.: 9781805251514. Available from: [https://www.gov.scot/publications/scottish-health-](https://www.gov.scot/publications/scottish-health-survey-2021-volume-1-main-report/)  
24 [survey-2021-volume-1-main-report/](https://www.gov.scot/publications/scottish-health-survey-2021-volume-1-main-report/)  
25  
26 17. Biggs H, Christie S, Wilson V, Elliott C, Shields J, Vosnaki K et al. Scottish Health Survey 2019 –  
27 volume 1: main report. Scottish Government; 2020 Sept. Report No.: 9781800040465. Available  
28 from:  
29 [https://www.gov.scot/binaries/content/documents/govscot/publications/statistics/2020/09/sc-](https://www.gov.scot/binaries/content/documents/govscot/publications/statistics/2020/09/scottish-health-survey-2019-volume-1-main-report/documents/scottish-health-survey-2019-edition-volume-1-main-report/scottish-health-survey-2019-edition-volume-1-main-report/govscot%3Adocument/scottish-health-survey-2019-edition-volume-1-main-report.pdf)  
30 [ottish-health-survey-2019-volume-1-main-report/documents/scottish-health-survey-2019-](https://www.gov.scot/binaries/content/documents/govscot/publications/statistics/2020/09/scottish-health-survey-2019-volume-1-main-report/documents/scottish-health-survey-2019-edition-volume-1-main-report/scottish-health-survey-2019-edition-volume-1-main-report/govscot%3Adocument/scottish-health-survey-2019-edition-volume-1-main-report.pdf)  
31 [edition-volume-1-main-report/scottish-health-survey-2019-edition-volume-1-main-](https://www.gov.scot/binaries/content/documents/govscot/publications/statistics/2020/09/scottish-health-survey-2019-volume-1-main-report/documents/scottish-health-survey-2019-edition-volume-1-main-report/scottish-health-survey-2019-edition-volume-1-main-report/govscot%3Adocument/scottish-health-survey-2019-edition-volume-1-main-report.pdf)  
32 [report/govscot%3Adocument/scottish-health-survey-2019-edition-volume-1-main-](https://www.gov.scot/binaries/content/documents/govscot/publications/statistics/2020/09/scottish-health-survey-2019-volume-1-main-report/documents/scottish-health-survey-2019-edition-volume-1-main-report/scottish-health-survey-2019-edition-volume-1-main-report/govscot%3Adocument/scottish-health-survey-2019-edition-volume-1-main-report.pdf)  
33 [report/scottish-health-survey-2019-edition-volume-1-main-](https://www.gov.scot/binaries/content/documents/govscot/publications/statistics/2020/09/scottish-health-survey-2019-volume-1-main-report/documents/scottish-health-survey-2019-edition-volume-1-main-report/scottish-health-survey-2019-edition-volume-1-main-report/govscot%3Adocument/scottish-health-survey-2019-edition-volume-1-main-report.pdf)  
34 [report/govscot%3Adocument/scottish-health-survey-2019-edition-volume-1-main-](https://www.gov.scot/binaries/content/documents/govscot/publications/statistics/2020/09/scottish-health-survey-2019-volume-1-main-report/documents/scottish-health-survey-2019-edition-volume-1-main-report/scottish-health-survey-2019-edition-volume-1-main-report/govscot%3Adocument/scottish-health-survey-2019-edition-volume-1-main-report.pdf)  
35 [report/scottish-health-survey-2019-edition-volume-1-main-](https://www.gov.scot/binaries/content/documents/govscot/publications/statistics/2020/09/scottish-health-survey-2019-volume-1-main-report/documents/scottish-health-survey-2019-edition-volume-1-main-report/scottish-health-survey-2019-edition-volume-1-main-report/govscot%3Adocument/scottish-health-survey-2019-edition-volume-1-main-report.pdf)  
36 [report/govscot%3Adocument/scottish-health-survey-2019-edition-volume-1-main-](https://www.gov.scot/binaries/content/documents/govscot/publications/statistics/2020/09/scottish-health-survey-2019-volume-1-main-report/documents/scottish-health-survey-2019-edition-volume-1-main-report/scottish-health-survey-2019-edition-volume-1-main-report/govscot%3Adocument/scottish-health-survey-2019-edition-volume-1-main-report.pdf)  
37 [report/govscot%3Adocument/scottish-health-survey-2019-edition-volume-1-main-](https://www.gov.scot/binaries/content/documents/govscot/publications/statistics/2020/09/scottish-health-survey-2019-volume-1-main-report/documents/scottish-health-survey-2019-edition-volume-1-main-report/scottish-health-survey-2019-edition-volume-1-main-report/govscot%3Adocument/scottish-health-survey-2019-edition-volume-1-main-report.pdf)  
38 [report/govscot%3Adocument/scottish-health-survey-2019-edition-volume-1-main-](https://www.gov.scot/binaries/content/documents/govscot/publications/statistics/2020/09/scottish-health-survey-2019-volume-1-main-report/documents/scottish-health-survey-2019-edition-volume-1-main-report/scottish-health-survey-2019-edition-volume-1-main-report/govscot%3Adocument/scottish-health-survey-2019-edition-volume-1-main-report.pdf)  
39 [report/govscot%3Adocument/scottish-health-survey-2019-edition-volume-1-main-](https://www.gov.scot/binaries/content/documents/govscot/publications/statistics/2020/09/scottish-health-survey-2019-volume-1-main-report/documents/scottish-health-survey-2019-edition-volume-1-main-report/scottish-health-survey-2019-edition-volume-1-main-report/govscot%3Adocument/scottish-health-survey-2019-edition-volume-1-main-report.pdf)  
40 [report/govscot%3Adocument/scottish-health-survey-2019-edition-volume-1-main-](https://www.gov.scot/binaries/content/documents/govscot/publications/statistics/2020/09/scottish-health-survey-2019-volume-1-main-report/documents/scottish-health-survey-2019-edition-volume-1-main-report/scottish-health-survey-2019-edition-volume-1-main-report/govscot%3Adocument/scottish-health-survey-2019-edition-volume-1-main-report.pdf)  
41 [report/govscot%3Adocument/scottish-health-survey-2019-edition-volume-1-main-](https://www.gov.scot/binaries/content/documents/govscot/publications/statistics/2020/09/scottish-health-survey-2019-volume-1-main-report/documents/scottish-health-survey-2019-edition-volume-1-main-report/scottish-health-survey-2019-edition-volume-1-main-report/govscot%3Adocument/scottish-health-survey-2019-edition-volume-1-main-report.pdf)  
42 [report/govscot%3Adocument/scottish-health-survey-2019-edition-volume-1-main-](https://www.gov.scot/binaries/content/documents/govscot/publications/statistics/2020/09/scottish-health-survey-2019-volume-1-main-report/documents/scottish-health-survey-2019-edition-volume-1-main-report/scottish-health-survey-2019-edition-volume-1-main-report/govscot%3Adocument/scottish-health-survey-2019-edition-volume-1-main-report.pdf)  
43 [report/govscot%3Adocument/scottish-health-survey-2019-edition-volume-1-main-](https://www.gov.scot/binaries/content/documents/govscot/publications/statistics/2020/09/scottish-health-survey-2019-volume-1-main-report/documents/scottish-health-survey-2019-edition-volume-1-main-report/scottish-health-survey-2019-edition-volume-1-main-report/govscot%3Adocument/scottish-health-survey-2019-edition-volume-1-main-report.pdf)  
44 [report/govscot%3Adocument/scottish-health-survey-2019-edition-volume-1-main-](https://www.gov.scot/binaries/content/documents/govscot/publications/statistics/2020/09/scottish-health-survey-2019-volume-1-main-report/documents/scottish-health-survey-2019-edition-volume-1-main-report/scottish-health-survey-2019-edition-volume-1-main-report/govscot%3Adocument/scottish-health-survey-2019-edition-volume-1-main-report.pdf)  
45 [report/govscot%3Adocument/scottish-health-survey-2019-edition-volume-1-main-](https://www.gov.scot/binaries/content/documents/govscot/publications/statistics/2020/09/scottish-health-survey-2019-volume-1-main-report/documents/scottish-health-survey-2019-edition-volume-1-main-report/scottish-health-survey-2019-edition-volume-1-main-report/govscot%3Adocument/scottish-health-survey-2019-edition-volume-1-main-report.pdf)  
46 [report/govscot%3Adocument/scottish-health-survey-2019-edition-volume-1-main-](https://www.gov.scot/binaries/content/documents/govscot/publications/statistics/2020/09/scottish-health-survey-2019-volume-1-main-report/documents/scottish-health-survey-2019-edition-volume-1-main-report/scottish-health-survey-2019-edition-volume-1-main-report/govscot%3Adocument/scottish-health-survey-2019-edition-volume-1-main-report.pdf)  
47 [report/govscot%3Adocument/scottish-health-survey-2019-edition-volume-1-main-](https://www.gov.scot/binaries/content/documents/govscot/publications/statistics/2020/09/scottish-health-survey-2019-volume-1-main-report/documents/scottish-health-survey-2019-edition-volume-1-main-report/scottish-health-survey-2019-edition-volume-1-main-report/govscot%3Adocument/scottish-health-survey-2019-edition-volume-1-main-report.pdf)  
48 [report/govscot%3Adocument/scottish-health-survey-2019-edition-volume-1-main-](https://www.gov.scot/binaries/content/documents/govscot/publications/statistics/2020/09/scottish-health-survey-2019-volume-1-main-report/documents/scottish-health-survey-2019-edition-volume-1-main-report/scottish-health-survey-2019-edition-volume-1-main-report/govscot%3Adocument/scottish-health-survey-2019-edition-volume-1-main-report.pdf)  
49 [report/govscot%3Adocument/scottish-health-survey-2019-edition-volume-1-main-](https://www.gov.scot/binaries/content/documents/govscot/publications/statistics/2020/09/scottish-health-survey-2019-volume-1-main-report/documents/scottish-health-survey-2019-edition-volume-1-main-report/scottish-health-survey-2019-edition-volume-1-main-report/govscot%3Adocument/scottish-health-survey-2019-edition-volume-1-main-report.pdf)  
50 [report/govscot%3Adocument/scottish-health-survey-2019-edition-volume-1-main-](https://www.gov.scot/binaries/content/documents/govscot/publications/statistics/2020/09/scottish-health-survey-2019-volume-1-main-report/documents/scottish-health-survey-2019-edition-volume-1-main-report/scottish-health-survey-2019-edition-volume-1-main-report/govscot%3Adocument/scottish-health-survey-2019-edition-volume-1-main-report.pdf)  
51 [report/govscot%3Adocument/scottish-health-survey-2019-edition-volume-1-main-](https://www.gov.scot/binaries/content/documents/govscot/publications/statistics/2020/09/scottish-health-survey-2019-volume-1-main-report/documents/scottish-health-survey-2019-edition-volume-1-main-report/scottish-health-survey-2019-edition-volume-1-main-report/govscot%3Adocument/scottish-health-survey-2019-edition-volume-1-main-report.pdf)  
52 [report/govscot%3Adocument/scottish-health-survey-2019-edition-volume-1-main-](https://www.gov.scot/binaries/content/documents/govscot/publications/statistics/2020/09/scottish-health-survey-2019-volume-1-main-report/documents/scottish-health-survey-2019-edition-volume-1-main-report/scottish-health-survey-2019-edition-volume-1-main-report/govscot%3Adocument/scottish-health-survey-2019-edition-volume-1-main-report.pdf)  
53 [report/govscot%3Adocument/scottish-health-survey-2019-edition-volume-1-main-](https://www.gov.scot/binaries/content/documents/govscot/publications/statistics/2020/09/scottish-health-survey-2019-volume-1-main-report/documents/scottish-health-survey-2019-edition-volume-1-main-report/scottish-health-survey-2019-edition-volume-1-main-report/govscot%3Adocument/scottish-health-survey-2019-edition-volume-1-main-report.pdf)  
54 [report/govscot%3Adocument/scottish-health-survey-2019-edition-volume-1-main-](https://www.gov.scot/binaries/content/documents/govscot/publications/statistics/2020/09/scottish-health-survey-2019-volume-1-main-report/documents/scottish-health-survey-2019-edition-volume-1-main-report/scottish-health-survey-2019-edition-volume-1-main-report/govscot%3Adocument/scottish-health-survey-2019-edition-volume-1-main-report.pdf)  
55 [report/govscot%3Adocument/scottish-health-survey-2019-edition-volume-1-main-](https://www.gov.scot/binaries/content/documents/govscot/publications/statistics/2020/09/scottish-health-survey-2019-volume-1-main-report/documents/scottish-health-survey-2019-edition-volume-1-main-report/scottish-health-survey-2019-edition-volume-1-main-report/govscot%3Adocument/scottish-health-survey-2019-edition-volume-1-main-report.pdf)  
56 [report/govscot%3Adocument/scottish-health-survey-2019-edition-volume-1-main-](https://www.gov.scot/binaries/content/documents/govscot/publications/statistics/2020/09/scottish-health-survey-2019-volume-1-main-report/documents/scottish-health-survey-2019-edition-volume-1-main-report/scottish-health-survey-2019-edition-volume-1-main-report/govscot%3Adocument/scottish-health-survey-2019-edition-volume-1-main-report.pdf)  
57 [report/govscot%3Adocument/scottish-health-survey-2019-edition-volume-1-main-](https://www.gov.scot/binaries/content/documents/govscot/publications/statistics/2020/09/scottish-health-survey-2019-volume-1-main-report/documents/scottish-health-survey-2019-edition-volume-1-main-report/scottish-health-survey-2019-edition-volume-1-main-report/govscot%3Adocument/scottish-health-survey-2019-edition-volume-1-main-report.pdf)  
58 [report/govscot%3Adocument/scottish-health-survey-2019-edition-volume-1-main-](https://www.gov.scot/binaries/content/documents/govscot/publications/statistics/2020/09/scottish-health-survey-2019-volume-1-main-report/documents/scottish-health-survey-2019-edition-volume-1-main-report/scottish-health-survey-2019-edition-volume-1-main-report/govscot%3Adocument/scottish-health-survey-2019-edition-volume-1-main-report.pdf)  
59 [report/govscot%3Adocument/scottish-health-survey-2019-edition-volume-1-main-](https://www.gov.scot/binaries/content/documents/govscot/publications/statistics/2020/09/scottish-health-survey-2019-volume-1-main-report/documents/scottish-health-survey-2019-edition-volume-1-main-report/scottish-health-survey-2019-edition-volume-1-main-report/govscot%3Adocument/scottish-health-survey-2019-edition-volume-1-main-report.pdf)  
60 [report/govscot%3Adocument/scottish-health-survey-2019-edition-volume-1-main-](https://www.gov.scot/binaries/content/documents/govscot/publications/statistics/2020/09/scottish-health-survey-2019-volume-1-main-report/documents/scottish-health-survey-2019-edition-volume-1-main-report/scottish-health-survey-2019-edition-volume-1-main-report/govscot%3Adocument/scottish-health-survey-2019-edition-volume-1-main-report.pdf)
20. Heaton J. Reworking qualitative data. London; Thousand Oaks, California: Sage; 2004.
21. Struik LL, Werstuik S-T, Sundstrom A, Dow-Fleisner S, Ben-David S. Factors that influence the  
decision to vape among Indigenous youth. BMC Public Health. 2022;22(1). Available from:  
<https://bmcpublikealth.biomedcentral.com/articles/10.1186/s12889-022-13095-y>
22. Canadian Institute for Health Information. COVID-19 Intervention Timeline in Canada: Data  
Tables Ottawa, ON; 2021. Available from: [https://www.cihi.ca/en/canadian-covid-19-](https://www.cihi.ca/en/canadian-covid-19-intervention-timeline)  
[intervention-timeline](https://www.cihi.ca/en/canadian-covid-19-intervention-timeline)
23. Statistics Canada. Alcohol and cannabis use during the pandemic: Canadian Perspectives Survey  
Series 6 [Internet]. www150.statcan.gc.ca. Government of Canada; 2021 [cited 2022 Nov 3].  
Available from: <https://www150.statcan.gc.ca/n1/daily-quotidien/210304/dq210304a-eng.htm>
24. Gonzalez M, Epperson AE, Halpern-Felsher B, Halliday DM, Song AV. Smokers Are More Likely to  
Smoke More after the COVID-19 California Lockdown Order. International Journal of  
Environmental Research and Public Health [Internet]. 2021 Mar 5 [cited 2022 Nov 3];18(5):2582.  
Available from: <https://www.ncbi.nlm.nih.gov/pmc/articles/PMC7967350/>



- 1
  - 2
  - 3
  - 4
  - 5
  - 6
  - 7
  - 8
  - 9
  - 10
  - 11
  - 12
  - 13
  - 14
  - 15
  - 16
  - 17
  - 18
  - 19
  - 20
  - 21
  - 22
  - 23
  - 24
  - 25
  - 26
  - 27
  - 28
  - 29
  - 30
  - 31
  - 32
  - 33
  - 34
  - 35
  - 36
  - 37
  - 38
  - 39
  - 40
  - 41
  - 42
  - 43
  - 44
  - 45
  - 46
  - 47
  - 48
  - 49
  - 50
  - 51
  - 52
  - 53
  - 54
  - 55
  - 56
  - 57
  - 58
  - 59
  - 60
25. Smith B, Lim M. How the COVID-19 pandemic is focusing attention on loneliness and social isolation. *Public Health Research & Practice* [Internet]. 2020 [cited 2022 Nov 3];30(2). Available from: <https://pdfs.semanticscholar.org/d4b8/7055101c6b3988c43eb3a53f59b8be68e986.pdf>
26. Ritchie D, Amos A, Martin C. Public places after smoke-free—A qualitative exploration of the changes in smoking behaviour. *Health & Place* [Internet]. 2010 May [cited 2022 Nov 3];16(3):461–9. Available from: <https://www.sciencedirect.com/science/article/abs/pii/S1353829209001476>
27. Struik LL, Bottorff JL, Baskerville NB, Oliffe JL. The Crush the Crave Quit Smoking App and Young Adult Smokers: Qualitative Case Study of Affordances. *JMIR mHealth and uHealth* [Internet]. 2018 Jun 8 [cited 2022 Nov 3];6(6):e9489. Available from: <https://mhealth.jmir.org/2018/6/e134/>
28. Soulakova JN, Tang C-Y, Leonardo SA, Taliaferro LA. Motivational Benefits of Social Support and Behavioural Interventions for Smoking Cessation. *Journal of Smoking Cessation* [Internet]. 2018 Jan 21 [cited 2022 Nov 3];13(4):216–26. Available from: <https://www.ncbi.nlm.nih.gov/pmc/articles/PMC6459678/>
29. Murray RP, Johnston JJ, Dolce JJ, Lee WW, O'Hara P. Social support for smoking cessation and abstinence: The lung health study. *Addictive Behaviors* [Internet]. 2000 Jul 24 [cited 2023 Apr 11];20(2):159-170. Available from: <https://www.sciencedirect.com/science/article/pii/S030646039980001X>
30. World Health Organization. COVID-19 pandemic triggers 25% increase in prevalence of anxiety and depression worldwide [Internet]. *News. World Health Organization*; 2022 [cited 2022 Nov 3]. Available from: <https://www.who.int/news/item/02-03-2022-covid-19-pandemic-triggers-25-increase-in-prevalence-of-anxiety-and-depression-worldwide>
31. Chan XW, Shang S, Brough P, Wilkinson A, Lu C. Work, life and COVID-19: A Rapid Review and practical recommendations for the post-pandemic workplace. *Asia Pacific Journal of Human Resources*. 2022;61(2):257–76. Available from: <https://doi.org/10.1111/1744-7941.12355>
32. Kalkhoran SM, Levy DE, Rigotti NA. Smoking and E-Cigarette Use Among U.S. Adults During the COVID-19 Pandemic. *American Journal of Preventive Medicine* [Internet]. 2021 Oct [cited 2022 Nov 3];62(3). Available from: <https://doi.org/10.1016/j.amepre.2021.08.018>
33. Feldner M, Babson K, Zvolensky M. Smoking, traumatic event exposure, and post-traumatic stress: A critical review of the empirical literature☆. *Clinical Psychology Review*. 2007;27(1):14–45. Available from: <https://doi.org/10.1016/j.cpr.2006.08.004>
34. WHO coronavirus (COVID-19) dashboard [Internet]. *World Health Organization*; [cited 2023Apr16]. Available from: <https://covid19.who.int/>
35. Covid-19 and Indigenous Peoples [Internet]. *United Nations. United Nations*; [cited 2023Apr16]. Available from: <https://www.un.org/development/desa/indigenouspeoples/covid-19.html>
36. Ahluwalia IB, Myers M, Cohen JE. COVID-19 pandemic: an opportunity for tobacco use cessation. *The Lancet Public Health* [Internet]. 2020 Nov 1 [cited 2022 Nov 3];5(11):e577. Available from: [https://www.thelancet.com/journals/lanpub/article/PIIS2468-2667\(20\)30236-X/fulltext](https://www.thelancet.com/journals/lanpub/article/PIIS2468-2667(20)30236-X/fulltext)
37. Elling J, Crutzen R, Talhout R, De Vries H. Tobacco smoking and smoking cessation in times of COVID-19. *Tobacco Prevention & Cessation* [Internet]. 2020 Jul 1 [cited 2020 Aug 2];6(July). Available from: <https://www.ncbi.nlm.nih.gov/pmc/articles/PMC7549523/>
38. Minian N, Veldhuizen S, Tanzini E, Duench S, deRuiter WK, Barker M, et al. Changes in the reach of a smoking cessation program in Ontario, Canada, during the COVID-19 pandemic: a cross-sectional study. *Canadian Medical Association Open Access Journal* [Internet]. 2021 Oct 1 [cited 2022 Nov 3];9(4):E957–65. Available from: <https://www.cmajopen.ca/content/9/4/E957>

1  
2  
3  
4  
5  
6  
7  
8  
9  
10  
11  
12  
13  
14  
15  
16  
17  
18  
19  
20  
21  
22  
23  
24  
25  
26  
27  
28  
29  
30  
31  
32  
33  
34  
35  
36  
37  
38  
39  
40  
41  
42  
43  
44  
45  
46  
47  
48  
49  
50  
51  
52  
53  
54  
55  
56  
57  
58  
59  
60

For peer review only



## QUITNOW RESEARCH STUDY PROTOCOL

### INTERVIEW GUIDE FOR NON-INDIGENOUS CURRENT QUITNOW USERS

#### Preparation (using Zoom for interviews)

1. AV check
2. Recording ready (recording app on phone)
3. Materials for sharing uploaded (questionnaire, interview guide, consent form)
4. Facilitator notes
5. Ensure consent for all participants has been received
6. Make sure phone calls are blocked from phone

#### NOTE:

- Try your best to interview the participant as close to 1 hour as you can
  - Take your time – if you are not rushed, then participants will feel less rushed to answer your questions
  - Pause for a few seconds after participants answer – this will prompt participants to add more to their answer. Saying something like “*mhm...*” after they answer as if you are expecting them to say more.
  - Encourage participants to take their time with their responses.
- Encourage creative thinking
  - Do not limit participants with what they believe is possible. People do their best creative thinking when they do not think about practical constraints.
- Try to ask as many open-ended (vs. Closed-ended) questions as possible
  - Example of a closed-ended question: *Do you like that?*
  - Example of an open-ended question: *What do you like about that?*
- Phrases you can use to prompt participants to talk more:
  - *Tell me more about \_\_\_\_.*
  - *How can you see \_\_\_\_ being incorporated into the website?*
  - *How can you see \_\_\_\_ (flaw of the website) \_\_\_\_ being fixed?*
  - *What else?*
- Responses to difficult answers:
  - Participant: there’s nothing I don’t like about it! It’s great!
    - Answer: “*What’s so great about it?*”
    - Answer: “*What can make it better?*”
    - Answer: “*I’m glad you like it so much! We’re also interested in what you don’t like about the website, as insignificant as it may be – where do you think the website can improve?*”
    - Answer: “*On a scale of 1-10, how confident do you think this website will be in helping you quit?*” - if below 10, ask “*how could the website be changed so that your answer is 10?*”



### Welcome/Instructions for Facilitators (5 minutes)

1. Hello, thank you for taking the time
2. Introduce yourself
3. Questionnaire – thank them for completing it
  - o \*If they haven't had a chance to do it, screen share the questionnaire and complete it with them.
4. Purpose of the study: to invite BC residents to provide their input of the smoking cessation service, QuitNow.
5. Consent – ongoing process (can discontinue at any point)
6. Questions?
7. Interview is being recorded – is that okay? \*start recording\*
8. Acknowledge that this research is taking place on the unceded territory of the Syilx/Okanagan people.
9. Remind participants that we are not QuitNow employees and that they can share any type of feedback.
10. Encourage participants to open up the website while they are conducting the interview

### QuitNow Questions (~30 minutes)

*We are now going to ask you to walk through the QuitNow website and talk about what aspects of it worked well and which ones did not. So, to start...*

1. Do you/have you used QuitNow on your mobile device and/or laptop?
2. How did you hear about QuitNow?
3. How have you used QuitNow to help you quit?
4. Why did you start using QuitNow? What kept you coming back? OR Why did you not use it/stop using it?
5. What about QuitNow do you like the most?
  - a. Which aspects do you use the most?
  - b. How did (said aspects) help you in reaching your goals of reducing or quitting?
  - c. Can you tell me about a time when (said aspect) helped you?
  - d. How could this aspect be improved/even better?
6. What about QuitNow do you not like?
  - a. What were its limitations in relation to your efforts to reduce/quit?
  - b. What were you hoping for instead?
  - c. How could this limitation be addressed (e.g., should it be removed, or could it be improved)?
7. How would you like to receive support on QuitNow?
8. Would you want the QuitNow forum to have discussion threads?
  - a. If you were at week 1, would you want to hear about what others did during week 12?
  - b. Alternatively, would you like to see threads based on themes (e.g., struggles, successes, triggers, motivations, etc.)?
  - c. Or do you prefer to just have an open forum?
9. What types of information would you like to see on QuitNow (e.g., benefits of quitting, consequences of not quitting, stories from others, tips to stay nicotine-free, suggestions for distractions, what to expect, etc.)?
10. What do you think of incorporating support for quitting e-cigarettes on QuitNow?



- a. How should it be different to cigarette cessation support?
- b. How should it be similar?
11. What additional features would you like to see on QuitNow?
12. Do you have any suggestions for improving the look and feel of QuitNow?
13. Would you recommend QuitNow to your friends/family? Why or why not?
14. How could we get the word out that QuitNow exists?
15. What might be some barriers (e.g., stress, friends or family who smoke)? How could/should these be mitigated by QuitNow?
16. Outside of QuitNow, what are other aspects of your life that help facilitate reducing/quitting (e.g., social support, willpower, etc.)? How could/should these be incorporated into QuitNow?
17. For current QuitNow users: You have told me that you have [reduced/quit/no change in] smoking since you were first introduced to QuitNow. What do you think has been the biggest influencing factor? Overall, how helpful has QuitNow been to you?
18. Thinking about what we have talked about so far, if you could provide the developers of QuitNow with some advice, what would it be?
19. If you could have anything you wanted (i.e., in an ideal world), what would you want QuitNow have/do for you?
20. If we were to do a follow up study with a focus group, would you be interested in taking part in that? We will contact you if we do this.
21. Would you like to receive the results of the study once it is published?

#### **Closing: final comments (5 minutes)**

Thank you for joining me today and helping us understand more about what we can do to improve BC's largest smoking cessation service. This will help us to tailor the website so that it is better able to meet the needs of BC residents who are trying to quit smoking or vaping. We are at the end of this session but before we leave, do you have any final thoughts that you would like to share?

- Which vendor would you like to receive your \$50 honorarium for?
- Would you live to be contacted to participate in a follow-up study?
- Would you like to receive the results of the study once they are published?

#### **After the Interview**

1. Update spreadsheet (OneDrive):
  - a. Ensure participant information is updated (i.e., smoke status, vape status, QuitNow user, age, gender, consent, questionnaire, interview, honorarium, agree to follow-up contact, would like to receive the results of the study)
  - b. Record if they would like to participate in a follow up focus group
  - c. Record if they would like to receive results of the study
2. Upload to OneDrive
  - a. Recording
  - b. Questionnaire
3. **\*\*Ensure files are labelled with participant ID, gender, and QuitNow status \*\***
  - a. E.g., "#23, M, Y" for participant number 23, male, QuitNow user (Y)
  - b. E.g., "#23, F, N" for participant number 23, female, QuitNow non-user



## INTERVIEW GUIDE FOR NON-INDIGENOUS POTENTIAL QUITNOW USERS

### Preparation (using Zoom for interviews)

1. AV check
2. Recording ready (recording app on phone)
3. Materials for sharing uploaded (questionnaire, interview guide, consent form)
4. Facilitator notes
5. Ensure consent for all participants has been received
6. Make sure phone calls are blocked from phone

### NOTE:

- Try your best to interview the participant as close to 1 hour as you can
  - Take your time – if you are not rushed, then participants will feel less rushed to answer your questions
  - Pause for a few seconds after participants answer – this will prompt participants to add more to their answer. Saying something like “*mhm...*” after they answer as if you are expecting them to say more.
  - Encourage participants to take their time with their responses.
- Encourage creative thinking
  - Do not limit participants with what they believe is possible. People do their best creative thinking when they do not think about practical constraints.
- Try to ask as many open-ended (vs. Closed-ended) questions as possible
  - Example of a closed-ended question: *Do you like that?*
  - Example of an open-ended question: *What do you like about that?*
- Phrases you can use to prompt participants to talk more:
  - *Tell me more about \_\_\_\_.*
  - *How can you see \_\_\_\_ being incorporated into the website?*
  - *How can you see \_\_\_\_ (flaw of the website) \_\_\_\_ being fixed?*
  - *What else?*
- Responses to difficult answers:
  - Participant: there’s nothing I don’t like about it! It’s great!
    - Answer: “*What’s so great about it?*”
    - Answer: “*What can make it better?*”
    - Answer: “*I’m glad you like it so much! We’re also interested in what you don’t like about the website, as insignificant as it may be – where do you think the website can improve?*”

Answer: “*On a scale of 1-10, how confident do you think this website will be in helping you quit?*” - if below 10, ask “*how could the website be changed so that your answer is 10?*”

### Welcome/Instructions for Facilitators (5 minutes)

1. Hello, thank you for taking the time
2. Introduce yourself
3. Questionnaire – thank them for completing it



- 1
- 2
- 3
- 4 ○ \*If they haven't had a chance to do it, screen share the questionnaire and complete it with them.
- 5
- 6 4. Purpose of the study: to invite BC residents to provide their input of the smoking cessation service, QuitNow.
- 7
- 8 5. Consent – ongoing process (can discontinue at any point)
- 9
- 10 6. Questions?
- 11 7. Interview is being recorded – is that okay? \*start recording\*
- 12 8. Acknowledge that this research is taking place on the unceded territory of the Syilx/Okanagan people.
- 13
- 14 9. Remind participants that we are not QuitNow employees and that they can share any type of feedback.
- 15
- 16
- 17 10. Encourage participants to open up the website while they are conducting the interview
- 18
- 19

### QuitNow Questions (~30 minutes)

*Before this interview, you were asked to take a look at the QuitNow website, so I want to now hear about your reactions to the website and what it currently offers.*

1. Let's start with the overall look and feel.
  - a. What is your initial reaction?
  - b. How could it be improved?
2. What aspects of the website did you like?
  - a. What would you find helpful in quitting smoking?
  - b. What would keep you coming back?
3. What did you not like?
  - a. What are the major limitations of the site?
  - b. What makes you not want to come back to it?
4. How would you like to receive support on QuitNow?
5. Would you want the QuitNow forum to have discussion threads?
  - a. If you were at week 1, would you want to hear about what others did during week 12?
  - b. Alternatively, would you like to see threads based on themes (e.g., struggles, successes, triggers, motivations, etc.)?
  - c. Or do you prefer to just have an open forum?
6. What types of information would you like to see on QuitNow (e.g., benefits of quitting, consequences of not quitting, stories from others, tips to stay nicotine-free, suggestions for distractions, what to expect, etc.)?
7. What do you think of incorporating support for quitting e-cigarettes on QuitNow?
  - a. How should it be different to cigarette cessation support?
  - b. How should it be similar?
8. Outside of QuitNow, what are other aspects in your life that help facilitate reducing/quitting (e.g., social support, willpower, etc.)? How could/should these be incorporated into QuitNow?
9. What additional features would you like to see on QuitNow?
10. Thinking about what we have talked about so far, if you could provide the developers of QuitNow with some advice, what would it be?
11. Would you recommend QuitNow to your friends/family? Why or why not?
12. What might be some barriers (e.g., stress, friends/family who smoke) to quitting? How could/should these be mitigated by QuitNow?



13. Would you be more likely to use QuitNow on your mobile device or laptop?
14. If you could have anything you wanted, what would you want QuitNow have/do for you?
15. How could we get the word out that QuitNow exists?
16. If we were to do a follow up study with a focus group, would you be interested in taking part in that? We will contact you if we do this.
17. Would you like to receive the results of the study once it is published?

#### **Closing: final comments (5 minutes)**

Thank you for joining me today and helping us understand more about what we can do to improve BC's largest smoking cessation service. This will help us to tailor the website so that it is better able to meet the needs of BC residents who are trying to quit smoking or vaping. We are at the end of this session but before we leave, do you have any final thoughts that you would like to share?

- Which vendor would you like to receive your \$50 honorarium for?
- Would you like to be contacted to participate in a follow-up study?
- Would you like to receive the results of the study once they are published?

#### **After the Interview**

1. Update spreadsheet (OneDrive):
  - a. Ensure participant information is updated (i.e., smoke status, vape status, QuitNow user, age, gender, consent, questionnaire, interview, honorarium, agree to follow-up, would like results of the study)
  - b. Record if they would like to participate in a follow up focus group
  - c. Record if they would like to receive results of the study
2. Upload to OneDrive
  - a. Recording
  - b. Questionnaire
3. \*\*Ensure files are labelled with participant ID, gender, and QuitNow status \*\*
  - a. E.g., "#23, M, Y" for participant number 23, male, QuitNow user (Y)
  - b. E.g., "#23, F, N" for participant number 23, female, QuitNow non-user





## INTERVIEW GUIDE FOR INDIGENOUS CURRENT QUITNOW USERS

### Preparation (using Zoom for interviews)

1. AV check
2. Recording ready (recording app on phone)
3. Materials for sharing uploaded (questionnaire, interview guide, consent form)
4. Facilitator notes
5. Ensure consent for all participants has been received
6. Make sure phone calls are blocked from phone

### Welcome/Instructions for Facilitators (5 minutes)

1. Hello, thank you for taking the time
2. Introduce yourself
3. Questionnaire – thank them for completing it; if they haven't had a chance to do it, go through it on share screen
4. Purpose of the study: to invite BC residents to provide their input of the smoking cessation service, QuitNow.
5. Questions?
6. Interview is being recorded – is that okay?
7. Acknowledge that this research is taking place on the unceded territory of the Syilx/Okanagan people.

### QuitNow Questions (~50 minutes)

*We are now going to ask you to walk through the QuitNow website and talk about what aspects of it worked well and which ones did not. So, to start...*

1. Do you/have you used QuitNow on your mobile device and/or laptop?
2. How did you hear about QuitNow?
3. How have you used QuitNow to help you quit?
4. Why did you start using QuitNow? What kept you coming back? OR Why did you not use it/stop using it?
5. We understand that you identify as Indigenous. Which nation do you belong to?
6. We understand that tobacco is considered a medicine in some Indigenous cultures. Is that the case with your nation as well?
  - a. How should this be honored in QuitNow?
7. What other aspects of your nation's culture or of Indigenous culture in general might be honored in QuitNow?
8. What about QuitNow do you like the most?
  - a. Which aspects do you use the most?
  - b. How (said aspects) help you in reaching your goals of reducing or quitting?
  - c. Can you tell me about a time when (said aspect) helped you?
  - d. How could this aspect be improved/even better?
  - e. What aspects of QuitNow resonate with your nation's culture or Indigenous culture in general as you understand it?



9. What about QuitNow do you not like?
  - a. What were its limitations in relation to your efforts to reduce/quit?
  - b. What were you hoping for instead?
  - c. How could this limitation be addressed (e.g., should it be removed, or could it be improved)?
  - d. What aspects of QuitNow do not resonate with your nation's culture or Indigenous culture in general as you understand it? How could this be addressed?
10. How would you like to receive social support on QuitNow?
11. Would you want the QuitNow forum to have discussion threads?
  - a. If you were at week 1, would you want to hear about what others did during week 12?
  - b. Alternatively, would you like to see threads based on themes (e.g., struggles, successes, triggers, motivations, etc.)?
  - c. Or do you prefer to just have an open forum?
12. What types of information would you like to see on QuitNow (e.g., benefits of quitting, consequences of not quitting, stories from others, tips to stay nicotine-free, suggestions for distractions, what to expect, etc.)?
13. What do you think of incorporating support for quitting e-cigarettes (e.g., Juul) on QuitNow?
  - a. How should it be different to cigarette cessation support?
  - b. How should it be similar?
14. What additional features would you like to see on QuitNow?
15. Do you have any suggestions for improving the look and feel of QuitNow?
16. Would you recommend QuitNow to your friends/family? Why or why not?
17. How could we get the word out that QuitNow exists?
18. Outside of QuitNow, what are other aspects in your life that help facilitate reducing/quitting (e.g., social support, willpower, etc.)? How could/should these be incorporated into QuitNow?
19. What might be some barriers (e.g., stress, friends or family who smoke)? How could/should these be mitigated by QuitNow?
20. For QuitNow users: You have told me that you have [reduced/quit/no change in] smoking since you were first introduced to QuitNow. What do you think has been the biggest influencing factor? Overall, how helpful has QuitNow been to you?
21. Thinking about what we have talked about so far, if you could provide the developers of QuitNow with some advice, what would it be?
22. If you could have anything you wanted (i.e., in an ideal world), what would you want QuitNow have/do for you?

**Closing: final comments (5 minutes)**

Thank you for joining me today and helping us understand more about what we can do to improve BC's largest smoking cessation service. This will help us to tailor the website so that it is better able to meet the needs of BC residents who are trying to quit smoking or vaping. We are at the end of this session but before we leave, do you have any final thoughts that you would like to share?

way' limlæmt, | thank you



## INTERVIEW GUIDE FOR INDIGENOUS POTENTIAL QUITNOW USERS

### Preparation (using Zoom for interviews)

1. AV check
2. Recording ready (recording app on phone)
3. Materials for sharing uploaded (questionnaire, interview guide, consent form)
4. Facilitator notes
5. Ensure consent for all participants has been received
6. Make sure phone calls are blocked from phone

### Welcome/Instructions for Facilitators (5 minutes)

1. Hello, thank you for taking the time
2. Introduce yourself
3. Questionnaire – thank them for completing it; if they haven't had a chance to do it, go through it on share screen
4. Purpose of the study: to invite BC residents to provide their input of the smoking cessation service, QuitNow.
5. Questions?
6. Confirm that they have looked through the QuitNow website
7. Interview is being recorded – is that okay?
8. Acknowledge that this research is taking place on the unceded territory of the Syilx/Okanagan people.

### QuitNow Questions (~30 minutes)

*Before this interview, you were asked to take a look at the QuitNow website, so I want to now hear about your reactions to the website and what it currently offers.*

1. Let's start with the overall look and feel.
  - a. What is your initial reaction?
  - b. How could it be improved?
2. What aspects of the website did you like?
  - a. What would you find helpful in quitting smoking?
  - b. What would keep you coming back?
3. What did you not like?
  - a. What are the major limitations of the site?
  - b. What makes you not want to come back to it?
4. How would you like to receive support on QuitNow?
5. Would you want the QuitNow forum to have discussion threads?
  - a. If you were at week 1, would you want to hear about what others did during week 12?
  - b. Alternatively, would you like to see threads based on themes (e.g., struggles, successes, triggers, motivations, etc.)?
  - c. Or do you prefer to just have an open forum?
6. What types of information would you like to see on QuitNow (e.g., benefits of quitting, consequences of not quitting, stories from others, tips to stay nicotine-free, suggestions for distractions, what to expect, etc.)?



**a place of mind**  
THE UNIVERSITY OF BRITISH COLUMBIA

7. What do you think of incorporating support for quitting e-cigarettes (e.g., Juul) on QuitNow?
  - a. How should it be different to cigarette cessation support?
  - b. How should it be similar?
8. You mentioned that you identify as Indigenous. Which nation do you belong to?
9. We understand that tobacco is considered a medicine in some Indigenous cultures. Is that the case with your nation as well?
  - a. How should this be honored in QuitNow?
10. What other aspects of your nation's culture or of Indigenous culture in general might be honored in QuitNow?
11. Outside of QuitNow, what are other aspects in your life that help facilitate reducing/quitting (e.g., social support, willpower, etc.)? How could/should these be incorporated into QuitNow?
12. What additional features would you like to see on QuitNow?
13. Thinking about what we have talked about so far, if you could provide the developers of QuitNow with some advice, what would it be?
14. Would you recommend QuitNow to your friends/family? Why or why not?
15. What might be some barriers (e.g., stress, friends/family who smoke) to quitting? How could/should these be mitigated by QuitNow?
16. Would you be more likely to use QuitNow on your mobile device or laptop?
17. If you could have anything you wanted, what would you want QuitNow have/do for you?
18. How could we get the word out that QuitNow exists?
19. If we were to do a follow up study with a focus group, would you be interested in taking part in that? We will contact you if we do this.
20. Would you like to receive the results of the study once it is published?

**Closing: final comments (5 minutes)**

Thank you for joining me today and helping us understand more about what we can do to improve BC's largest smoking cessation service. This will help us to tailor the website so that it is better able to meet the needs of BC residents who are trying to quit smoking or vaping. We are at the end of this session but before we leave, do you have any final thoughts that you would like to share?

way' limlæmt,| thank you

# Reporting checklist for qualitative study.

Based on the SRQR guidelines.

## EXPERIENCES OF NICOTINE USERS MOTIVATED TO QUIT DURING THE COVID-19 PANDEMIC: A SECONDARY QUALITATIVE ANALYSIS

### AUTHORS

-Ramona H. Sharma, BSc, MSW Student - School of Social Work, The University of British Columbia (Okanagan Campus), Kelowna, Canada

-Danielle Rodberg, BSN Student - School of Nursing, The University of British Columbia (Okanagan Campus), Kelowna, Canada

-Laura L. Struik, PhD, Assistant Professor - School of Nursing, The University of British Columbia (Okanagan Campus), Kelowna, Canada

|                     | Reporting Item                                                                                                                                                                                                                                          | Page Number |
|---------------------|---------------------------------------------------------------------------------------------------------------------------------------------------------------------------------------------------------------------------------------------------------|-------------|
| <b>Title</b>        |                                                                                                                                                                                                                                                         |             |
|                     | <a href="#">#1</a> Concise description of the nature and topic of the study identifying the study as qualitative or indicating the approach (e.g. ethnography, grounded theory) or data collection methods (e.g. interview, focus group) is recommended | 1-4         |
| <b>Abstract</b>     |                                                                                                                                                                                                                                                         |             |
|                     | <a href="#">#2</a> Summary of the key elements of the study using the abstract format of the intended publication; typically includes background, purpose, methods, results and conclusions                                                             | 2           |
| <b>Introduction</b> |                                                                                                                                                                                                                                                         |             |
| Problem formulation | <a href="#">#3</a> Description and significance of the problem / phenomenon studied: review of relevant theory and empirical work; problem statement                                                                                                    | 3-4         |

|    |                           |                     |                                                           |
|----|---------------------------|---------------------|-----------------------------------------------------------|
| 1  |                           |                     |                                                           |
| 2  |                           |                     |                                                           |
| 3  |                           |                     |                                                           |
| 4  | Purpose or research       | <a href="#">#4</a>  | Purpose of the study and specific objectives or           |
| 5  | question                  |                     | questions                                                 |
| 6  |                           |                     | 4                                                         |
| 7  | <b>Methods</b>            |                     |                                                           |
| 8  |                           |                     |                                                           |
| 9  | Qualitative approach and  | <a href="#">#5</a>  | Qualitative approach (e.g. ethnography, grounded          |
| 10 | research paradigm         |                     | theory, case study, phenomenology, narrative              |
| 11 |                           |                     | research) and guiding theory if appropriate; identifying  |
| 12 |                           |                     | the research paradigm (e.g. postpositivist,               |
| 13 |                           |                     | constructivist / interpretivist) is also recommended;     |
| 14 |                           |                     | rationale. The rationale should briefly discuss the       |
| 15 |                           |                     | justification for choosing that theory, approach,         |
| 16 |                           |                     | method or technique rather than other options             |
| 17 |                           |                     | available; the assumptions and limitations implicit in    |
| 18 |                           |                     | those choices and how those choices influence study       |
| 19 |                           |                     | conclusions and transferability. As appropriate the       |
| 20 |                           |                     | rationale for several items might be discussed            |
| 21 |                           |                     | together.                                                 |
| 22 |                           |                     |                                                           |
| 23 |                           |                     |                                                           |
| 24 |                           |                     |                                                           |
| 25 |                           |                     |                                                           |
| 26 |                           |                     |                                                           |
| 27 |                           |                     |                                                           |
| 28 | Researcher                | <a href="#">#6</a>  | Researchers' characteristics that may influence the       |
| 29 | characteristics and       |                     | research, including personal attributes, qualifications / |
| 30 | reflexivity               |                     | experience, relationship with participants,               |
| 31 |                           |                     | assumptions and / or presuppositions; potential or        |
| 32 |                           |                     | actual interaction between researchers'                   |
| 33 |                           |                     | characteristics and the research questions, approach,     |
| 34 |                           |                     | methods, results and / or transferability                 |
| 35 |                           |                     |                                                           |
| 36 |                           |                     |                                                           |
| 37 |                           |                     |                                                           |
| 38 | Context                   | <a href="#">#7</a>  | Setting / site and salient contextual factors; rationale  |
| 39 |                           |                     | 5-6; 13-14                                                |
| 40 | Sampling strategy         | <a href="#">#8</a>  | How and why research participants, documents, or          |
| 41 |                           |                     | events were selected; criteria for deciding when no       |
| 42 |                           |                     | further sampling was necessary (e.g. sampling             |
| 43 |                           |                     | saturation); rationale                                    |
| 44 |                           |                     |                                                           |
| 45 |                           |                     |                                                           |
| 46 | Ethical issues pertaining | <a href="#">#9</a>  | Documentation of approval by an appropriate ethics        |
| 47 | to human subjects         |                     | review board and participant consent, or explanation      |
| 48 |                           |                     | for lack thereof; other confidentiality and data security |
| 49 |                           |                     | issues                                                    |
| 50 |                           |                     | 4-5                                                       |
| 51 |                           |                     |                                                           |
| 52 | Data collection methods   | <a href="#">#10</a> | Types of data collected; details of data collection       |
| 53 |                           |                     | procedures including (as appropriate) start and stop      |
| 54 |                           |                     | dates of data collection and analysis, iterative          |
| 55 |                           |                     | 4-6                                                       |
| 56 |                           |                     |                                                           |
| 57 |                           |                     |                                                           |
| 58 |                           |                     |                                                           |
| 59 |                           |                     |                                                           |
| 60 |                           |                     |                                                           |

|    |                              |                                                                           |       |
|----|------------------------------|---------------------------------------------------------------------------|-------|
| 1  |                              |                                                                           |       |
| 2  |                              |                                                                           |       |
| 3  |                              |                                                                           |       |
| 4  |                              | process, triangulation of sources / methods, and                          |       |
| 5  |                              | modification of procedures in response to evolving                        |       |
| 6  |                              | study findings; rationale                                                 |       |
| 7  |                              |                                                                           |       |
| 8  | Data collection              | <a href="#">#11</a> Description of instruments (e.g. interview guides,    | 5-6   |
| 9  | instruments and              | questionnaires) and devices (e.g. audio recorders)                        |       |
| 10 | technologies                 | used for data collection; if / how the instruments(s)                     |       |
| 11 |                              | changed over the course of the study                                      |       |
| 12 |                              |                                                                           |       |
| 13 |                              |                                                                           |       |
| 14 | Units of study               | <a href="#">#12</a> Number and relevant characteristics of participants,  | 5-7   |
| 15 |                              | documents, or events included in the study; level of                      |       |
| 16 |                              | participation (could be reported in results)                              |       |
| 17 |                              |                                                                           |       |
| 18 |                              |                                                                           |       |
| 19 | Data processing              | <a href="#">#13</a> Methods for processing data prior to and during       | 4-6   |
| 20 |                              | analysis, including transcription, data entry, data                       |       |
| 21 |                              | management and security, verification of data                             |       |
| 22 |                              | integrity, data coding, and anonymisation /                               |       |
| 23 |                              | deidentification of excerpts                                              |       |
| 24 |                              |                                                                           |       |
| 25 |                              |                                                                           |       |
| 26 | Data analysis                | <a href="#">#14</a> Process by which inferences, themes, etc. were        | 4-6   |
| 27 |                              | identified and developed, including the researchers                       |       |
| 28 |                              | involved in data analysis; usually references a specific                  |       |
| 29 |                              | paradigm or approach; rationale                                           |       |
| 30 |                              |                                                                           |       |
| 31 |                              |                                                                           |       |
| 32 | Techniques to enhance        | <a href="#">#15</a> Techniques to enhance trustworthiness and credibility | 5-6   |
| 33 | trustworthiness              | of data analysis (e.g. member checking, audit trail,                      |       |
| 34 |                              | triangulation); rationale                                                 |       |
| 35 |                              |                                                                           |       |
| 36 |                              |                                                                           |       |
| 37 | <b>Results/findings</b>      |                                                                           |       |
| 38 |                              |                                                                           |       |
| 39 | Syntheses and                | <a href="#">#16</a> Main findings (e.g. interpretations, inferences, and  | 6-13  |
| 40 | interpretation               | themes); might include development of a theory or                         |       |
| 41 |                              | model, or integration with prior research or theory                       |       |
| 42 |                              |                                                                           |       |
| 43 |                              |                                                                           |       |
| 44 | Links to empirical data      | <a href="#">#17</a> Evidence (e.g. quotes, field notes, text excerpts,    | 9-13  |
| 45 |                              | photographs) to substantiate analytic findings                            |       |
| 46 |                              |                                                                           |       |
| 47 |                              |                                                                           |       |
| 48 | <b>Discussion</b>            |                                                                           |       |
| 49 |                              |                                                                           |       |
| 50 | Intergration with prior      | <a href="#">#18</a> Short summary of main findings; explanation of how    | 13-16 |
| 51 | work, implications,          | findings and conclusions connect to, support,                             |       |
| 52 | transferability and          | elaborate on, or challenge conclusions of earlier                         |       |
| 53 | contribution(s) to the field | scholarship; discussion of scope of application /                         |       |
| 54 |                              |                                                                           |       |
| 55 |                              |                                                                           |       |
| 56 |                              |                                                                           |       |
| 57 |                              |                                                                           |       |
| 58 |                              |                                                                           |       |
| 59 |                              |                                                                           |       |
| 60 |                              |                                                                           |       |

|                       |                     |                                                                                                                |    |
|-----------------------|---------------------|----------------------------------------------------------------------------------------------------------------|----|
|                       |                     | generalizability; identification of unique contributions(s) to scholarship in a discipline or field            |    |
| Limitations           | <a href="#">#19</a> | Trustworthiness and limitations of findings                                                                    | 16 |
| <b>Other</b>          |                     |                                                                                                                |    |
| Conflicts of interest | <a href="#">#20</a> | Potential sources of influence of perceived influence on study conduct and conclusions; how these were managed | 17 |
| Funding               | <a href="#">#21</a> | Sources of funding and other support; role of funders in data collection, interpretation and reporting         | 17 |

The SRQR checklist is distributed with permission of Wolters Kluwer © 2014 by the Association of American Medical Colleges. This checklist was completed on 26. April 2019 using <https://www.goodreports.org/>, a tool made by the [EQUATOR Network](#) in collaboration with [Penelope.ai](#)
